# Supplementary material for: Palladium-catalyzed one-pot phosphorylation of phenols mediated by sulfuryl fluoride
Source: Royal Society of Chemistry journal article supplement (doi:10.1039/d1cc00769f), 2021-01-01
Supplement: d1cc00769f1.pdf [file d1cc00769f1.pdf]

# Palladium-Catalyzed One-Pot Phosphorylation of Phenols Mediated by Sulfuryl Fluoride

Yiyuan Zhang,<sup>a,c,d,e,1</sup> Wanting Chen,<sup>a,c,d,e,1</sup> Tingting Tan,<sup>a,c,d,e</sup> Yuang Gu,<sup>a,c</sup> Shuning Zhang,<sup>a,c</sup> Jie Li,<sup>a</sup>  
Yan Wang,<sup>a,c,d,e</sup> Wei Hou,<sup>b</sup> Guang Yang,<sup>a</sup> Peixiang Ma,<sup>\*,a</sup> and Hongtao Xu<sup>\*,a</sup>

<sup>a</sup> Shanghai Institute for Advanced Immunochemical Studies, ShanghaiTech University, Shanghai, 201210, China.

<sup>b</sup> College of Pharmaceutical Science, and Institute of Drug Development & Chemical Biology, Zhejiang University of Technology, Hangzhou, 310014, China.

<sup>c</sup> School of Life Science and Technology, ShanghaiTech University, Shanghai, 201210, China.

<sup>d</sup> Institute of Biochemistry and Cell Biology, Shanghai Institutes for Biological Sciences, Chinese Academy of Sciences, Shanghai, 200031, China.

<sup>e</sup> University of Chinese Academy of Sciences, Beijing, 100049, China.

<sup>1</sup> These authors contributed equal.

Email: [xuht@shanghaitech.edu.cn](mailto:xuht@shanghaitech.edu.cn)(Xu H.)

[mapx@shanghaitech.edu.cn](mailto:mapx@shanghaitech.edu.cn) (Ma P.)

## Contents

|                                                                                                                |            |
|----------------------------------------------------------------------------------------------------------------|------------|
| <b>I. General Information.....</b>                                                                             | <b>S2</b>  |
| <b>II. Experimental Procedures and Characterizations.....</b>                                                  | <b>S3</b>  |
| <b>III. The stability of 1a in the presence of TMSOH.....</b>                                                  | <b>S13</b> |
| <b>IV. Synthesis of enantiomerically pure P-chiral 3aj.....</b>                                                | <b>S14</b> |
| <b>V. Synthesis of DNA conjugated phosphine oxide D2.....</b>                                                  | <b>S15</b> |
| <b>VI. Copies of <sup>1</sup>H NMR, <sup>13</sup>C NMR, <sup>31</sup>P NMR <sup>19</sup>F NMR Spectra.....</b> | <b>S19</b> |
| <b>VII. Reference.....</b>                                                                                     | <b>S44</b> |

## I. General Information.

All commercially available organic compounds and DNA headpiece HP-NH<sub>2</sub> (5'- / 5phos / GAGTCA / iSp9 / iUniAmM / iSp9 / TGACTCCC-3', Figure 1) were purchased from commercial sources unless otherwise noted and used as received. The substrates **1** were prepared according to our previous paper.<sup>1</sup> <sup>1</sup>H NMR, <sup>13</sup>C NMR, <sup>31</sup>P NMR and <sup>19</sup>F NMR spectra were recorded on Bruker AM-500 instruments. High-resolution mass spectra (HRMS-ESI) were obtained on an Agilent Technologies 6230 Accurate Mass TOF LC/MS instrument or an AB SCIEX 4600 QTOF MS instrument. All on-DNA reactions were performed in 1.5 mL or 5 mL Eppendorf tubes. On-DNA reaction were analyzed by LC-MS. Typically, samples were dissolved in an appropriate amount of distilled and deionized water (ddH<sub>2</sub>O) and injected into a reverse-phase chromatography column (Xbridge Oligonucleotide BEH C18 column, 1.7 μm, 2.1×50 mm). The elution was carried out as followings: 5–95% solvent B over 4.5 min, 0.4 mL/min, λ = 260 nm; solvent A: 0.75% v/v hexafluoroisopropanol/ 0.038% v/v triethylamine in methanol/water = 5/95; solvent B: 0.75% v/v hexafluoroisopropanol/ 0.038% v/v triethylamine in methanol/water = 90/10. The effluents were analyzed by a Waters G2 TOF electrospray mass spectrometer in negative ion mode. Ignoring UV coefficient difference for all DNA products and assuming 100% of DNA total recovery, the yield of DNA products was determined from UV absorbance trace (260 nm) peak area using the equation below:

$$Yield (product, \%) = \frac{\% \text{ UV (product)}}{\% \text{ UV (DNA starting material before reaction)}} \times 100\%$$

Caution: Sulfuryl fluoride (SO<sub>2</sub>F<sub>2</sub>, MW = 102 g/mol, ρ = 4.17 g/cm<sup>3</sup>, bp = -55.20 °C) is a toxic gas that can resistant to hydrolysis up to 150 °C. The use of SO<sub>2</sub>F<sub>2</sub> must be executed in a well ventilated fumehood. The excess SO<sub>2</sub>F<sub>2</sub> can be quenched by basic aqueous medium.

## II. Experimental Procedures and Characterizations:

Table S1. Screening of the reaction conditions

| entry            | Derivation from the standard conditions                                              | Yield (%) <sup>[b]</sup> |
|------------------|--------------------------------------------------------------------------------------|--------------------------|
| 1 <sup>[a]</sup> | none                                                                                 | 93 (87) <sup>[c]</sup>   |
| 2                | without Pd(OAc) <sub>2</sub> and dppf, 80 °C                                         | 0                        |
| 3                | without dppf, 80 °C                                                                  | 5                        |
| 4                | dppp (instead of dppf), 80 °C                                                        | 48                       |
| 5                | BINAP (instead of dppf), 80 °C                                                       | 53                       |
| 6                | Xphos (instead of dppf), 80 °C                                                       | 58                       |
| 7                | Xantophos (instead of dppf), 80 °C                                                   | 75                       |
| 8                | Pd(PPh <sub>3</sub> ) <sub>2</sub> (instead of Pd(OAc) <sub>2</sub> and dppf), 80 °C | 55                       |
| 9                | Pd(OAc) <sub>2</sub> (10 mol%) and dppf (20 mol%), 80 °C                             | 95                       |
| 10               | Pd(OAc) <sub>2</sub> (2 mol%) and dppf (4 mol%), 80 °C                               | 90                       |
| 11               | in the absence of argon, 80 °C                                                       | 45                       |
| 12               | 60 °C                                                                                | 92                       |
| 13               | 40 °C                                                                                | 11                       |
| 14               | <b>2a</b> (2 equiv), CH <sub>3</sub> CN-H <sub>2</sub> O (4:1) as solvent, 80 °C     | 93                       |
| 15               | DMF as solvent, 80 °C                                                                | 59                       |
| 16               | DMA as solvent, 80 °C                                                                | 62                       |
| 17               | 1,4-dioxane as solvent, 80 °C                                                        | 47                       |
| 18               | Et <sub>3</sub> N as base, 80 °C                                                     | 90                       |
| 19               | Na <sub>2</sub> CO <sub>3</sub> as base, 80 °C                                       | 34                       |

<sup>[a]</sup>Standard conditions: **1a** (0.2 mmol), **2a** (0.25 mmol), DIPEA (0.4 mmol), Pd(OAc)<sub>2</sub> (5 mol %)/dppf (10 mol %) in CH<sub>3</sub>CN (1 mL) were stirred at 80 °C for 5h under argon. <sup>[b]</sup>yield determined by LC-MS. <sup>[c]</sup>Isolated yield.

### General Procedure for the Synthesis of Aryl Fluorosulfates

A 100 mL flask equipped with a magnetic stir bar was charged with the relative phenol (5 mmol, 1 equiv), Et<sub>3</sub>N or DIPEA (10 mmol, 2 equiv) and DCM (25 mL). Sealed with a rubber septum, the flask was evacuated to low vacuum and backfilled with sulfuryl fluoride gas by a balloon. The resulting mixture was stirred at room temperature for 3~5 h. Upon completion, volatiles were removed in vacuo. The crude product was purified by flash chromatography on silica gel to give the desired aryl fluorosulfate.

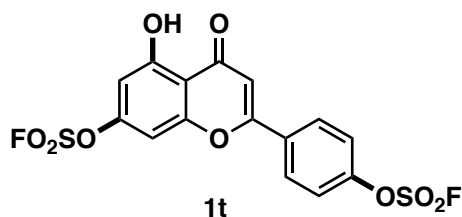

Yellow solid, 95% yield.  $^1\text{H}$  NMR (500 MHz, DMSO- $d_6$ )  $\delta$  12.96 (s, 1H), 8.40 – 8.34 (m, 2H), 7.90 – 7.85 (m, 2H), 7.65 (d,  $J = 2.3$  Hz, 1H), 7.35 (s, 1H), 7.18 (d,  $J = 2.3$  Hz, 1H).  $^{13}\text{C}$  NMR (126 MHz, DMSO)  $\delta$  183.08, 163.32, 162.01, 156.91, 153.57, 152.30, 131.57, 130.05, 122.60, 110.88, 107.86, 105.15, 101.92.  $^{19}\text{F}$  NMR (376 MHz, DMSO)  $\delta$  40.56, 39.74. HRMS (ESI): Calcd for  $\text{C}_{15}\text{H}_9\text{F}_2\text{O}_9\text{S}_2$ :  $[\text{M}+\text{H}]^+$  434.9656, found:  $m/z$  434.9650.

### **Standard Conditions: Procedure for the Phosphorylation of Fluorosulfates**

A 25 mL flask equipped with a magnetic stir bar was charged with the relative fluorosulfate **1** (0.2 mmol), P(O)H compound **2** (0.25 mmol), Pd(OAc) $_2$  (5 mol %), dppf (10 mol %), DIPEA (0.4 mmol) and CH $_3$ CN (1 mL). Sealed with a rubber septum, the flask was evacuated to low vacuum and backfilled with argon at room temperature. Then the resulting mixture was stirred at 80 °C for 5h. Upon completion, volatiles were removed in vacuo. The crude product was purified by flash chromatography on silica gel to give the desired product **3**.

### **One-Pot Synthesis: Procedure for the Phosphorylation of Phenols**

A 25 mL flask equipped with a magnetic stir bar was charged with the relative phenol (0.2 mmol), DIPEA (0.4 mmol) and CH $_3$ CN (1 mL). Sealed with a rubber septum, the flask was evacuated to low vacuum and backfilled with sulfuryl fluoride gas by a balloon. The resulting mixture was stirred at room temperature for 3 h. Upon completion, the sulfuryl fluoride gas balloon was removed and the flask was purged with argon for 3 times. After that, TMSOH (0.6 mmol) was added and stirred for 30 min to remove the fluoride ion, followed by addition of P(O)H compound **2** (0.25 mmol), Pd(OAc) $_2$  (5 mol %), dppf (10 mol %), DIPEA (0.4 mmol). Sealed with a rubber septum, the flask was evacuated to low vacuum and backfilled with argon at room temperature. Then resulting mixture was stirred at 80 °C for 5h. Upon completion, volatiles were removed in vacuo. The crude product was purified by flash chromatography on silica gel to give the desired product **3**.

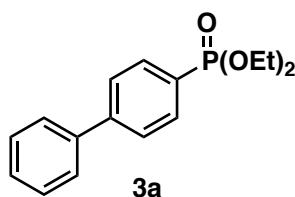

Colorless oil, 87% yield, (90% for one-pot).  $^1\text{H}$  NMR (500 MHz, CDCl $_3$ )  $\delta$  7.92 – 7.85 (m, 2H), 7.70 – 7.67 (m, 2H), 7.62 – 7.59 (m, 2H), 7.49 – 7.44 (m, 2H), 7.42 – 7.38 (m, 1H), 4.23 – 4.05 (m, 4H), 1.35 (t,  $J = 7.1$  Hz, 6H). These data are in agreement with literature data.<sup>2</sup>

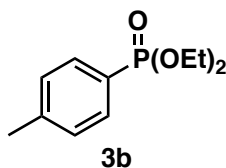

Colorless oil, 92% yield, (91% for one-pot).  $^1\text{H}$  NMR (500 MHz, CDCl $_3$ )  $\delta$  7.70 (dd,  $J = 12.9, 7.8$  Hz, 2H), 7.29 – 7.26 (m, 2H), 4.22 – 3.99 (m, 4H), 2.40 (s, 3H), 1.31 (t,  $J = 7.0$  Hz, 6H). These data are in agreement with literature data.<sup>3</sup>

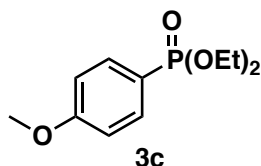

Colorless oil, 90% yield.  $^1\text{H NMR}$  (500 MHz,  $\text{CDCl}_3$ )  $\delta$  7.78 – 7.70 (m, 2H), 7.01 – 6.91 (m, 2H), 4.17 – 3.97 (m, 4H), 3.85 (s, 3H), 1.31 (t,  $J = 7.0$  Hz, 6H). These data are in agreement with literature data.<sup>4</sup>

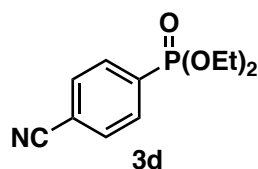

Colorless oil, 84% yield, (90% for one-pot).  $^1\text{H NMR}$  (500 MHz,  $\text{CDCl}_3$ )  $\delta$  7.92 (dd,  $J = 12.9, 7.8$  Hz, 2H), 7.76 (dd,  $J = 8.1, 2.8$  Hz, 2H), 4.24 – 4.06 (m, 4H), 1.34 (t,  $J = 7.0$  Hz, 6H). These data are in agreement with literature data.<sup>5</sup>

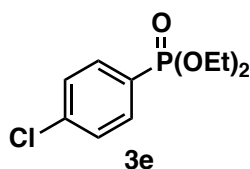

Colorless oil, 93% yield, (88% for one-pot).  $^1\text{H NMR}$  (500 MHz,  $\text{CDCl}_3$ )  $\delta$  7.75 (dd,  $J = 12.5, 8.0$  Hz, 2H), 7.45 (dd,  $J = 8.0, 2.1$  Hz, 2H), 4.23 – 4.00 (m, 4H), 1.32 (t,  $J = 7.0$  Hz, 6H). These data are in agreement with literature data.<sup>5</sup>

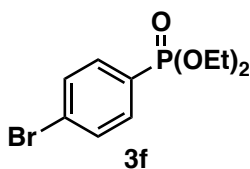

Colorless oil, 90% yield, (87% for one-pot).  $^1\text{H NMR}$  (500 MHz,  $\text{CDCl}_3$ )  $\delta$  7.67 (dd,  $J = 12.7, 8.2$  Hz, 2H), 7.61 (dd,  $J = 8.3, 3.4$  Hz, 2H), 4.20 – 4.02 (m, 4H), 1.32 (t,  $J = 7.0$  Hz, 6H). These data are in agreement with literature data.<sup>6</sup>

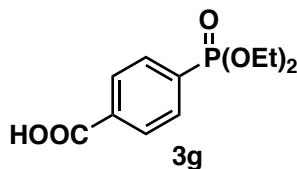

White solid, 93% yield.  $^1\text{H NMR}$  (500 MHz,  $\text{CDCl}_3$ )  $\delta$  11.23 – 11.03 (m, 1H), 8.19 (dd,  $J = 8.1, 3.5$  Hz, 2H), 7.93 (dd,  $J = 13.0, 7.9$  Hz, 2H), 4.27 – 4.09 (m, 4H), 1.34 (t,  $J = 7.0$  Hz, 6H). These data are in agreement with literature data.<sup>7</sup>

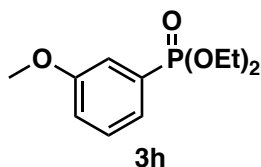

Colorless oil, 82% yield, (80% for one-pot).  $^1\text{H NMR}$  (500 MHz,  $\text{CDCl}_3$ )  $\delta$  7.40 – 7.31 (m, 3H), 7.11 – 7.05 (m, 1H), 4.19 – 4.03 (m, 4H), 3.84 (s, 3H), 1.32 (t,  $J = 7.1$  Hz, 6H). These data are in agreement with literature data.<sup>8</sup>

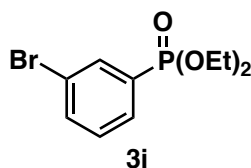

Colorless oil, 93% yield,  $^1\text{H NMR}$  (500 MHz,  $\text{CDCl}_3$ )  $\delta$  7.94 (d,  $J = 12.5$  Hz, 1H), 7.74 (dd,  $J = 12.4, 7.5$  Hz, 1H), 7.68 (dd,  $J = 8.1, 1.7$  Hz, 1H), 7.35 (dt,  $J = 9.1, 4.5$  Hz, 1H), 4.19 – 4.07 (m, 4H), 1.34 (t,  $J = 6.9$  Hz, 6H). These data are in agreement with literature data.<sup>9</sup>

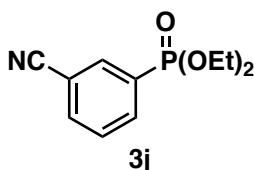

Colorless oil, 85% yield, (82% for one-pot).  $^1\text{H NMR}$  (500 MHz,  $\text{CDCl}_3$ )  $\delta$  8.08 (dd,  $J = 13.3, 1.7$  Hz, 1H), 8.06 – 8.01 (m, 1H), 7.82 (dq,  $J = 7.8, 1.2$  Hz, 1H), 7.60 (td,  $J = 7.7, 3.5$  Hz, 1H), 4.25 – 4.06 (m, 4H), 1.34 (t,  $J = 7.0$  Hz, 6H). These data are in agreement with literature data.<sup>10</sup>

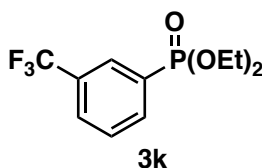

Colorless oil, 92% yield, (89% for one-pot).  $^1\text{H NMR}$  (500 MHz,  $\text{CDCl}_3$ )  $\delta$  8.07 (d,  $J = 13.6$  Hz, 1H), 8.00 (dd,  $J = 13.0, 7.6$  Hz, 1H), 7.81 (d,  $J = 7.9$  Hz, 1H), 7.61 (td,  $J = 7.7, 3.7$  Hz, 1H), 4.24 – 4.06 (m, 4H), 1.34 (t,  $J = 7.1$  Hz, 6H). These data are in agreement with literature data.<sup>5</sup>

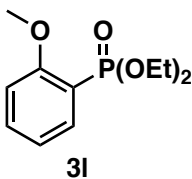

Colorless oil, 80% yield.  $^1\text{H NMR}$  (500 MHz,  $\text{CDCl}_3$ )  $\delta$  7.82 (ddd,  $J = 14.9, 7.6, 1.8$  Hz, 1H), 7.54 – 7.47 (m, 1H), 7.05 – 6.98 (m, 1H), 6.98 – 6.91 (m, 1H), 4.24 – 4.07 (m, 4H), 3.90 (s, 3H), 1.33 (t,  $J = 7.1$  Hz, 6H). These data are in agreement with literature data. These data are in agreement with literature data.<sup>11</sup>

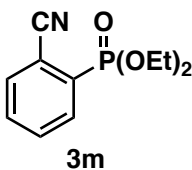

Colorless oil, 67% yield.  $^1\text{H NMR}$  (500 MHz,  $\text{CDCl}_3$ )  $\delta$  8.12 (dd,  $J = 14.1, 7.4$  Hz, 1H), 7.84 – 7.77 (m, 1H), 7.73 – 7.62 (m, 2H), 4.32 – 4.13 (m, 4H), 1.38 (t,  $J = 7.0$  Hz, 6H). These data are in agreement with literature data.<sup>12</sup>

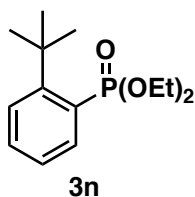

Colorless oil, 53% yield. <sup>1</sup>H NMR (500 MHz, DMSO-*d*<sub>6</sub>) δ 7.89 (ddd, *J* = 14.9, 7.8, 1.6 Hz, 1H), 7.60 (td, *J* = 7.8, 7.4, 1.3 Hz, 1H), 7.53 (tt, *J* = 8.4, 1.7 Hz, 1H), 7.35 (tdd, *J* = 7.4, 2.6, 1.3 Hz, 1H), 4.09 – 3.95 (m, 4H), 1.51 (s, 9H), 1.24 (t, *J* = 7.1 Hz, 6H). <sup>13</sup>C NMR (126 MHz, DMSO) δ 155.02, 154.92, 135.76, 135.70, 132.80, 132.78, 127.89, 127.77, 127.63, 126.21, 126.14, 126.04, 61.97, 61.93, 37.14, 37.12, 32.05, 16.53, 16.48. <sup>31</sup>P NMR (202 MHz, DMSO) δ 19.88. HRMS (ESI): Calcd for C<sub>14</sub>H<sub>23</sub>O<sub>3</sub>P: [M+H]<sup>+</sup> 271.1463, found: *m/z* 271.1458.

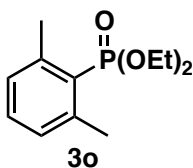

Colorless oil, 58% yield. <sup>1</sup>H NMR (500 MHz, CDCl<sub>3</sub>) δ 7.26 (t, 1H), 7.08 (dd, *J* = 7.6, 4.7 Hz, 2H), 4.16 (dp, *J* = 10.0, 7.2 Hz, 2H), 4.05 (dp, *J* = 10.0, 7.2 Hz, 2H), 2.64 (d, *J* = 1.6 Hz, 6H), 1.32 (t, *J* = 7.1 Hz, 6H). These data are in agreement with literature data.<sup>13</sup>

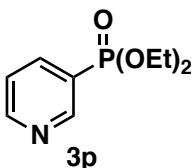

Colorless oil, 90% yield, (82% for one-pot). <sup>1</sup>H NMR (500 MHz, CDCl<sub>3</sub>) δ 8.97 (dd, *J* = 6.6, 2.0 Hz, 1H), 8.77 (dt, *J* = 4.5, 2.1 Hz, 1H), 8.13 (ddt, *J* = 13.3, 7.8, 1.9 Hz, 1H), 7.43 (dt, *J* = 8.1, 4.1 Hz, 1H), 4.24 – 4.07 (m, 4H), 1.34 (t, *J* = 7.1 Hz, 6H). These data are in agreement with literature data.<sup>14</sup>

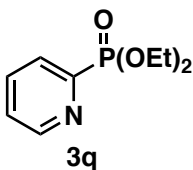

Colorless oil, 90% yield, (93% for one-pot). <sup>1</sup>H NMR (500 MHz, CDCl<sub>3</sub>) δ 8.78 (d, *J* = 4.6 Hz, 1H), 7.95 (t, *J* = 7.2 Hz, 1H), 7.79 (tdd, *J* = 7.6, 5.5, 1.5 Hz, 1H), 7.41 (dd, *J* = 8.5, 4.3 Hz, 1H), 4.29 – 4.14 (m, 4H), 1.32 (t, *J* = 7.1 Hz, 6H). These data are in agreement with literature data.<sup>15</sup>

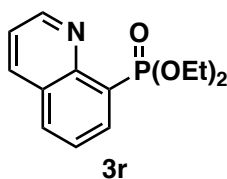

Colorless oil, 91% yield, (83% for one-pot). <sup>1</sup>H NMR (500 MHz, DMSO) δ 9.02 (dd, *J* = 4.2, 1.8 Hz, 1H), 8.47 (dt, *J* = 8.3, 2.1 Hz, 1H), 8.29 – 8.19 (m, 2H), 7.71 (ddd, *J* = 8.1, 7.1, 3.5 Hz, 1H),

7.63 (dd,  $J = 8.3, 4.2$  Hz, 1H), 4.17 (dq,  $J = 8.7, 7.1, 3.8$  Hz, 4H), 1.24 (t,  $J = 7.1$  Hz, 6H).  $^{13}\text{C}$  NMR (126 MHz, DMSO)  $\delta$  151.36, 147.86, 147.81, 137.18, 136.26, 136.20, 133.55, 133.52, 129.46, 128.43, 128.35, 127.98, 126.46, 126.33, 122.54, 62.33, 62.28, 16.79, 16.74.  $^{31}\text{P}$  NMR (202 MHz, DMSO)  $\delta$  16.00. HRMS (ESI): Calcd for  $\text{C}_{13}\text{H}_{17}\text{NO}_3\text{P}$ :  $[\text{M}+\text{H}]^+$  266.0946, found:  $m/z$  266.0934.

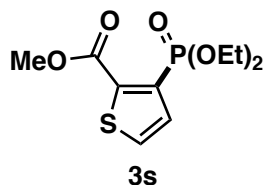

Colorless oil, 83% yield, (70% for one-pot).  $^1\text{H}$  NMR (500 MHz,  $\text{DMSO}-d_6$ )  $\delta$  8.00 (dd,  $J = 5.1, 3.0$  Hz, 1H), 7.42 (t,  $J = 4.8$  Hz, 1H), 4.10 (dq,  $J = 8.6, 7.0, 1.3$  Hz, 4H), 3.85 (s, 3H), 1.26 (t,  $J = 7.0$  Hz, 6H).  $^{13}\text{C}$  NMR (126 MHz, DMSO)  $\delta$  161.03, 161.01, 138.47, 138.35, 135.64, 134.11, 133.91, 133.80, 133.08, 132.93, 62.65, 62.60, 53.16, 16.67, 16.62.  $^{31}\text{P}$  NMR (202 MHz, DMSO)  $\delta$  9.20. HRMS (ESI): Calcd for  $\text{C}_{10}\text{H}_{16}\text{O}_5\text{PS}$ :  $[\text{M}+\text{H}]^+$  279.0456, found:  $m/z$  279.0445.

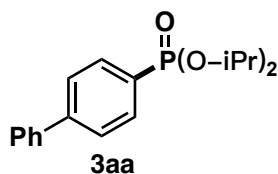

Colorless oil, 82% yield, (75% for one-pot).  $^1\text{H}$  NMR (500 MHz,  $\text{CDCl}_3$ )  $\delta$  7.92 – 7.85 (m, 2H), 7.69 – 7.65 (m, 2H), 7.63 – 7.58 (m, 2H), 7.50 – 7.44 (m, 2H), 7.43 – 7.35 (m, 1H), 4.72 (dp,  $J = 7.8, 6.2$  Hz, 2H), 1.39 (d,  $J = 6.2$  Hz, 6H), 1.26 (d,  $J = 6.2$  Hz, 6H). These data are in agreement with literature data.<sup>16</sup>

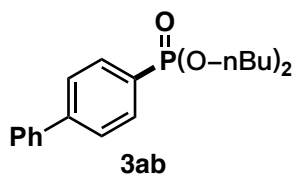

Colorless oil, 90% yield, (84% for one-pot).  $^1\text{H}$  NMR (500 MHz,  $\text{DMSO}-d_6$ )  $\delta$  7.88 – 7.80 (m, 2H), 7.82 – 7.76 (m, 2H), 7.76 – 7.71 (m, 2H), 7.51 (dd,  $J = 8.4, 6.9$  Hz, 2H), 7.47 – 7.40 (m, 1H), 4.06 – 3.92 (m, 4H), 1.60 (dq,  $J = 8.5, 6.5$  Hz, 4H), 1.41 – 1.30 (m, 4H), 0.87 (t,  $J = 7.4$  Hz, 6H).  $^{13}\text{C}$  NMR (126 MHz, DMSO)  $\delta$  144.46, 144.44, 139.41, 132.44, 132.36, 129.56, 128.80, 128.32, 127.47, 127.44, 127.35, 126.82, 65.68, 65.63, 32.40, 32.36, 18.71, 13.84.  $^{31}\text{P}$  NMR (202 MHz, DMSO)  $\delta$  17.96. HRMS (ESI): Calcd for  $\text{C}_{20}\text{H}_{28}\text{O}_3\text{P}$ :  $[\text{M}+\text{H}]^+$  347.1776, found:  $m/z$  347.1763.

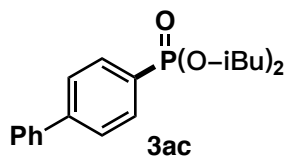

Colorless oil, 87% yield, (82% for one-pot).  $^1\text{H}$  NMR (500 MHz,  $\text{DMSO}-d_6$ )  $\delta$  7.88 – 7.77 (m, 4H), 7.76 – 7.71 (m, 2H), 7.51 (dd,  $J = 8.4, 6.9$  Hz, 2H), 7.47 – 7.40 (m, 1H), 3.77 (qt,  $J = 9.8, 6.6$  Hz, 4H), 1.89 (dh,  $J = 13.2, 6.6$  Hz, 2H), 0.90 (d,  $J = 6.7$  Hz, 12H).  $^{13}\text{C}$  NMR (126 MHz, DMSO)  $\delta$



144.46, 144.44, 139.40, 132.45, 132.37, 129.58, 128.83, 128.24, 127.50, 127.45, 127.38, 126.73, 71.80, 71.75, 29.17, 29.12, 18.99.  $^{31}\text{P}$  NMR (202 MHz, DMSO)  $\delta$  17.75. HRMS (ESI): Calcd for  $\text{C}_{20}\text{H}_{28}\text{O}_3\text{P}$ :  $[\text{M}+\text{H}]^+$  347.1776, found:  $m/z$  347.1770.

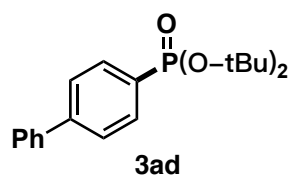

Colorless oil, 80% yield, (73% for one-pot).  $^1\text{H}$  NMR (500 MHz,  $\text{DMSO}-d_6$ )  $\delta$  7.80 – 7.74 (m, 4H), 7.73 – 7.68 (m, 2H), 7.49 (dd,  $J = 8.4, 6.9$  Hz, 2H), 7.44 – 7.38 (m, 1H), 1.42 (s, 18H).  $^{13}\text{C}$  NMR (126 MHz, DMSO)  $\delta$  143.49, 143.47, 139.64, 133.70, 132.16, 132.07, 131.99, 129.50, 128.60, 127.38, 127.09, 126.97, 82.22, 82.16, 30.56, 30.53.  $^{31}\text{P}$  NMR (202 MHz, DMSO)  $\delta$  9.76. HRMS (ESI): Calcd for  $\text{C}_{20}\text{H}_{28}\text{O}_3\text{P}$ :  $[\text{M}+\text{H}]^+$  347.1776, found:  $m/z$  347.1768.

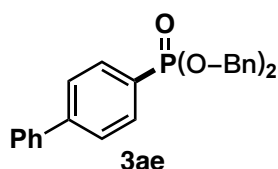

Colorless oil, 52% yield, (47% for one-pot).  $^1\text{H}$  NMR (500 MHz,  $\text{DMSO}-d_6$ )  $\delta$  7.89 – 7.82 (m, 4H), 7.75 – 7.70 (m, 2H), 7.51 (dd,  $J = 8.5, 6.9$  Hz, 2H), 7.45 – 7.41 (m, 1H), 7.40 – 7.31 (m, 10H), 5.10 (d,  $J = 8.0$  Hz, 4H).  $^{13}\text{C}$  NMR (126 MHz, DMSO)  $\delta$  144.71, 144.68, 139.36, 136.86, 136.81, 132.55, 132.47, 129.59, 128.95, 128.88, 128.71, 128.25, 127.79, 127.57, 127.47, 127.45, 126.28, 67.50, 67.46.  $^{31}\text{P}$  NMR (202 MHz, DMSO)  $\delta$  18.96. HRMS (ESI): Calcd for  $\text{C}_{26}\text{H}_{24}\text{O}_3\text{P}$ :  $[\text{M}+\text{H}]^+$  415.1463, found:  $m/z$  415.1456.

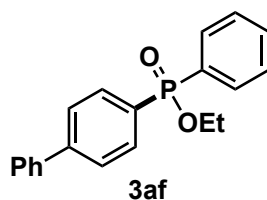

Colorless oil, 93% yield, (97% for one-pot).  $^1\text{H}$  NMR (500 MHz,  $\text{DMSO}-d_6$ )  $\delta$  7.88 – 7.78 (m, 6H), 7.72 – 7.66 (m, 2H), 7.62 – 7.57 (m, 1H), 7.54 (ddd,  $J = 8.5, 6.5, 3.4$  Hz, 2H), 7.48 (dd,  $J = 8.4, 6.9$  Hz, 2H), 7.43 – 7.37 (m, 1H), 4.06 – 3.97 (m, 2H), 1.29 (t,  $J = 7.0$  Hz, 3H).  $^{13}\text{C}$  NMR (126 MHz, DMSO)  $\delta$  144.28, 144.26, 139.45, 132.88, 132.74, 132.72, 132.43, 132.35, 131.80, 131.75, 131.67, 131.57, 130.48, 129.54, 129.34, 129.23, 128.78, 127.58, 127.48, 127.46, 61.31, 61.26, 40.51, 40.43, 40.34, 40.26, 40.17, 40.09, 40.00, 39.93, 39.84, 39.67, 39.51, 16.85, 16.80.  $^{31}\text{P}$  NMR (202 MHz, DMSO)  $\delta$  29.52. HRMS (ESI): Calcd for  $\text{C}_{20}\text{H}_{20}\text{O}_2\text{P}$ :  $[\text{M}+\text{H}]^+$  323.1201, found:  $m/z$  323.1197.

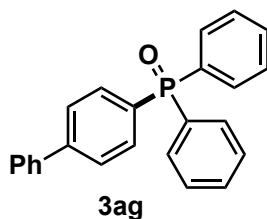

White solid, 90% yield, (91% for one-pot).  $^1\text{H}$  NMR (500 MHz, Chloroform-*d*)  $\delta$  7.75 (tt,  $J = 17.1$ , 8.1 Hz, 8H), 7.65 – 7.56 (m, 4H), 7.53 – 7.45 (m, 6H), 7.42 (t,  $J = 7.3$  Hz, 1H). These data are in agreement with literature data.<sup>17</sup>

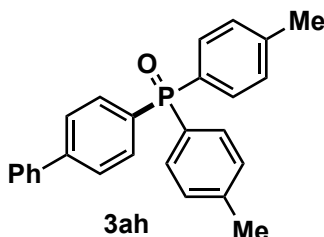

White solid, 91% yield, (88% for one-pot).  $^1\text{H}$  NMR (500 MHz, DMSO-*d*<sub>6</sub>)  $\delta$  7.81 (dd,  $J = 8.2$ , 2.4 Hz, 2H), 7.72 – 7.63 (m, 4H), 7.57 – 7.50 (m, 4H), 7.47 (dd,  $J = 8.4$ , 6.9 Hz, 2H), 7.42 – 7.37 (m, 1H), 7.34 (dd,  $J = 8.2$ , 2.6 Hz, 4H), 2.34 (s, 6H).  $^{13}\text{C}$  NMR (126 MHz, DMSO)  $\delta$  143.86, 143.84, 142.53, 142.51, 139.45, 132.98, 132.62, 132.54, 132.16, 132.04, 131.96, 130.64, 129.85, 129.80, 129.75, 129.54, 128.75, 127.45, 127.42, 127.32, 21.55.  $^{31}\text{P}$  NMR (202 MHz, DMSO)  $\delta$  25.58. HRMS (ESI): Calcd for C<sub>26</sub>H<sub>24</sub>OP: [M+H]<sup>+</sup> 383.1563, found: m/z 383.1558

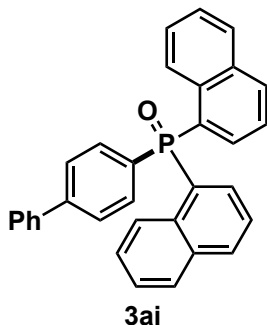

White solid, 90% yield.  $^1\text{H}$  NMR (500 MHz, CDCl<sub>3</sub>)  $\delta$  8.83 (d,  $J = 8.2$  Hz, 2H), 8.06 – 7.97 (m, 2H), 7.93 (d,  $J = 7.9$  Hz, 2H), 7.77 (dd,  $J = 11.8$ , 7.7 Hz, 2H), 7.69 (d,  $J = 7.4$  Hz, 2H), 7.62 (d,  $J = 7.6$  Hz, 2H), 7.53 (t,  $J = 7.3$  Hz, 2H), 7.51 – 7.36 (m, 4H), 7.41 – 7.28 (m, 5H).  $^{13}\text{C}$  NMR (126 MHz, CDCl<sub>3</sub>)  $\delta$  139.89, 134.07, 133.32, 132.98, 128.97, 128.83, 128.18, 127.99, 127.52, 127.30, 126.62, 124.30.  $^{31}\text{P}$  NMR (202 MHz, CDCl<sub>3</sub>)  $\delta$  36.35. HRMS (ESI): Calcd for C<sub>32</sub>H<sub>24</sub>OP: [M+H]<sup>+</sup> 455.1565, found: m/z 455.1559.

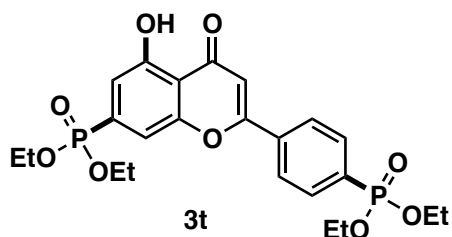

Yellow solid, 90% yield, (93% for one-pot).  $^1\text{H}$  NMR (500 MHz,  $\text{DMSO-}d_6$ )  $\delta$  12.57 (s, 1H), 8.27 (dd,  $J = 8.1, 3.5$  Hz, 2H), 7.83 (dd,  $J = 12.7, 7.9$  Hz, 2H), 7.49 (d,  $J = 14.5$  Hz, 1H), 7.25 (s, 1H), 6.97 (d,  $J = 14.0$  Hz, 1H), 4.03 (dddt,  $J = 14.8, 9.3, 7.1, 2.7$  Hz, 8H), 1.21 (dt,  $J = 10.0, 7.0$  Hz, 12H).  $^{13}\text{C}$  NMR (126 MHz, DMSO)  $\delta$  183.48, 163.90, 160.37, 160.20, 156.21, 156.01, 137.48, 136.02, 134.36, 134.33, 133.63, 132.37, 132.29, 132.16, 127.56, 127.44, 113.23, 113.15, 112.87, 112.85, 111.11, 111.02, 107.96, 62.94, 62.90, 62.57, 62.53, 40.57, 40.47, 40.40, 40.31, 40.23, 40.14, 39.97, 39.90, 39.81, 39.64, 39.47, 16.66, 16.61.  $^{31}\text{P}$  NMR (202 MHz, DMSO)  $\delta$  16.13, 14.46. HRMS (ESI): Calcd for  $\text{C}_{23}\text{H}_{29}\text{O}_9\text{P}_2$ :  $[\text{M}+\text{H}]^+$  511.1287, found:  $m/z$  511.1280.

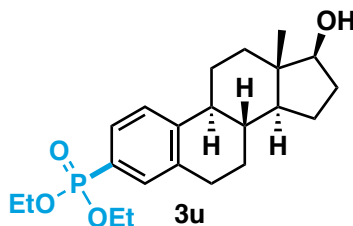

White solid, 92% yield, (83% for one-pot).  $^1\text{H}$  NMR (500 MHz,  $\text{DMSO-}d_6$ )  $\delta$  7.46 – 7.35 (m, 3H), 4.52 (s, 1H), 4.05 – 3.90 (m, 4H), 3.53 (t,  $J = 8.5$  Hz, 1H), 2.85 (dt,  $J = 9.3, 4.6$  Hz, 2H), 2.32 (dd,  $J = 14.0, 4.0$  Hz, 1H), 2.23 (ddd,  $J = 13.8, 10.6, 3.9$  Hz, 1H), 1.86 (dddd,  $J = 23.8, 12.1, 8.9, 4.1$  Hz, 3H), 1.60 (dddd,  $J = 12.2, 9.8, 6.9, 3.2$  Hz, 1H), 1.45 – 1.35 (m, 3H), 1.35 – 1.24 (m, 2H), 1.22 (td,  $J = 7.0, 1.1$  Hz, 8H), 0.67 (s, 3H).  $^{13}\text{C}$  NMR (126 MHz, DMSO)  $\delta$  145.45, 137.47, 137.35, 132.19, 132.10, 128.88, 128.81, 126.38, 126.19, 126.07, 124.89, 80.44, 61.93, 61.89, 50.09, 44.53, 43.20, 38.34, 36.97, 30.32, 29.22, 26.93, 26.03, 23.22, 16.69, 16.64, 11.64.  $^{31}\text{P}$  NMR (202 MHz, DMSO)  $\delta$  18.68. HRMS (ESI): Calcd for  $\text{C}_{22}\text{H}_{34}\text{O}_4\text{P}$ :  $[\text{M}+\text{H}]^+$  393.2195, found:  $m/z$  393.2188.

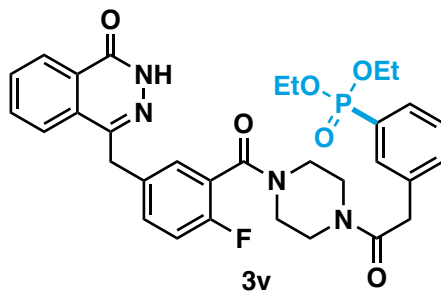

Brown solid, 85% yield, (81% for one-pot).  $^1\text{H}$  NMR (500 MHz,  $\text{DMSO-}d_6$ )  $\delta$  12.60 (s, 1H), 8.27 (d,  $J = 7.7$  Hz, 1H), 7.96 (d,  $J = 8.0$  Hz, 1H), 7.92 – 7.80 (m, 2H), 7.59 (dd,  $J = 14.3, 10.7$  Hz, 2H), 7.46 (ddt,  $J = 15.3, 7.4, 3.8$  Hz, 3H), 7.37 (ddd,  $J = 11.3, 6.4, 2.3$  Hz, 1H), 7.24 (t,  $J = 9.0$  Hz, 1H), 4.33 (s, 2H), 4.00 (dt,  $J = 14.8, 7.3$  Hz, 4H), 3.87 (s, 1H), 3.80 (s, 1H), 3.58 (d,  $J = 16.4$  Hz, 4H), 3.43 (dt,  $J = 19.8, 5.1$  Hz, 2H), 3.18 – 3.13 (m, 2H), 1.21 (dt,  $J = 10.6, 7.0$  Hz, 6H).  $^{13}\text{C}$  NMR (126 MHz, DMSO)  $\delta$  169.32, 164.58, 159.87, 155.90, 145.32, 136.96, 135.35, 134.03, 133.96, 132.58, 132.29, 132.05, 129.83, 129.75, 129.55, 129.43, 129.19, 129.06, 128.38, 128.05, 126.56, 125.92, 124.09, 116.50, 116.33, 62.14, 62.09, 46.99, 46.69, 45.83, 45.36, 41.98, 41.69, 41.39, 36.92, 16.65, 16.60.  $^{19}\text{F}$  NMR (471 MHz, DMSO)  $\delta$  -119.77.  $^{31}\text{P}$  NMR (202 MHz, DMSO)  $\delta$  18.04, 18.01. HRMS (ESI): Calcd for  $\text{C}_{32}\text{H}_{35}\text{FN}_4\text{O}_6\text{P}$ :  $[\text{M}+\text{H}]^+$  621.2278, found:  $m/z$  621.2272.

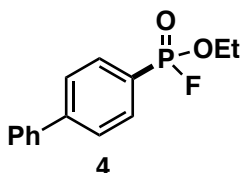

Colorless oil, 35% yield.  $^1\text{H}$  NMR (500 MHz, DMSO)  $\delta$  7.92 (d,  $J$  = 11.5 Hz, 4H), 7.76 (d,  $J$  = 7.6 Hz, 2H), 7.54 (t,  $J$  = 7.5 Hz, 2H), 7.47 (t,  $J$  = 7.3 Hz, 1H), 4.36 – 4.27 (m, 2H), 1.35 (t,  $J$  = 7.0 Hz, 3H).  $^{13}\text{C}$  NMR (126 MHz, DMSO)  $\delta$  146.02, 145.99, 139.01, 132.65, 132.56, 129.66, 129.19, 127.96, 127.83, 127.60, 124.14, 123.89, 122.54, 122.30, 64.70, 64.65, 16.62, 16.57.  $^{31}\text{P}$  NMR (202 MHz, DMSO)  $\delta$  17.06 (d,  $J$  = 1031.4 Hz).  $^{19}\text{F}$  NMR (376 MHz, DMSO)  $\delta$  -63.25 (d,  $J$  = 1031.4 Hz). HRMS (ESI): Calcd for  $\text{C}_{14}\text{H}_{15}\text{FO}_2\text{P}$ :  $[\text{M}+\text{H}]^+$  265.0794, found:  $m/z$  265.0787.

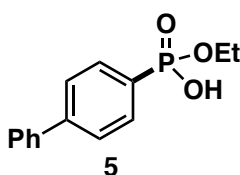

Colorless oil, 15% yield.  $^1\text{H}$  NMR (500 MHz, DMSO- $d_6$ )  $\delta$  7.81 – 7.74 (m, 4H), 7.73 – 7.68 (m, 2H), 7.49 (dd,  $J$  = 8.4, 6.9 Hz, 2H), 7.44 – 7.37 (m, 1H), 3.96 – 3.87 (m, 2H), 1.19 (t,  $J$  = 7.1 Hz, 3H).  $^{13}\text{C}$  NMR (126 MHz, DMSO)  $\delta$  143.67, 143.64, 139.66, 132.18, 132.10, 131.22, 129.76, 129.54, 128.64, 127.39, 127.18, 127.07, 61.20, 61.16, 40.55, 40.46, 40.38, 40.29, 40.21, 40.12, 40.05, 39.95, 39.88, 39.79, 39.62, 39.45, 16.75, 16.70.  $^{31}\text{P}$  NMR (202 MHz, DMSO)  $\delta$  14.99, 14.98. HRMS (ESI): Calcd for  $\text{C}_{14}\text{H}_{16}\text{O}_3\text{P}$ :  $[\text{M}+\text{H}]^+$  263.0837, found:  $m/z$  263.0823.

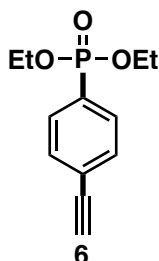

To a mixture of **3f** (87 mg, 0.3 mmol),  $\text{Pd}(\text{OAc})_2$  (6.7 mg, 0.03 mmol) and  $\text{CuI}$  (11 mg, 0.06 mmol) in triethylamine ( $\text{Et}_3\text{N}$ ) (1.5 mL) was added (trimethylsilyl)acetylene (85  $\mu\text{L}$ , 0.6 mmol). The reaction mixture was stirred under argon atmosphere at 60  $^\circ\text{C}$  for 6 h. After filtration, the filtrate was evaporated under reduced pressure, and dissolved in MeOH (1.5 mL). After that  $\text{K}_2\text{CO}_3$  (124 mg, 0.9 mmol) was added. The mixture was stirred at room temperature for 3 h. After filtration, the filtrate was evaporated under reduced pressure. The crude product was diluted with dichloromethane, and was washed with water, and the dichloromethane layer was dried over  $\text{MgSO}_4$ . After the solvent was removed, the residue was purified by flash chromatography to give 46 mg of **6** as colorless oil in 65% yield.  $^1\text{H}$  NMR (500 MHz,  $\text{CDCl}_3$ )  $\delta$  7.83 – 7.75 (m, 2H), 7.62 – 7.54 (m, 2H), 4.25 – 4.03 (m, 4H), 3.26 (s, 1H), 1.33 (t,  $J$  = 7.0 Hz, 6H). These data are in agreement with literature data.<sup>18</sup>

### III. The stability of **1a** in the presence of TMSOH.

**Procedure:** To a solution of **1a** (0.2 mmol) in CH<sub>3</sub>CN (1 mL) was added TMSOH (0.6 mmol) and DIPEA (0.4 mmol). The mixture was stirred at room temperature and analysis by LC-MS at 0.5h, 1h and 3h.

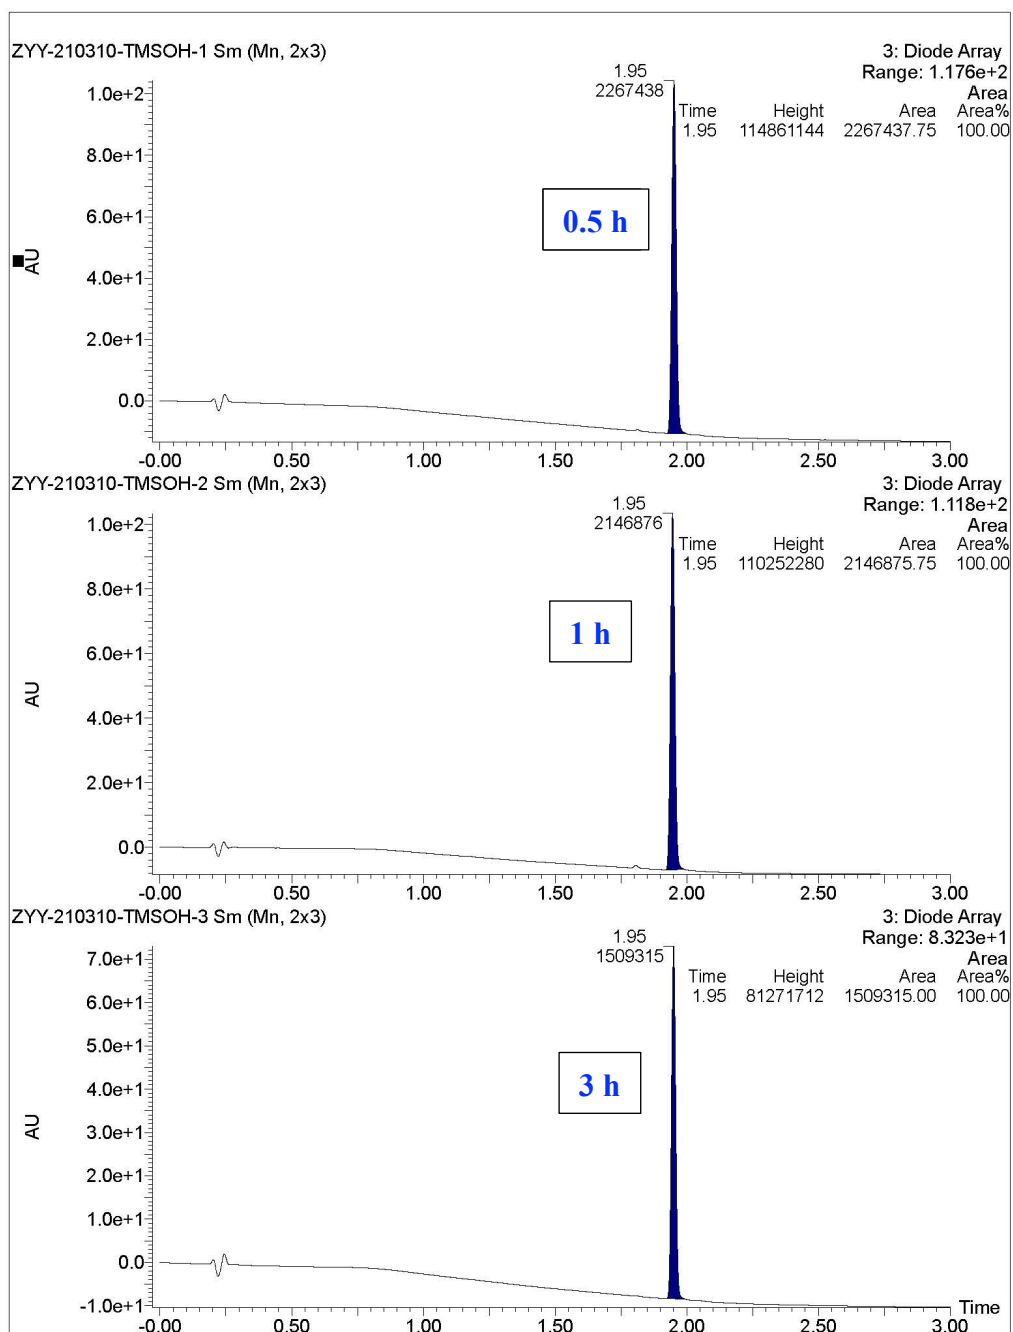

Figure 1. LC-MS analysis of the stability of **1a** in the presence of TMSOH and DIPEA.

#### IV. Synthesis of enantiomerically pure P-chiral 3aj.

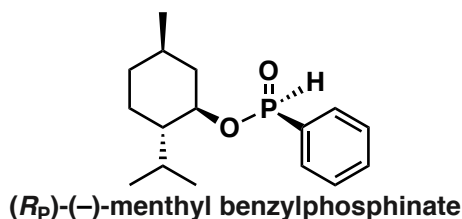

**Synthesis of (Rp)-(-)-menthyl benzylphosphinate.** (the synthesis was according to the literature procedures with slightly modification<sup>19-21</sup>) A solution of (-)-menthol (50 g, 0.32 mol) and pyridine (25 mL, 0.32 mol) in hexane (150 mL) was added dropwise to dichlorophenylphosphine (44 mL g, 0.32 mol) in hexane (150 mL) at 0°C. After stirring at room temperature for 12 hours, the resulting pyridine hydrochloride was removed by filtration, and water (100 mL) was added slowly at 0°C. The two layers were separated, and the organic phase was washed with aqueous sodium bicarbonate solution (50 mL), dried over anhydrous Na<sub>2</sub>SO<sub>4</sub>, filtrated, and concentrated under reduced pressure to give 79 g of menthyl hydrogenophenylphosphinate with about 38% diastereomeric excess. The crude product was then diluted in hexane (10 mL) and stored at -40°C for 48h. The first batch was collected. After a second crystallization in hexane, 12.3 g (14% yield) of (Rp)-(-)-menthyl benzylphosphinate was obtained. <sup>1</sup>H NMR (500 MHz, CDCl<sub>3</sub>) δ 7.66 (d, *J* = 552.5 Hz, 1H), 7.81 – 7.72 (m, 2H), 7.56 – 7.49 (m, 1H), 7.44 (td, *J* = 7.5, 3.2 Hz, 2H), 4.22 (qd, *J* = 10.5, 4.5 Hz, 1H), 2.20 – 2.07 (m, 2H), 1.69 (brs, 1H), 1.66 – 1.56 (m, 1H), 1.49 – 1.43 (m, 2H), 1.17 (td, *J* = 12.2, 10.9 Hz, 1H), 0.98 (qd, *J* = 13.6, 3.8 Hz, 1H), 0.89 (d, *J* = 7.0 Hz, 3H), 0.83 (d, *J* = 6.6 Hz, 3H), 0.79 (d, *J* = 6.9 Hz, 3H). <sup>31</sup>P NMR (202 MHz, CDCl<sub>3</sub>) δ 24.70. These data are in agreement with literature data.<sup>21</sup>

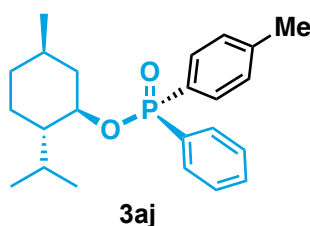

**3aj (white solid, 85 % yield) was synthesized by using the one-pot procedure.** <sup>1</sup>H NMR (500 MHz, CDCl<sub>3</sub>) δ 7.80 – 7.79 (m, 2H), 7.68 – 7.62 (m, 2H), 7.52 – 7.46 (m, 1H), 7.45 – 7.38 (m, 2H), 7.22 (dd, *J* = 8.0, 3.2 Hz, 2H), 4.27 – 4.17 (m, 1H), 2.37 (s, 3H), 2.18 – 2.06 (m, 2H), 1.66 – 1.59 (m, 2H), 1.47 – 1.30 (m, 2H), 1.20 (td, *J* = 12.2, 10.8 Hz, 1H), 1.02 – 0.91 (m, 1H), 0.88 (d, *J* = 7.1 Hz, 2H), 0.83 (d, *J* = 6.4 Hz, 3H), 0.54 (d, *J* = 6.9 Hz, 3H). <sup>31</sup>P NMR (202 MHz, DMSO) δ 16.13, 14.46. <sup>31</sup>P NMR (202 MHz, CDCl<sub>3</sub>) δ 29.77. These data are in agreement with literature data.<sup>22</sup>

## V. Synthesis of DNA conjugated phosphine oxide D2.

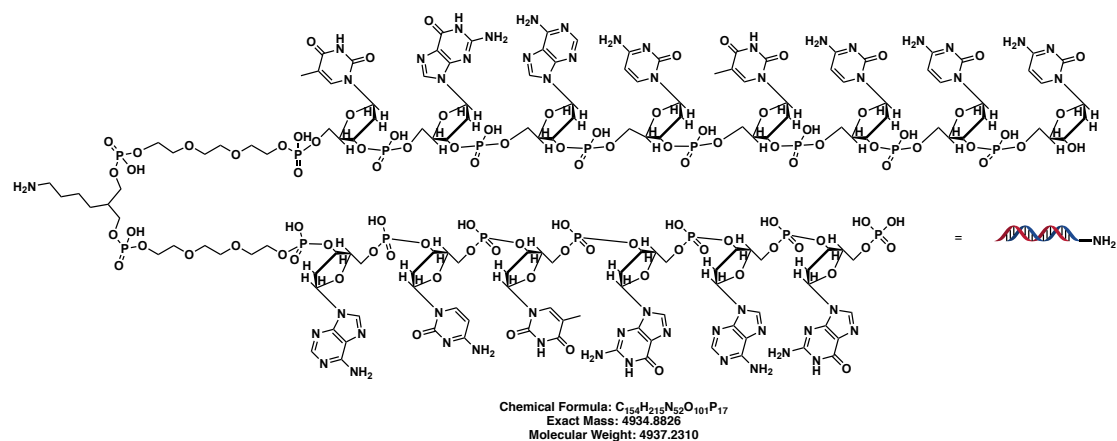

**Figure 2.** Structure of headpiece DNA (HP-DNA)

### Synthesis of DNA conjugated aryl fluorosulfate D1:

To a solution of DNA headpiece (100 nmol, 1 mM in water) in borate buffer 300  $\mu$ L (250 mM, pH = 9.4), was added a mixture of DMA solution of HATU (100  $\mu$ L, 200 mM in DMA), DIPEA (100  $\mu$ L, 400 mM in DMA) and acid (100  $\mu$ L, 200 mM in DMA). The resultant mixture was vortexed and incubated at 25  $^{\circ}$ C for 8 hours. Add 5 M NaCl solution (10% by volume) and cold ethanol (2.5 times by volume, ethanol stored at -20  $^{\circ}$ C) to the resultant supernatant. The mixture was vortexed and incubated at -80  $^{\circ}$ C for at least 30 minutes. The sample was centrifuged for 30 minutes at 4 $^{\circ}$ C in a microcentrifuge at 12,000 rpm to remove the supernatant. The resulting pellet (precipitate) was re-dissolved in ddH<sub>2</sub>O. Yield of **D1** 93.5%.

### Synthesis of DNA conjugated phosphine oxide D2:

To the DNA conjugated aryl fluorosulfate **D1** (5 nmol, 5  $\mu$ L, 1 mM in water), was added 500 equiv. of phosphines oxide (5  $\mu$ L, 500 mM in DMF) followed by 500 equiv. of DIPEA (5  $\mu$ L, 500 M in DMF), 20 equiv. of Pd(OAc)<sub>2</sub> (5  $\mu$ L, 20 mM in DMF), 40 equiv. of dppf (5  $\mu$ L, 40 mM in DMF) and 75 $\mu$ L ddH<sub>2</sub>O. The mixture was vortexed and incubated at 80  $^{\circ}$ C for 2 hours. After reaction, 30 equiv. of scavenger sodium diethyldithiocarbamic acid (compared with Pd(OAc)<sub>2</sub>, 3  $\mu$ L, 1 M in ddH<sub>2</sub>O) were added to the mixture, and the reaction mixture was heated at 60  $^{\circ}$ C for 30 minutes. The mixture was centrifuged at 4  $^{\circ}$ C for 10 min at 12,000 rpm, and the resultant supernatant was collected. Add 5 M NaCl solution (10% by volume) and cold ethanol (2.5 times by volume, ethanol stored at -20  $^{\circ}$ C) to the resultant supernatant. The mixture was vortexed and incubated at -80  $^{\circ}$ C for at least 30 minutes. The sample was centrifuged for 30 minutes at 4 $^{\circ}$ C in a microcentrifuge at 12,000 rpm to remove the supernatant. The resulting pellet (precipitate) was re-dissolved in ddH<sub>2</sub>O (300  $\mu$ L) for LC-MS detection.

$$\text{Yield of D2: } 78.1\% = \frac{73.04\% \text{ UV (product)}}{93.52\% \text{ UV (DNA starting material before reaction)}} \times 100\%$$

# LC-MS analysis of D1

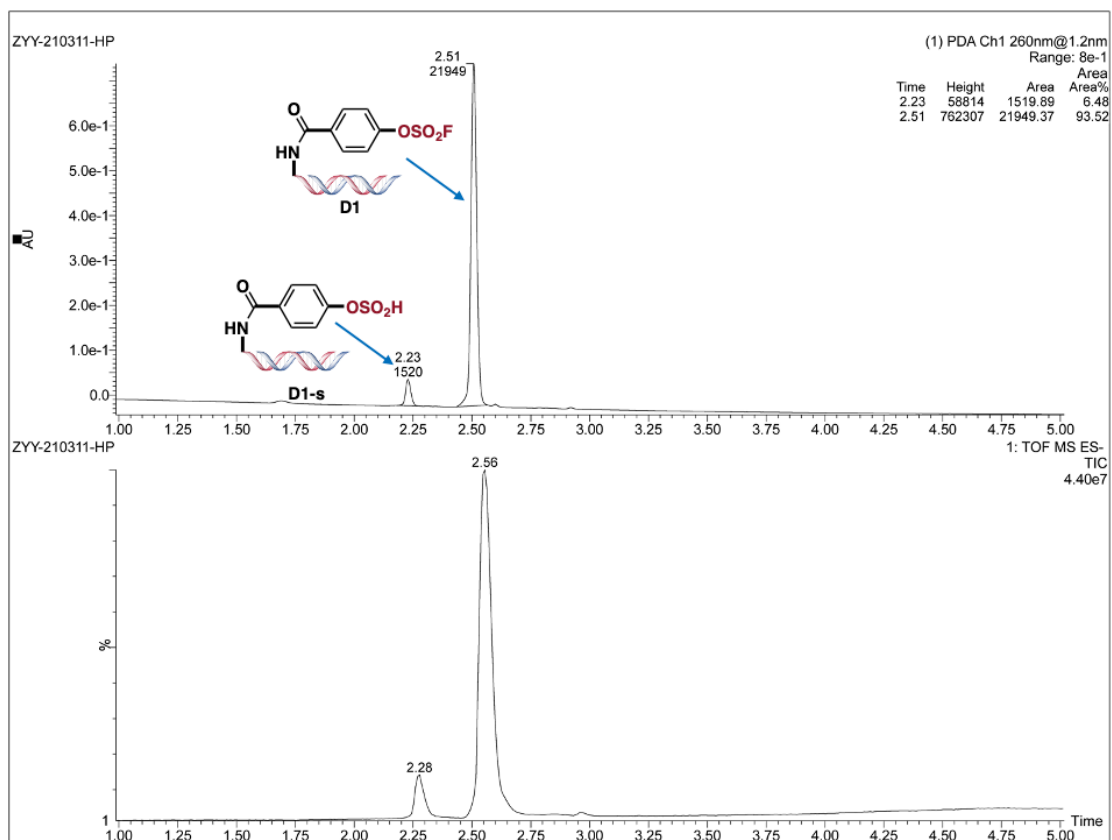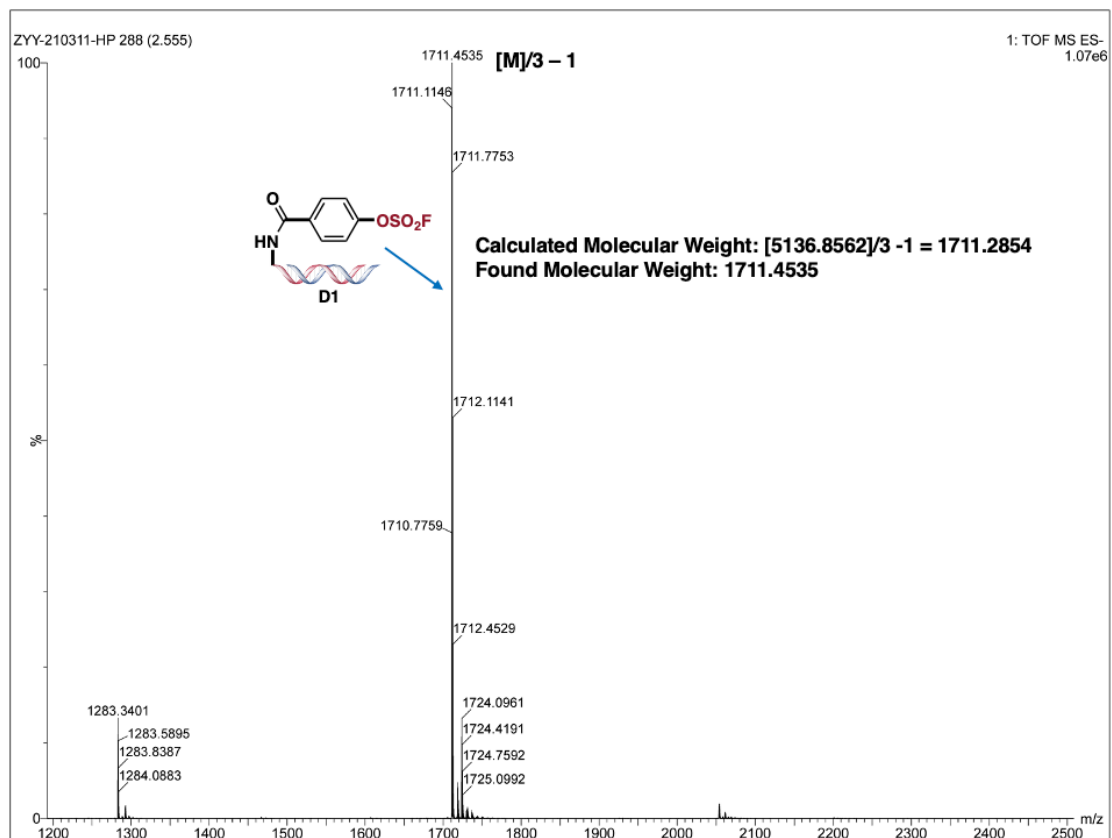



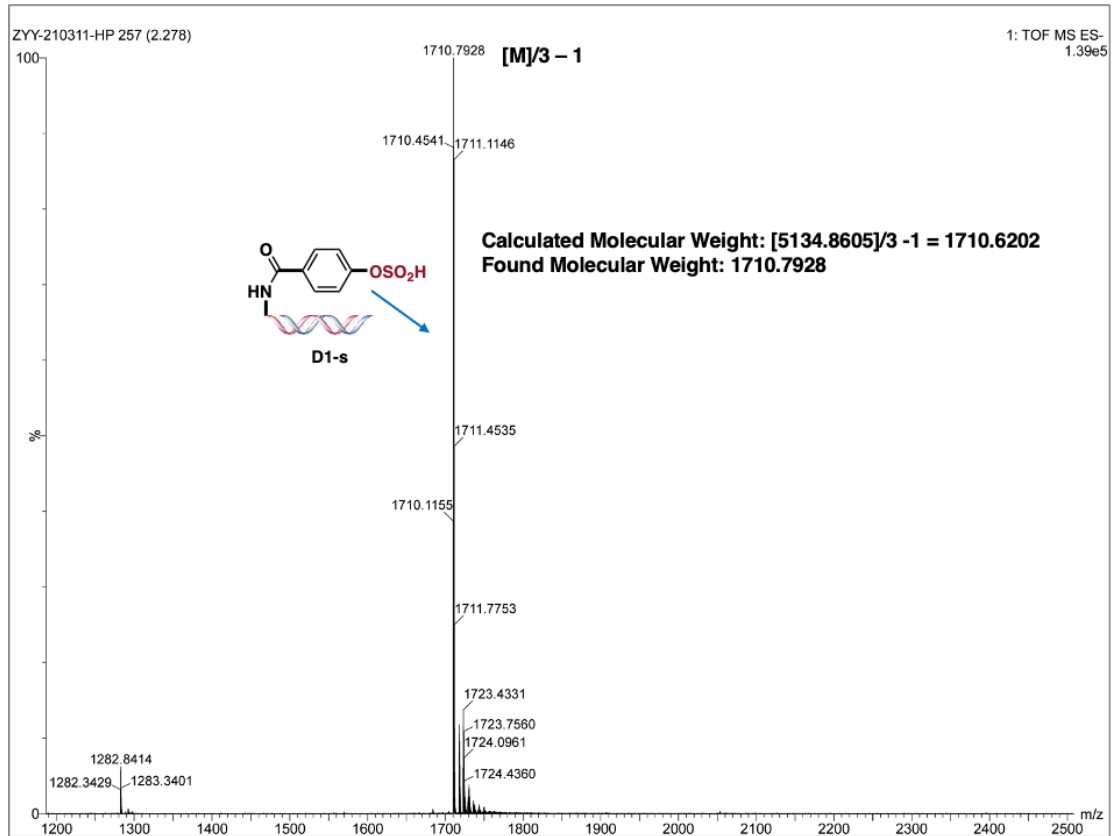

### LC-MS analysis of D2

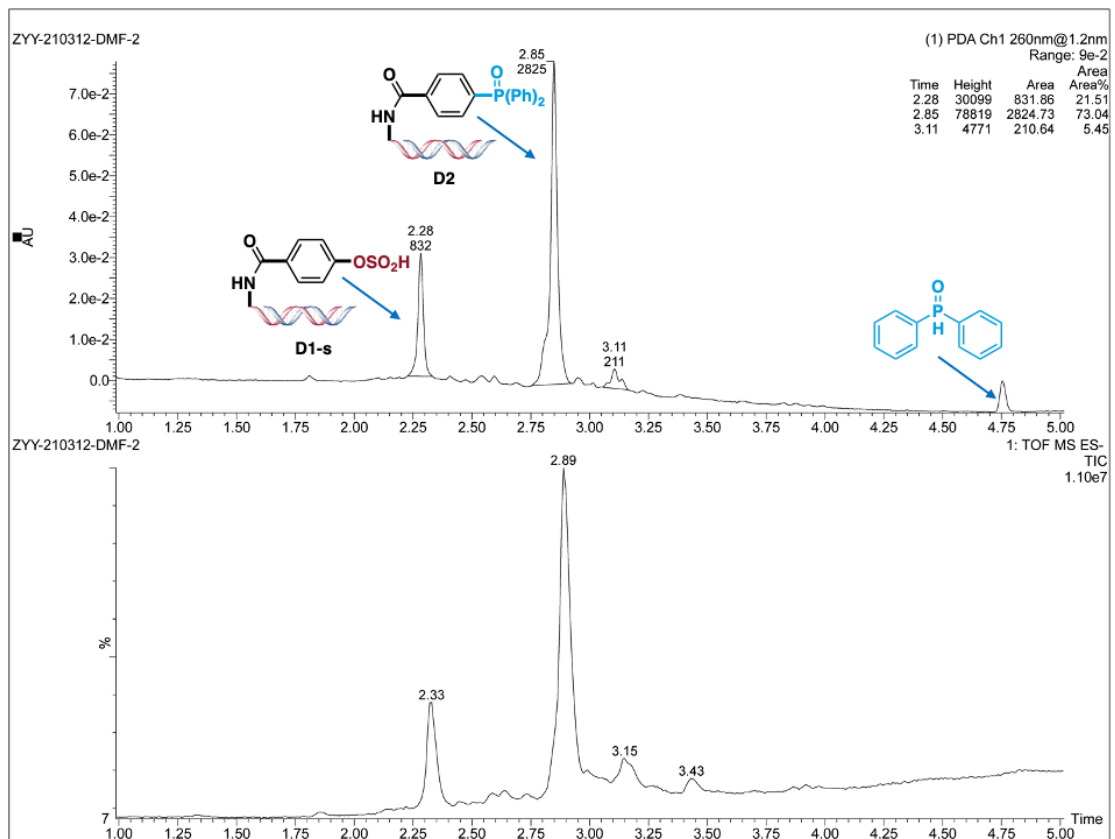

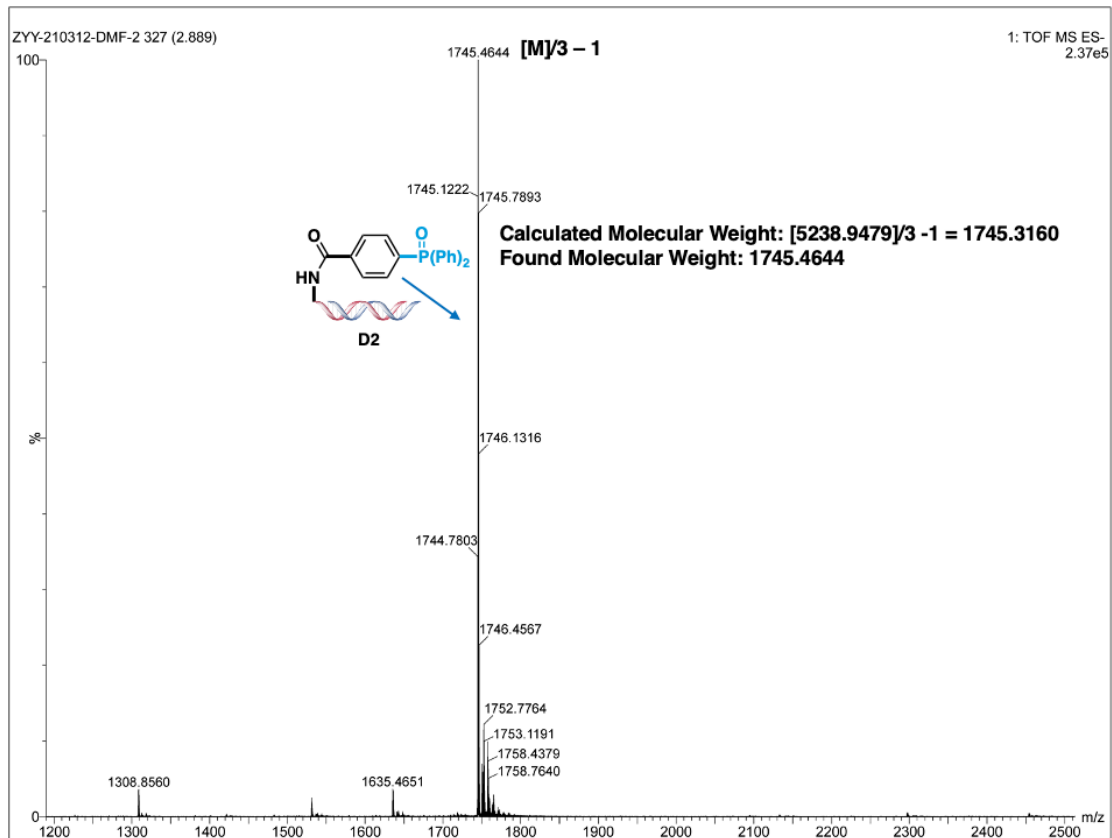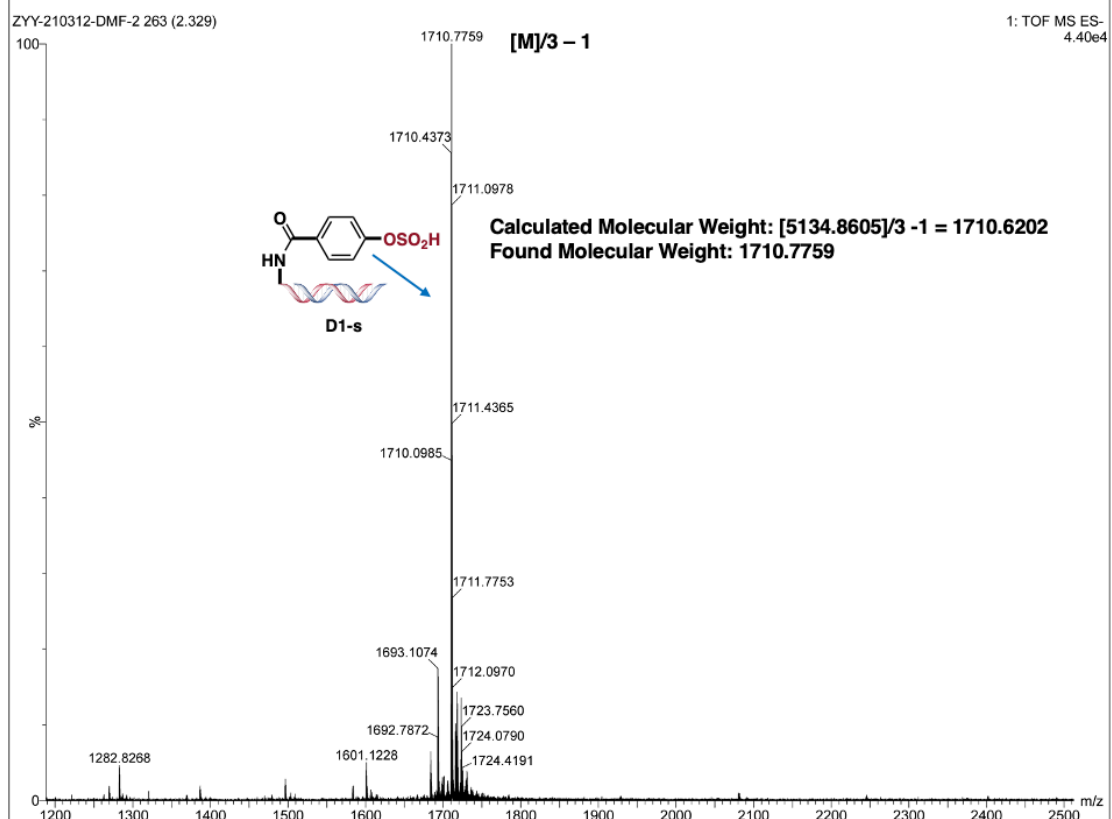

## VI. Copies of $^1\text{H}$ NMR, $^{13}\text{C}$ NMR, $^{31}\text{P}$ NMR $^{19}\text{F}$ NMR Spectra

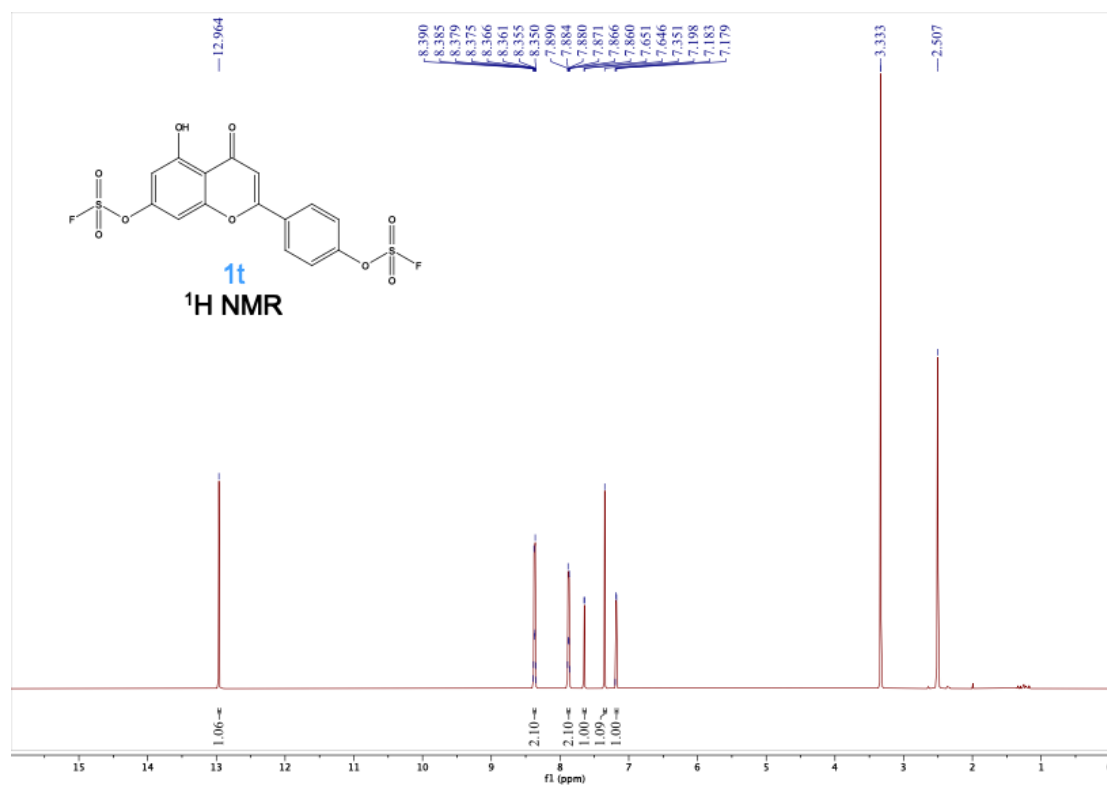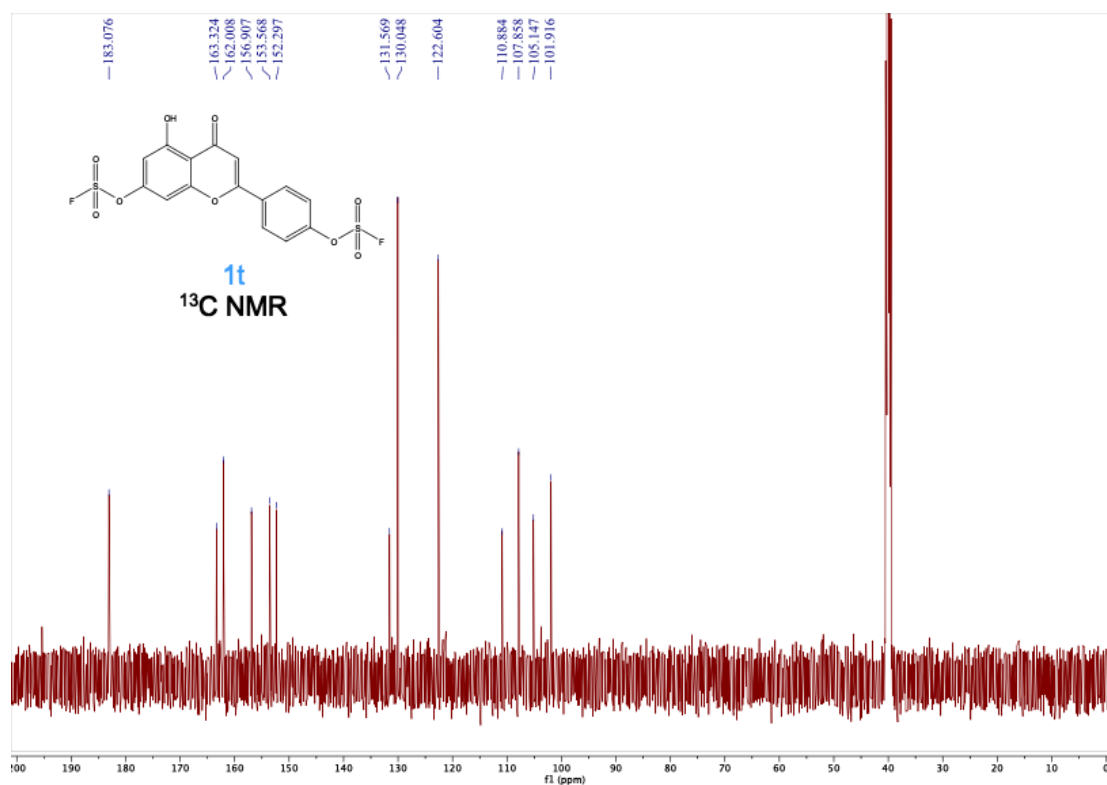

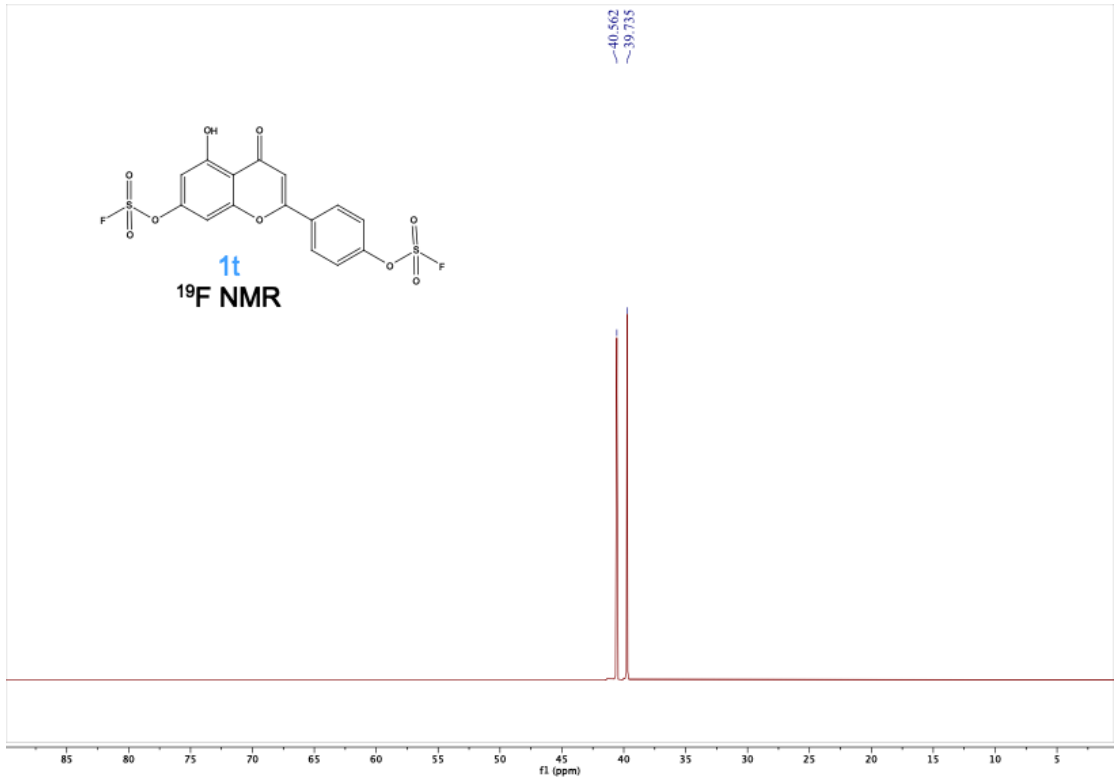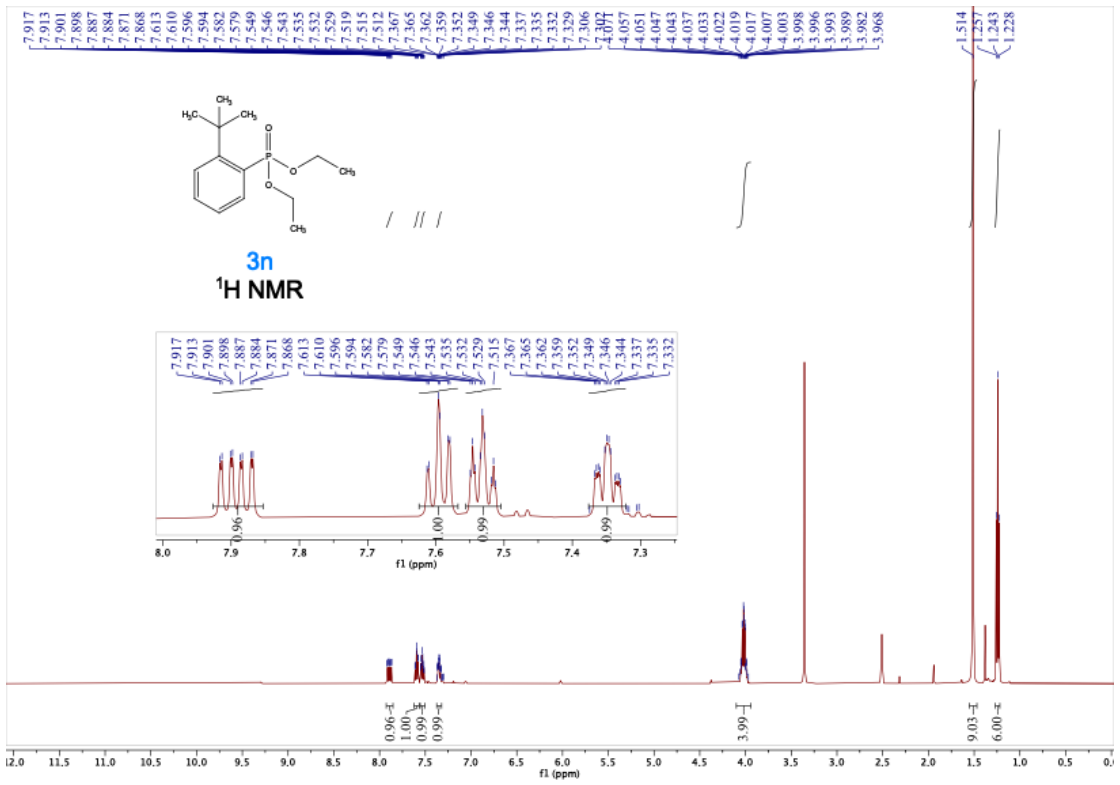

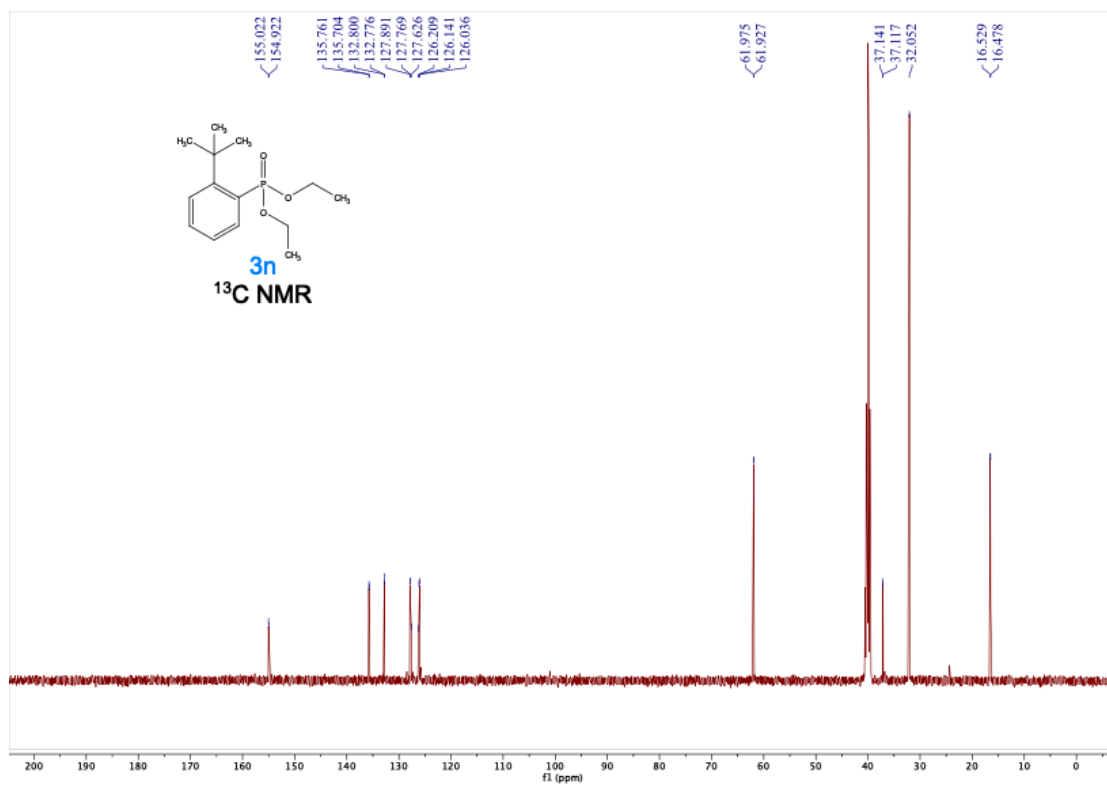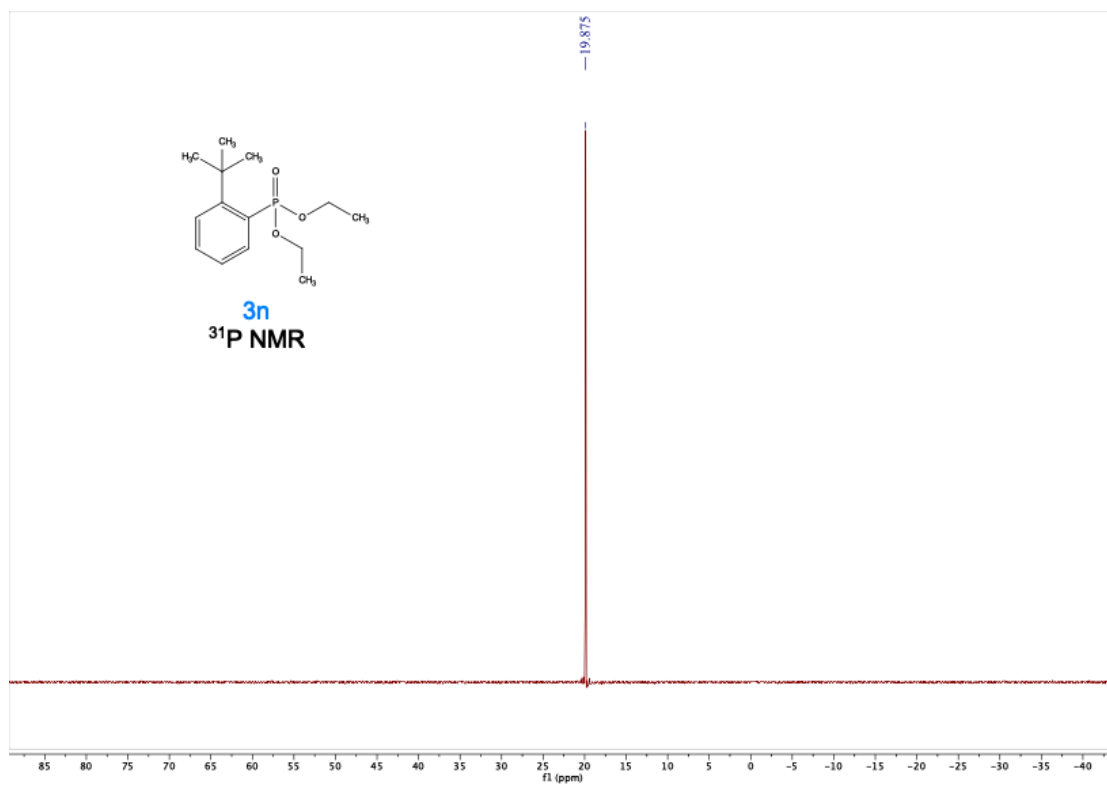

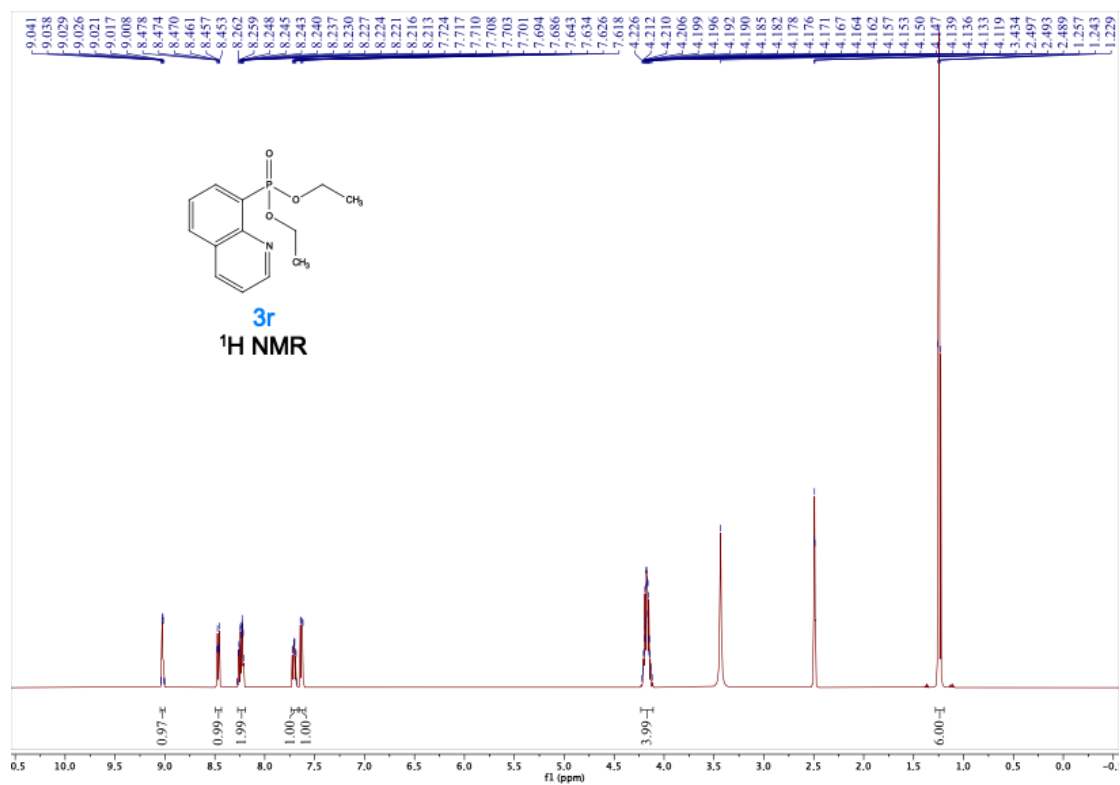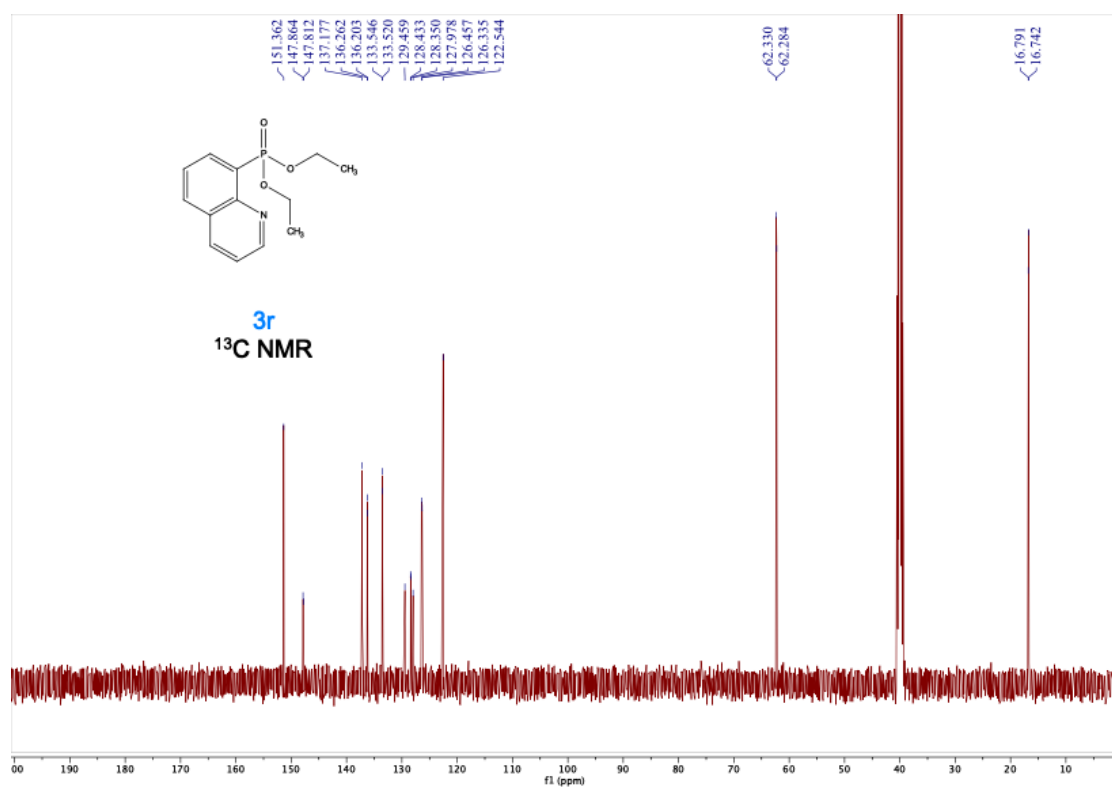

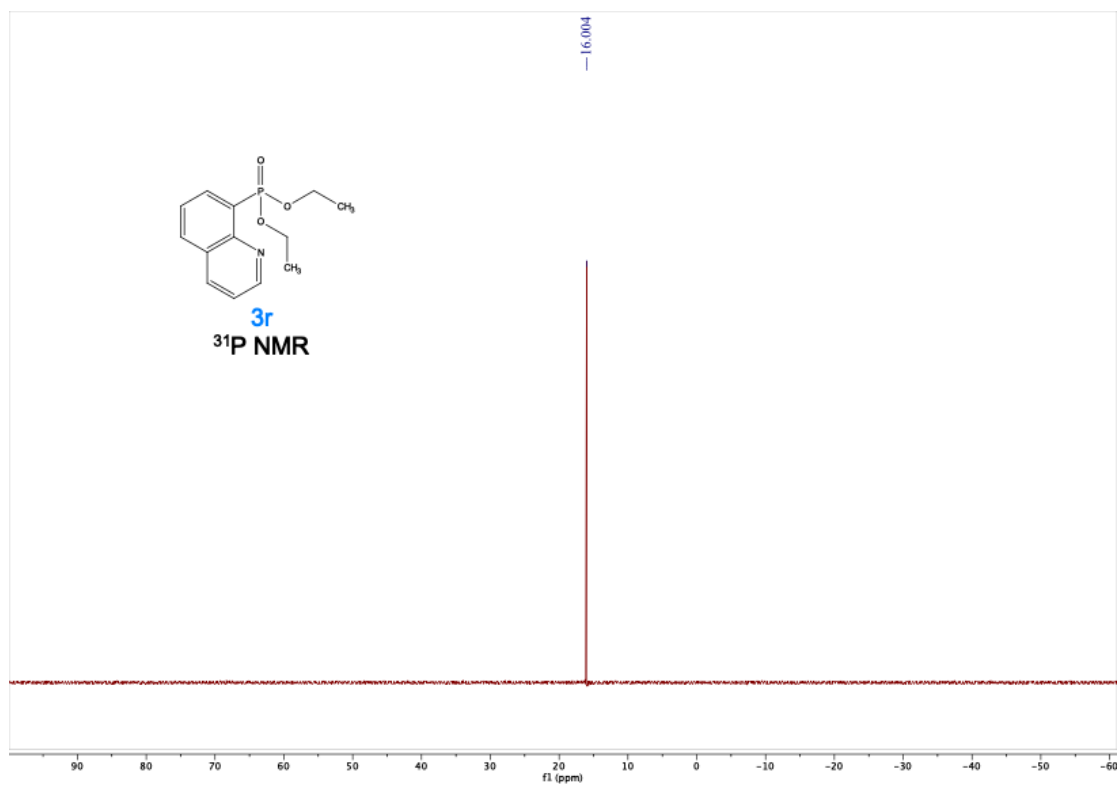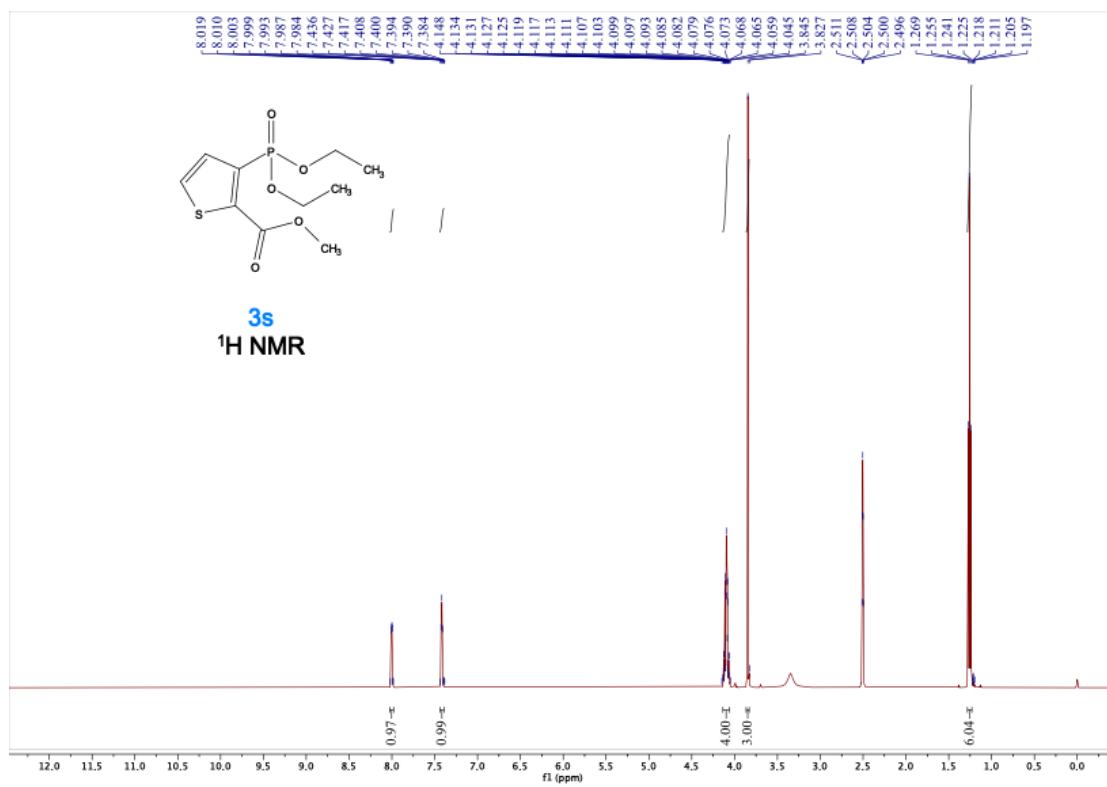

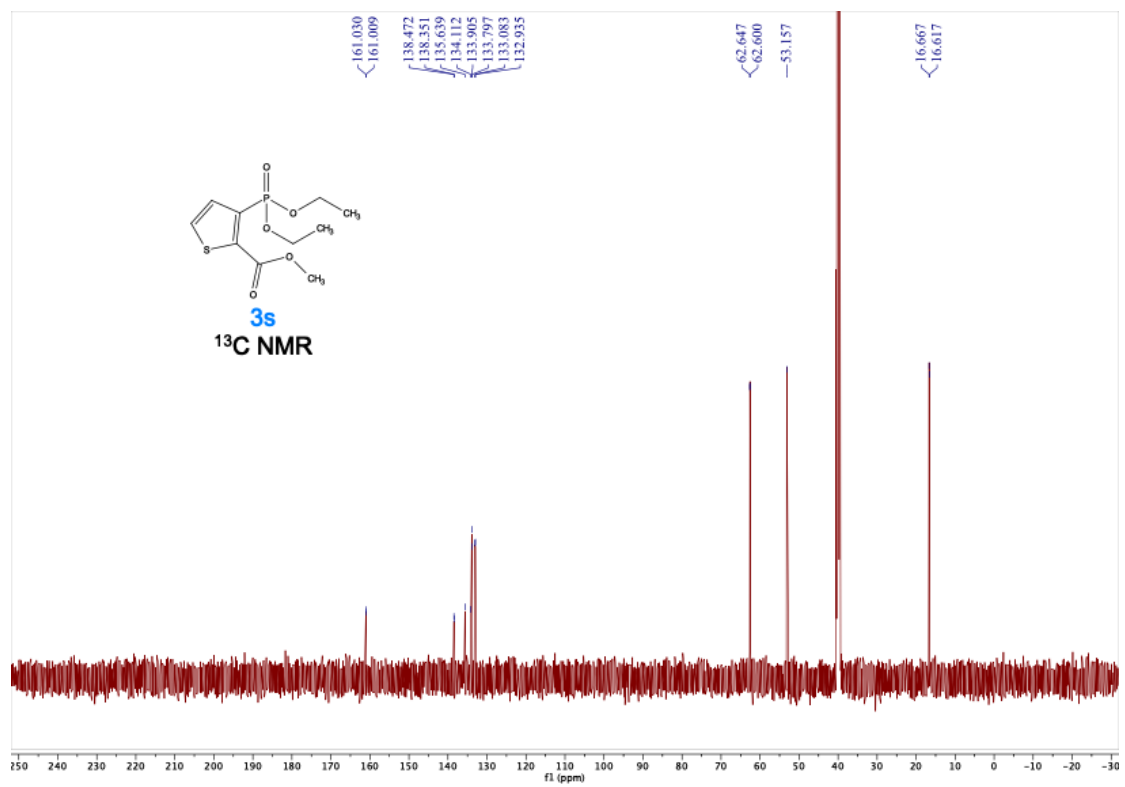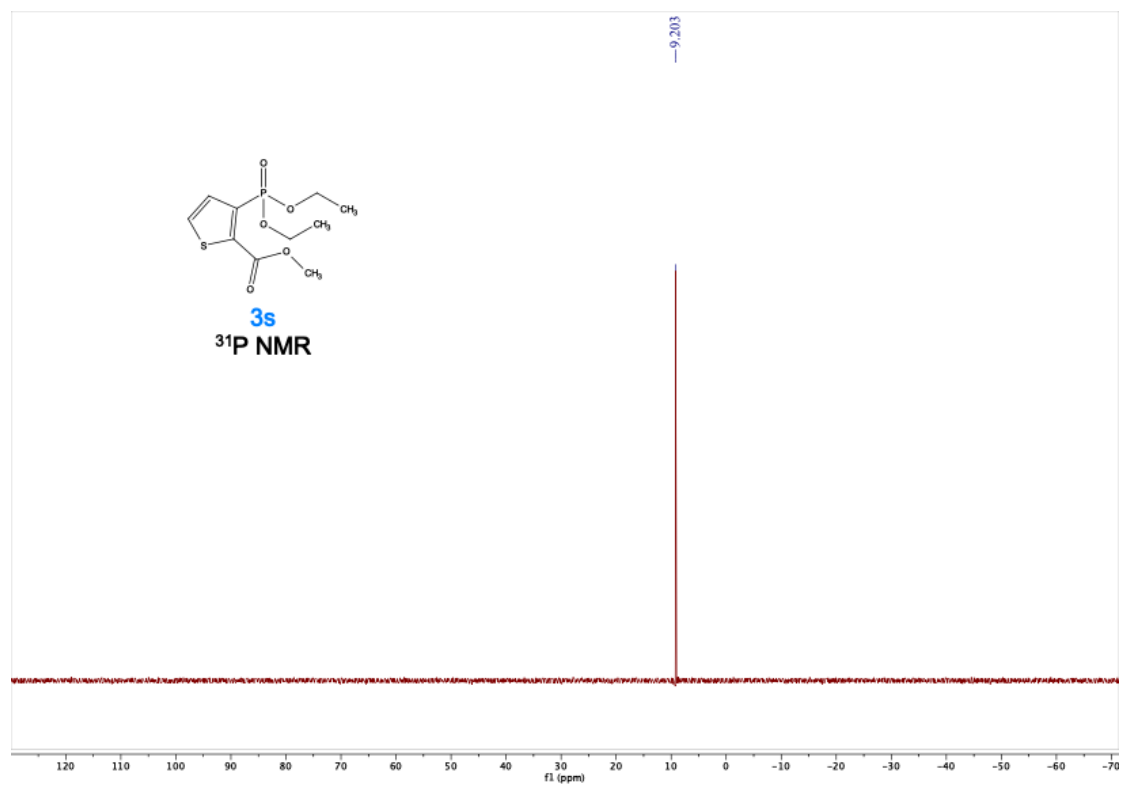



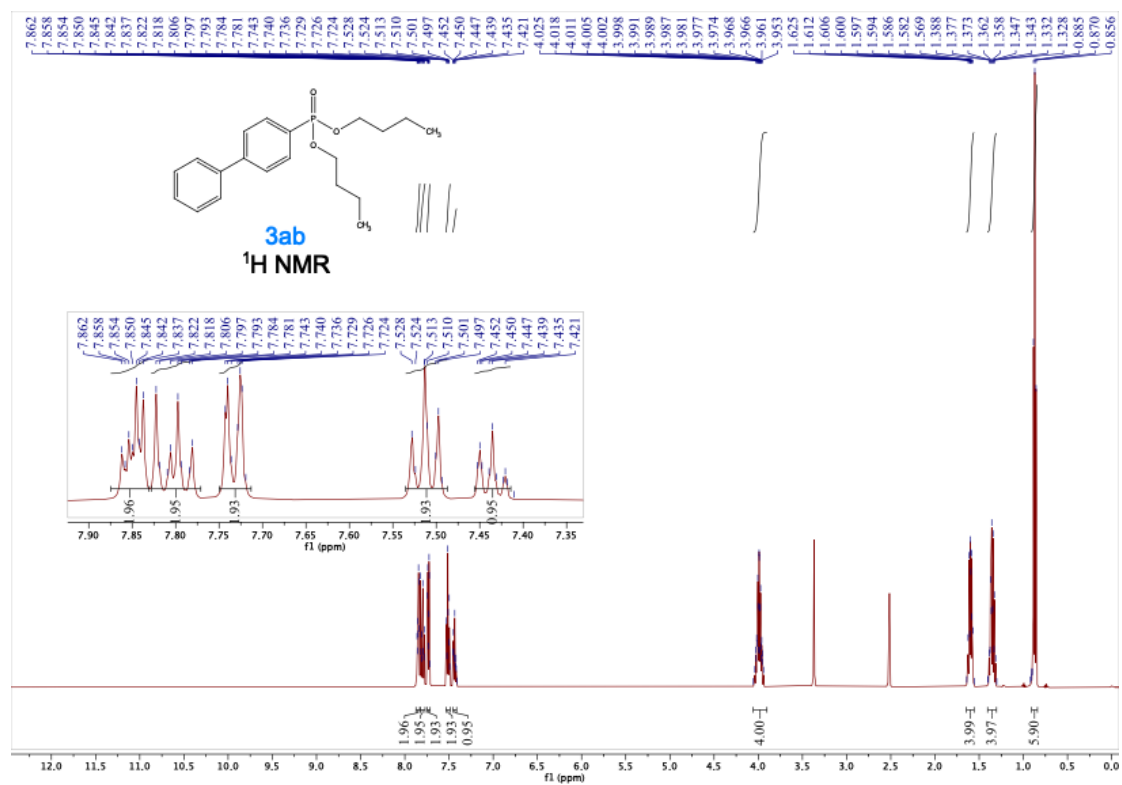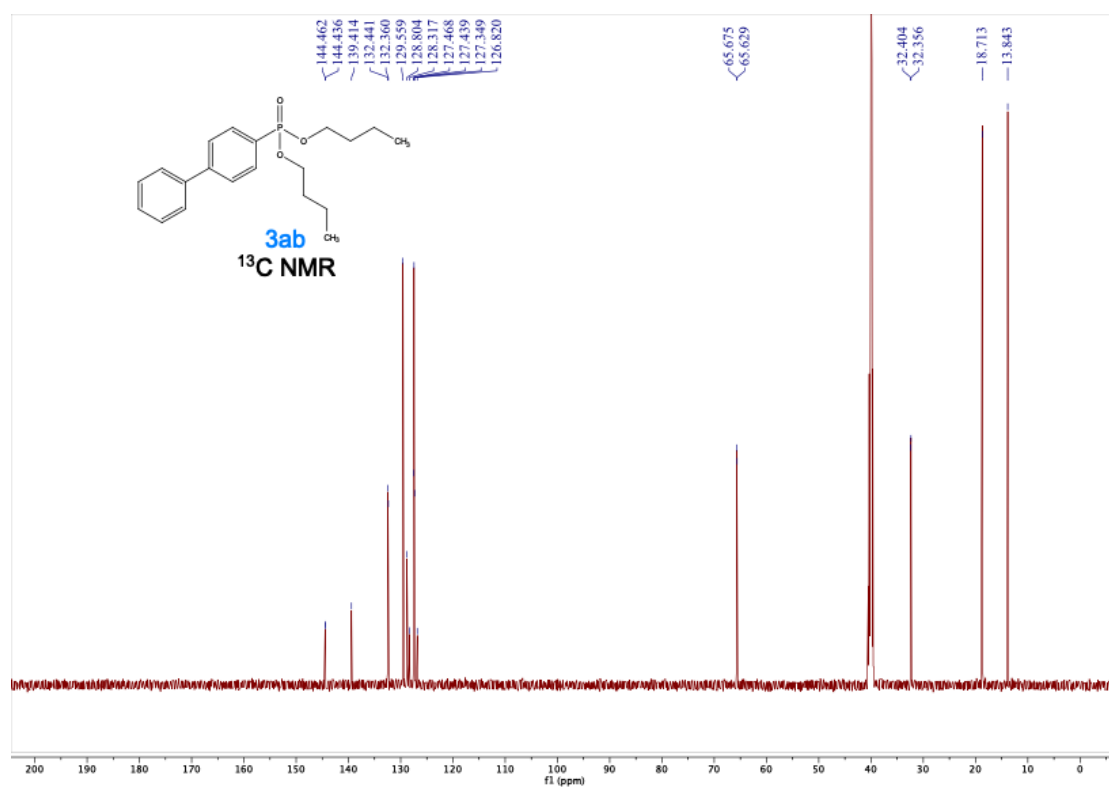

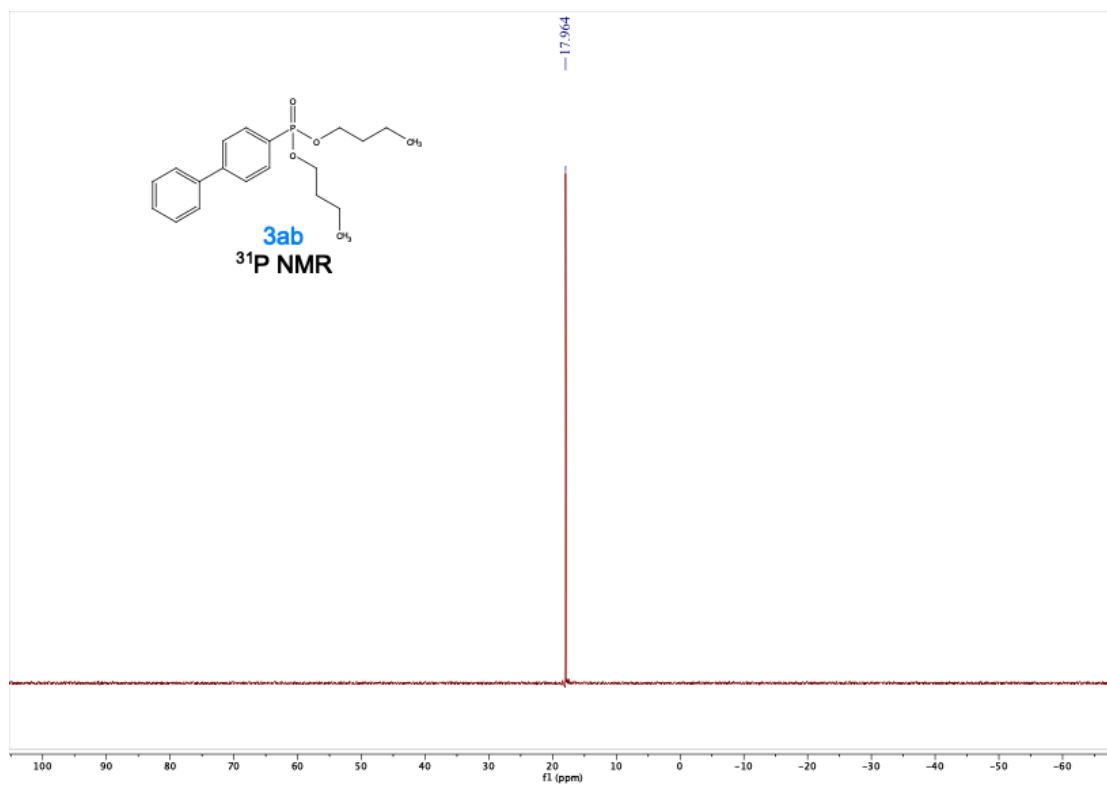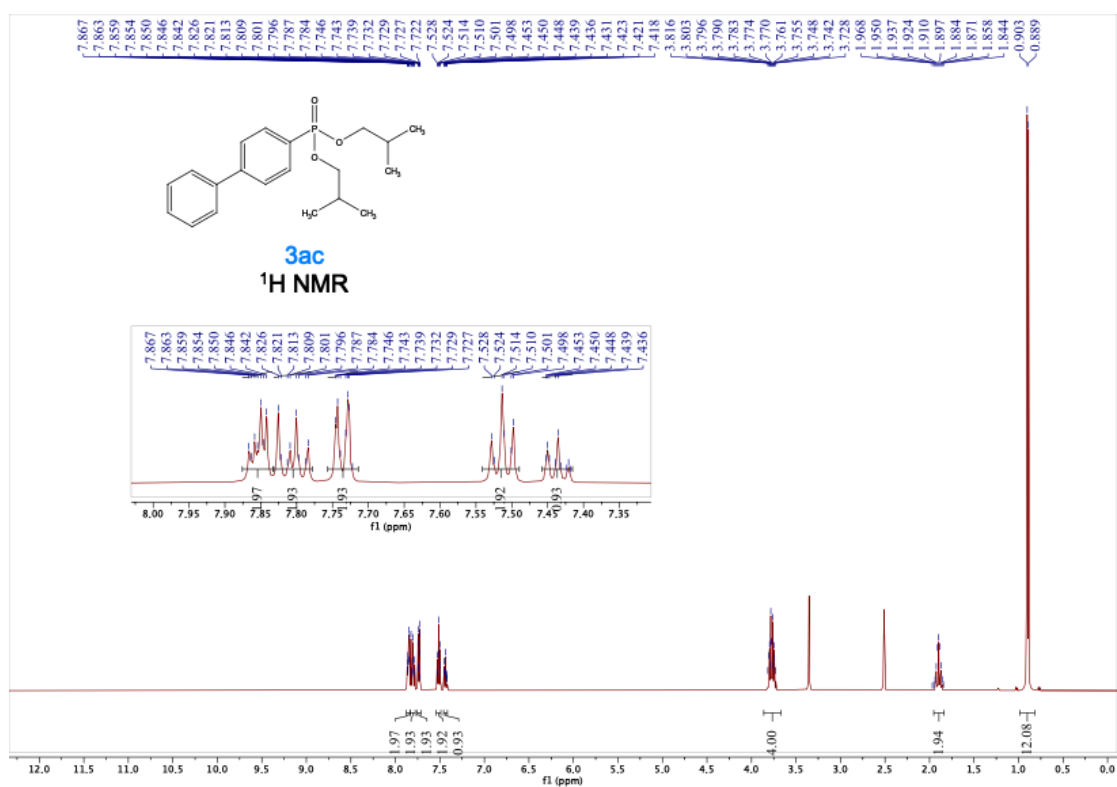

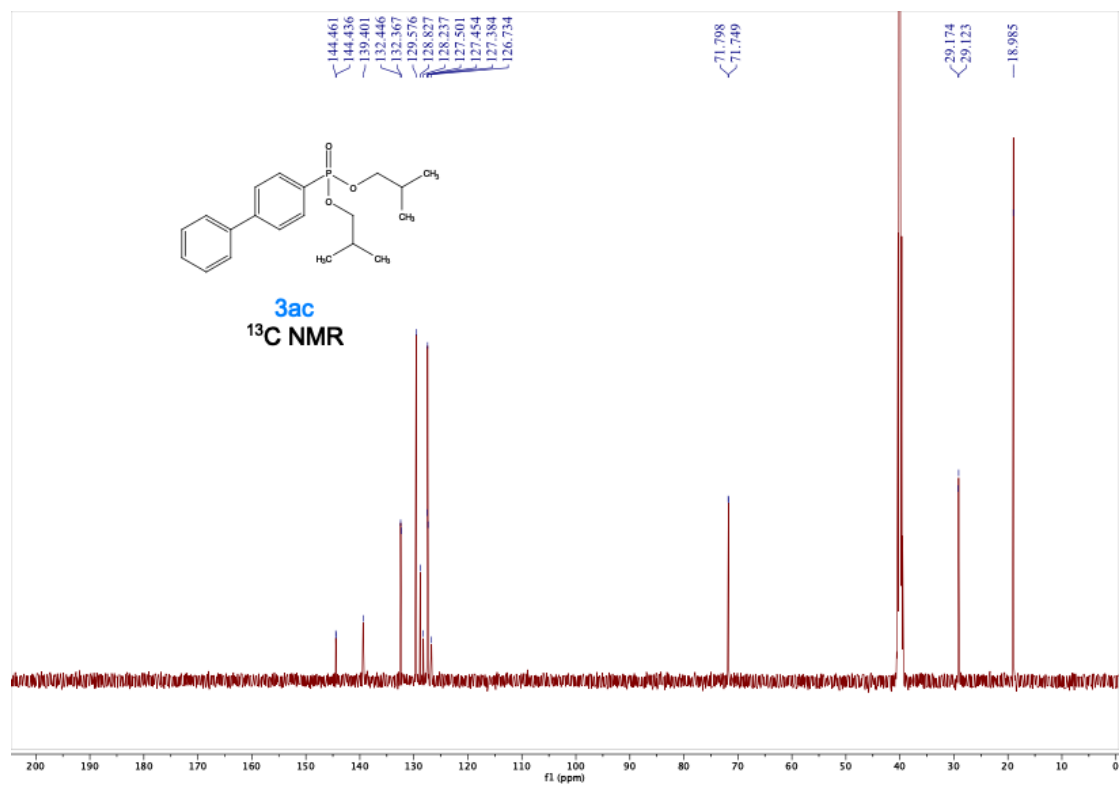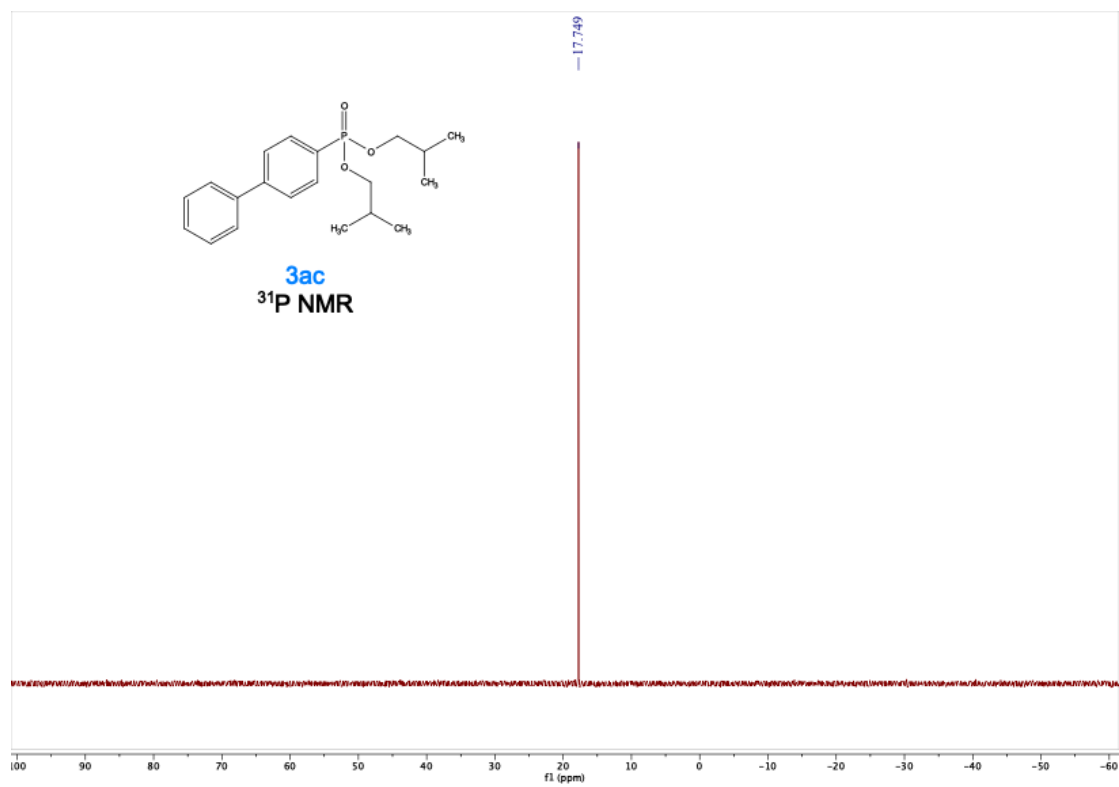

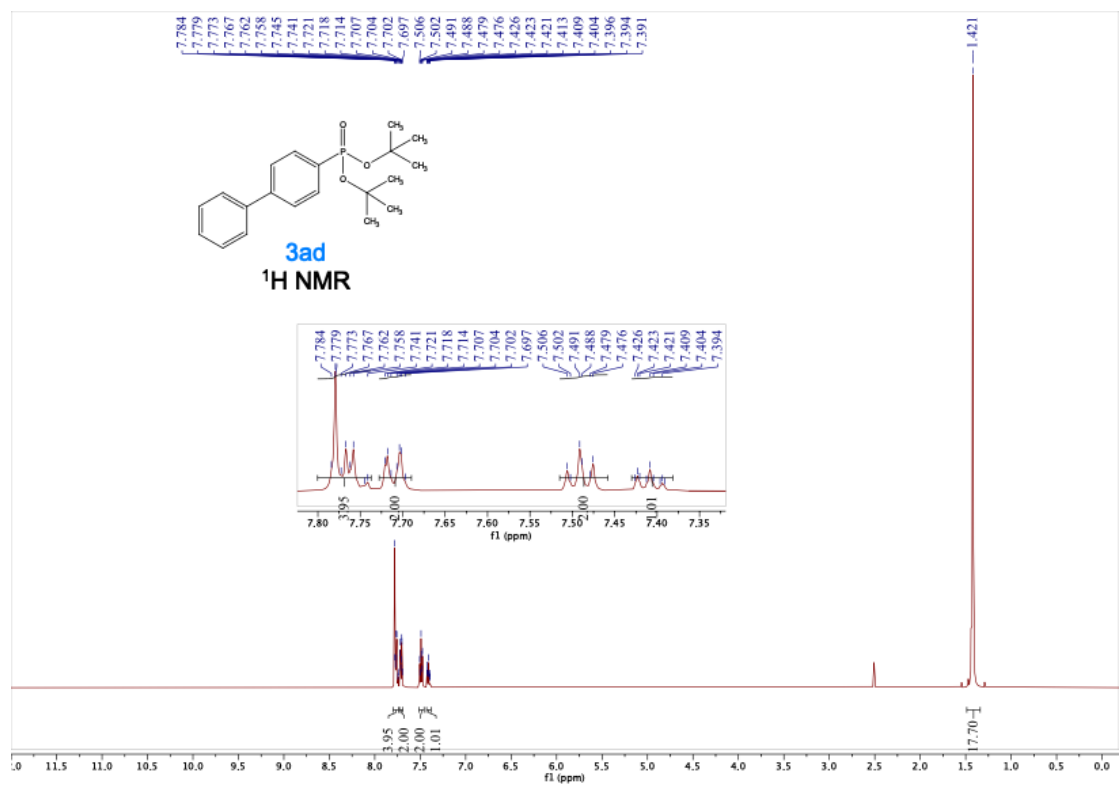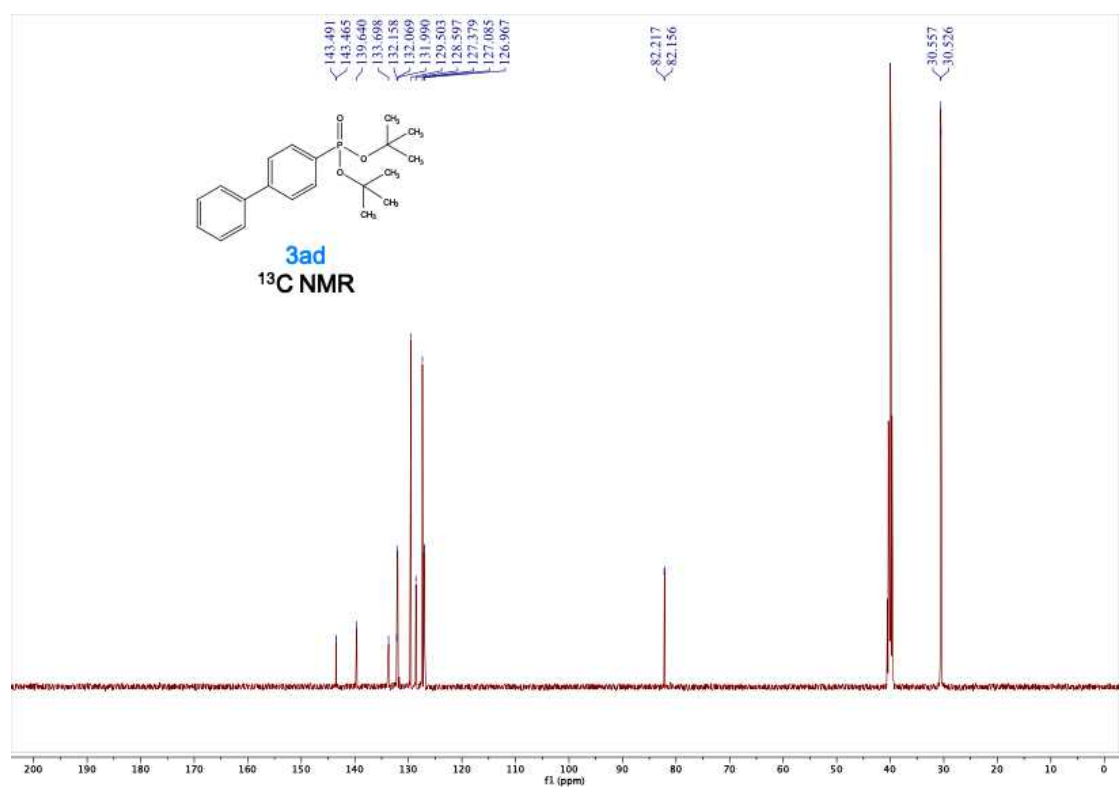

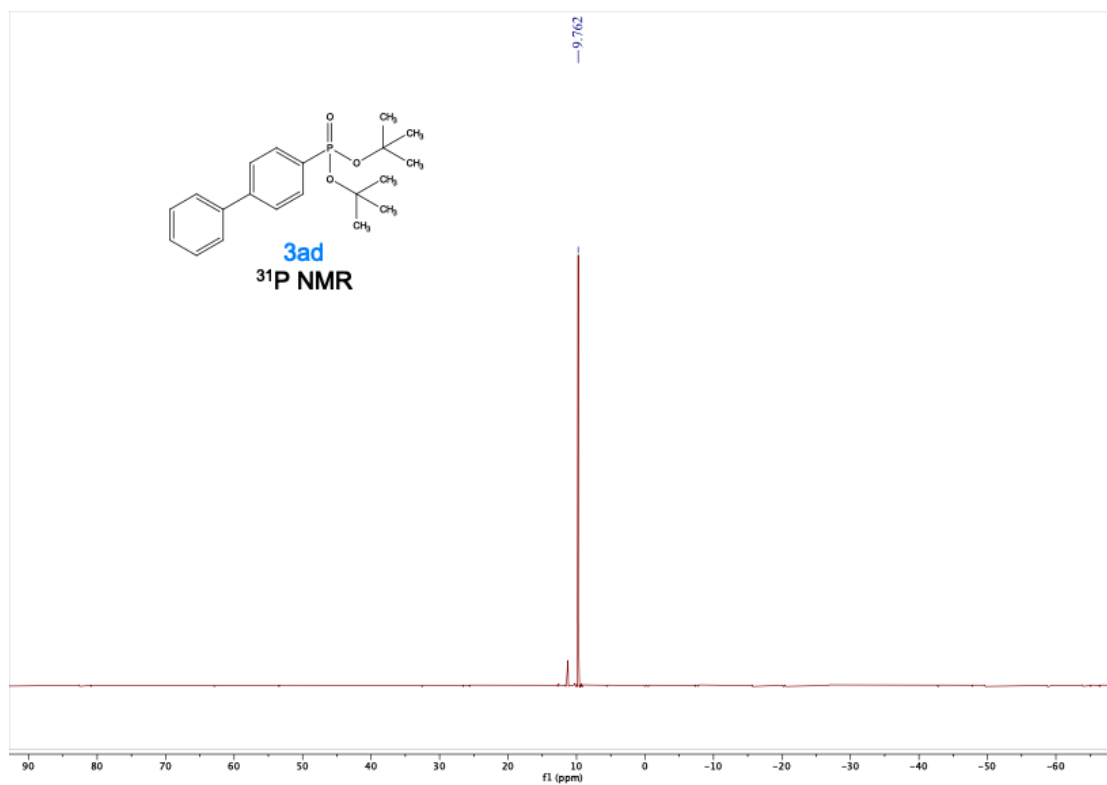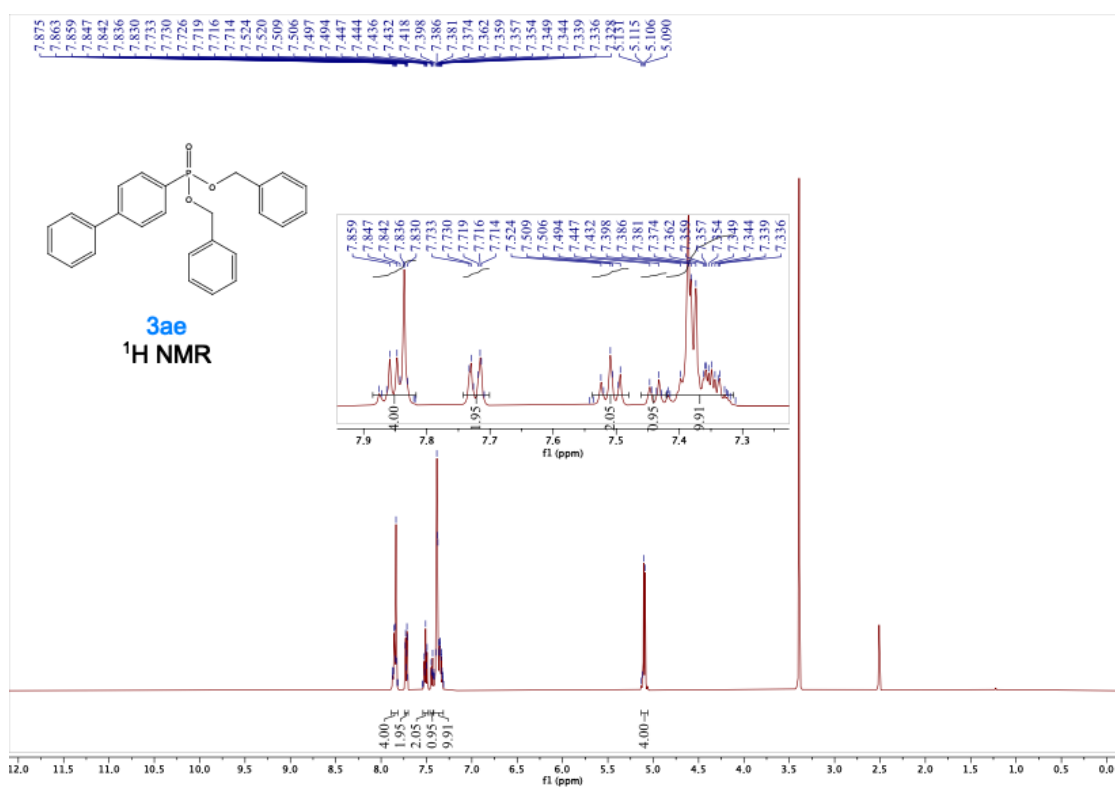

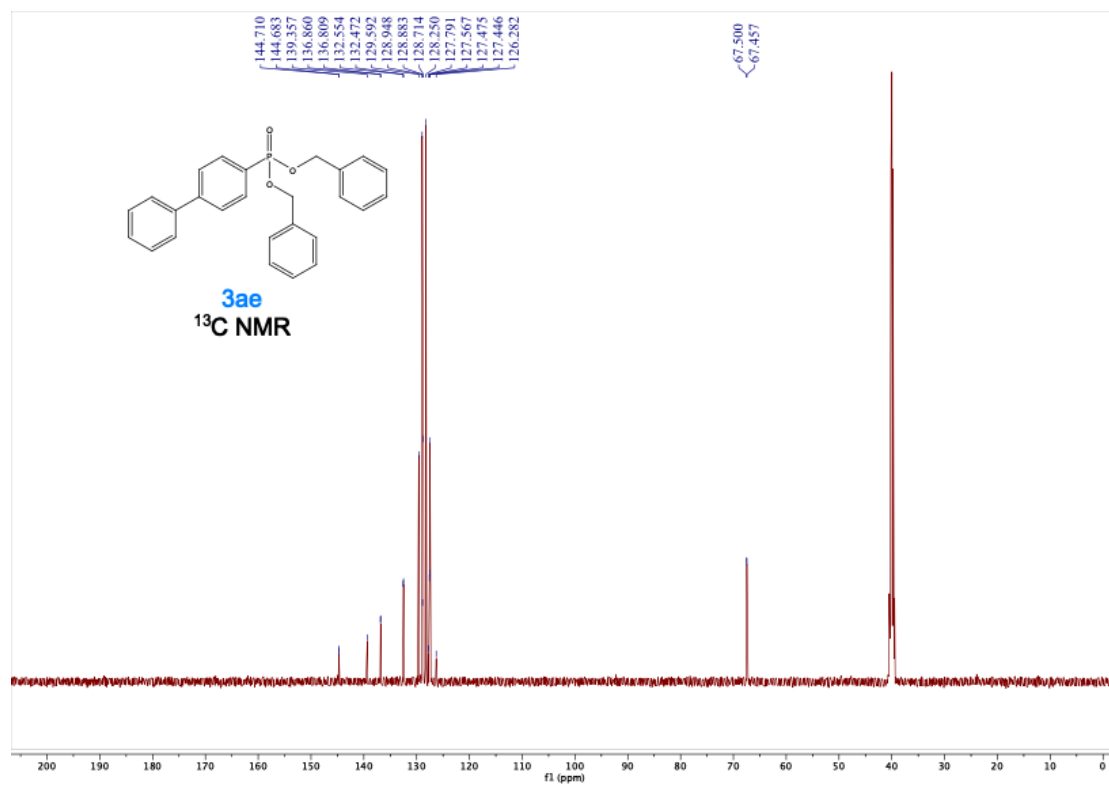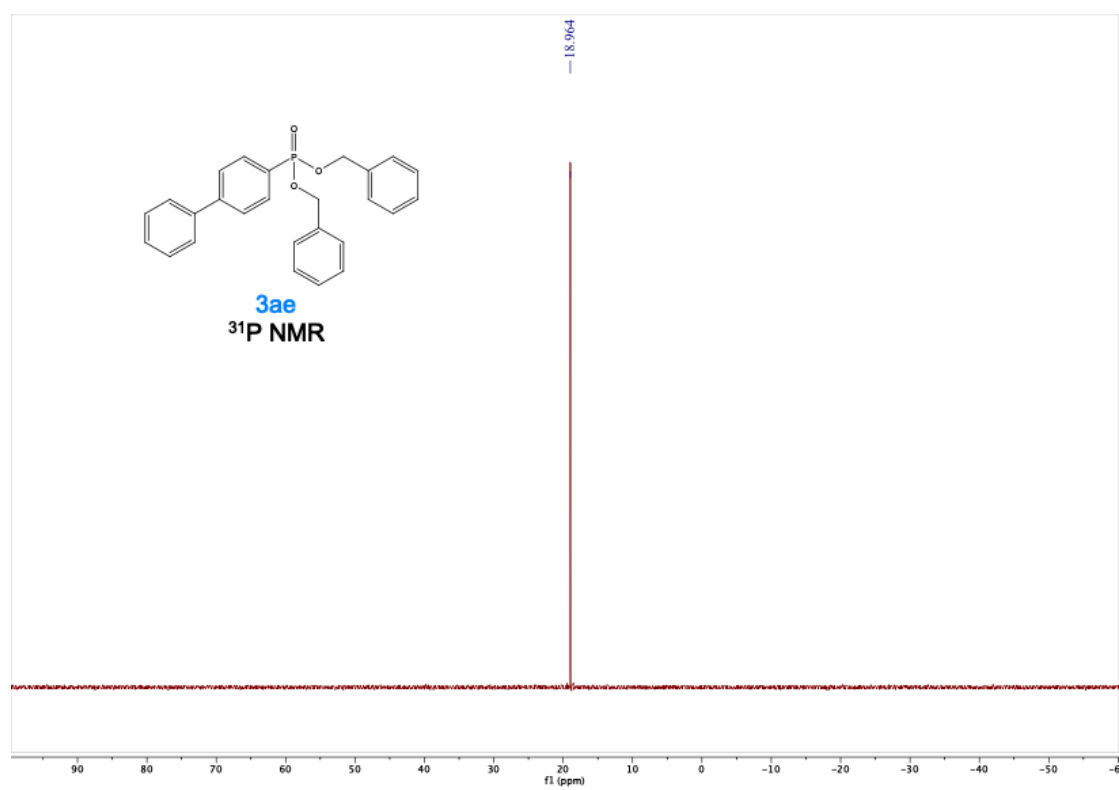

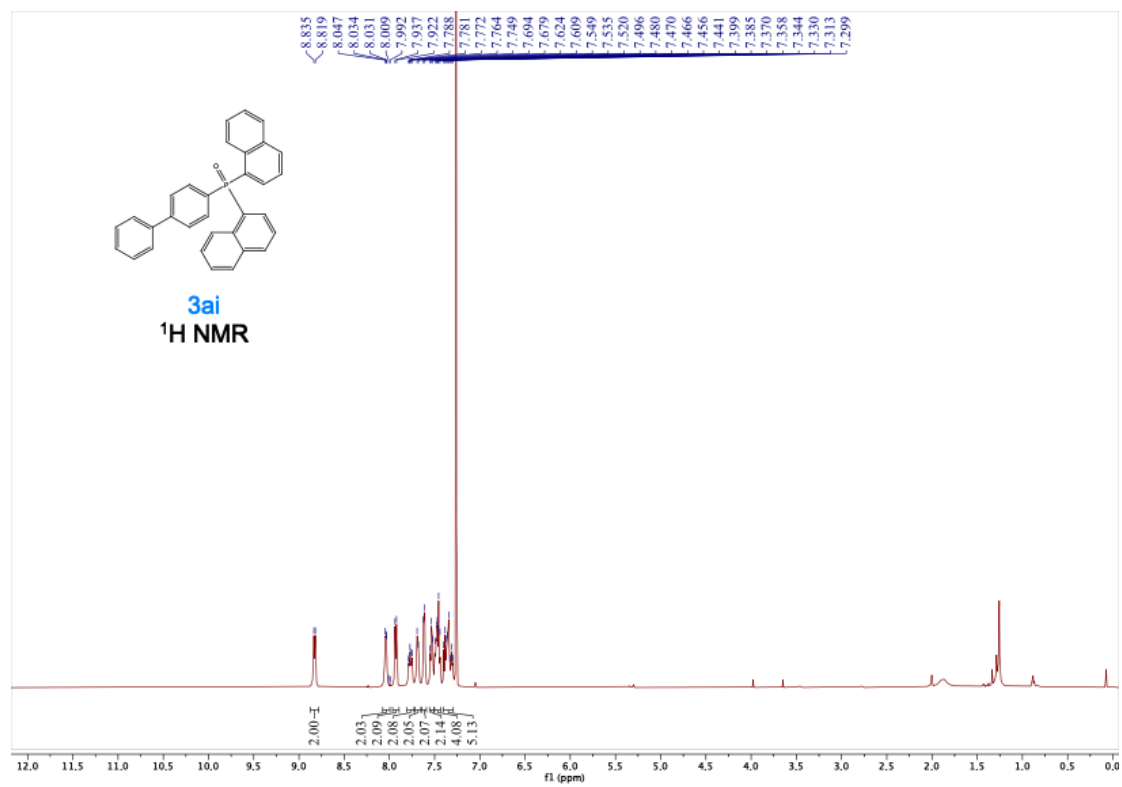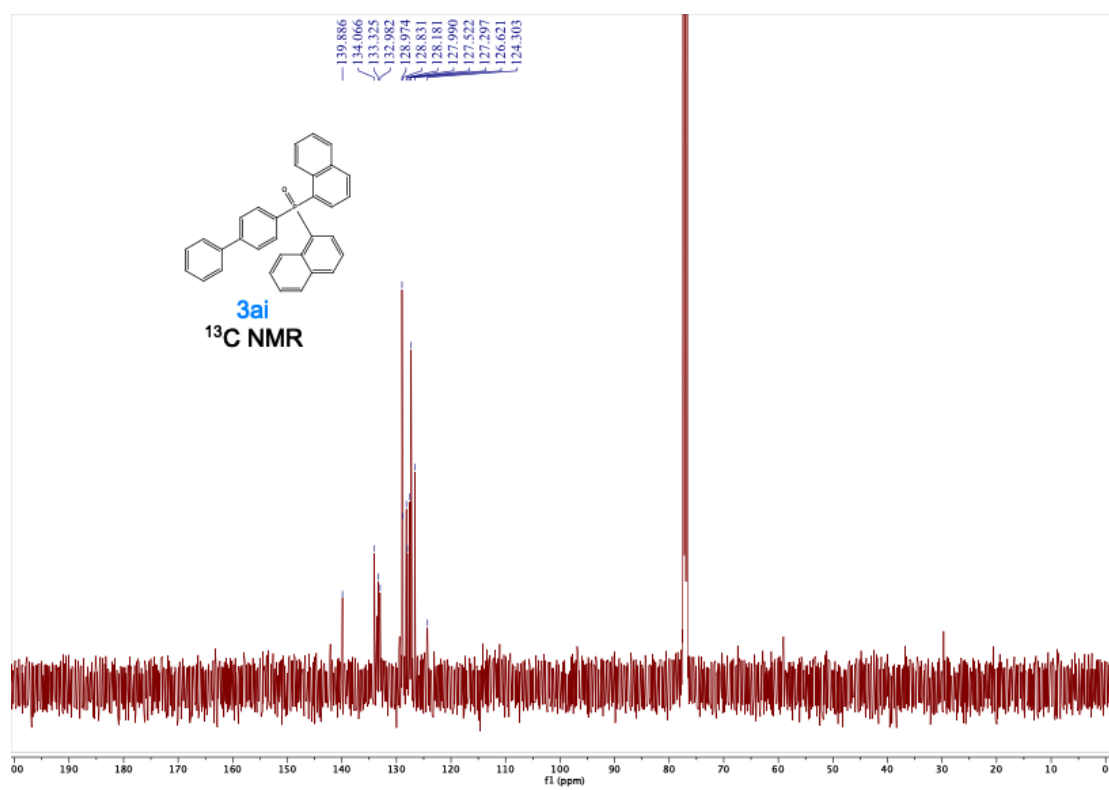

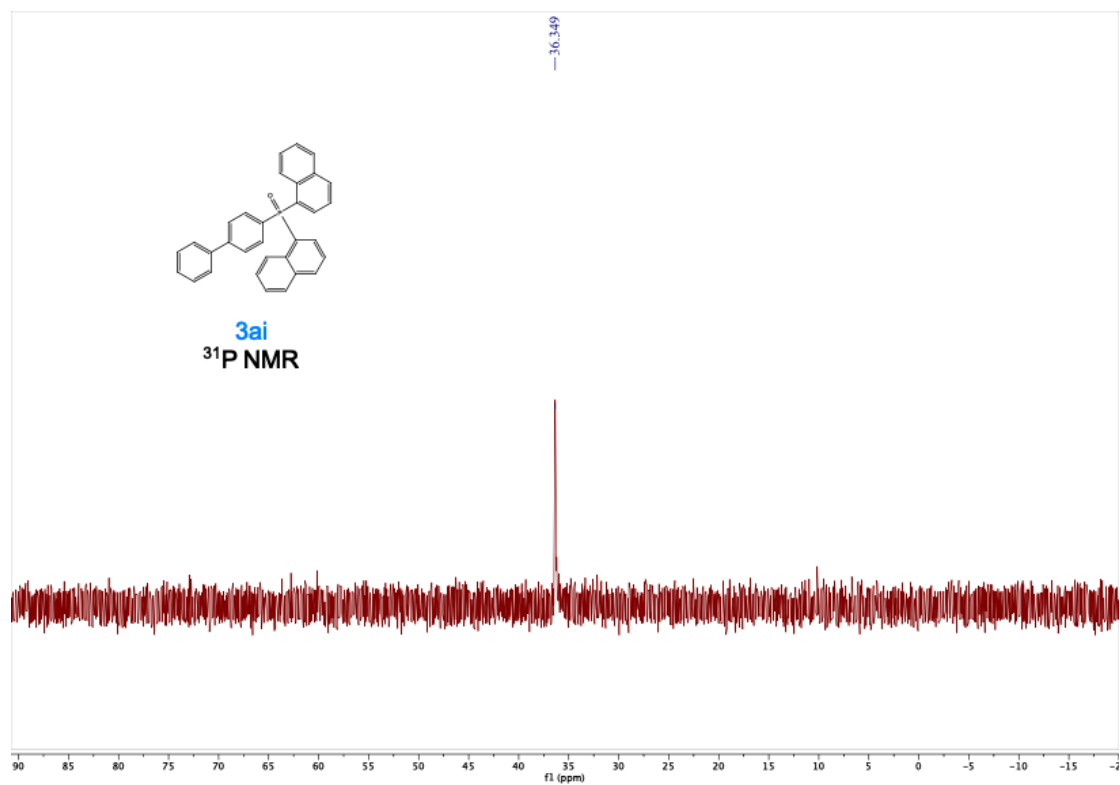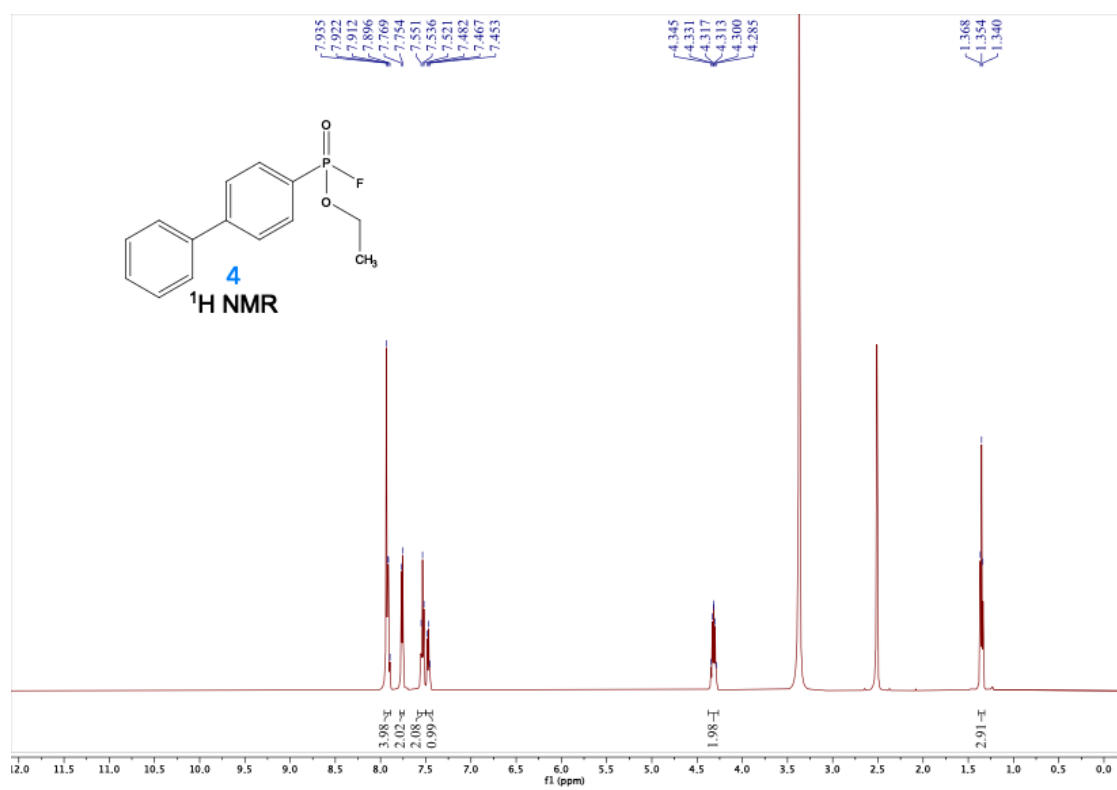



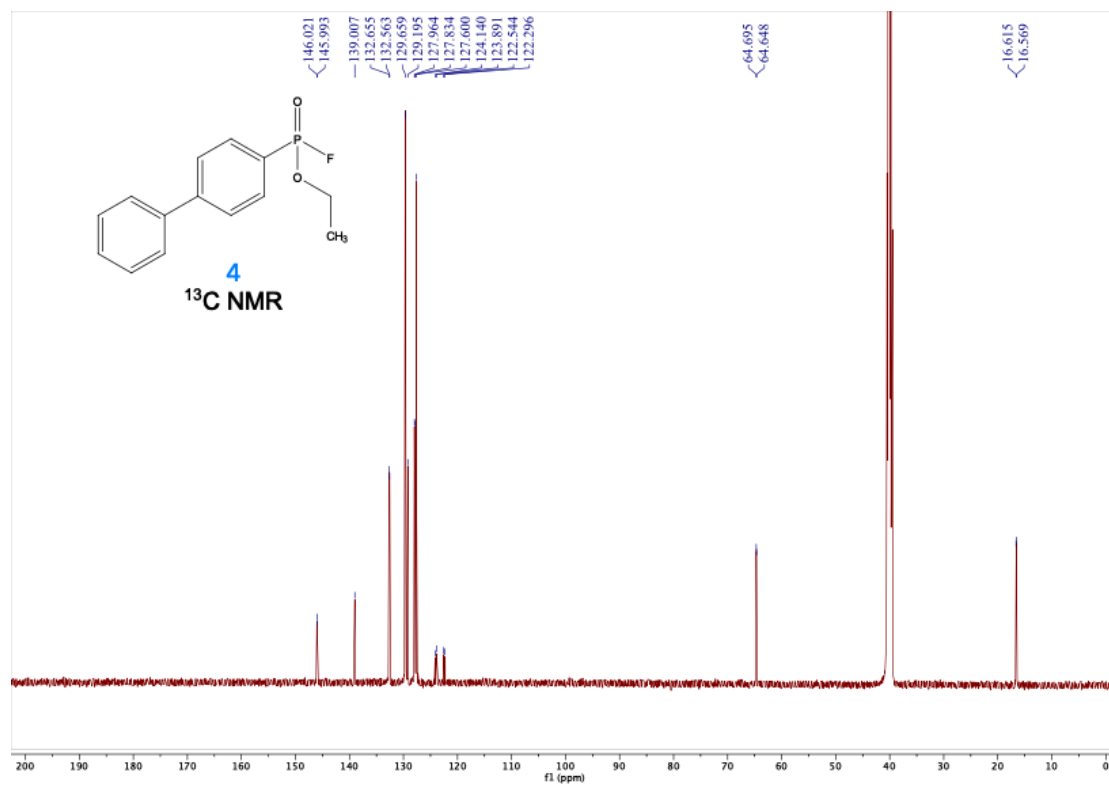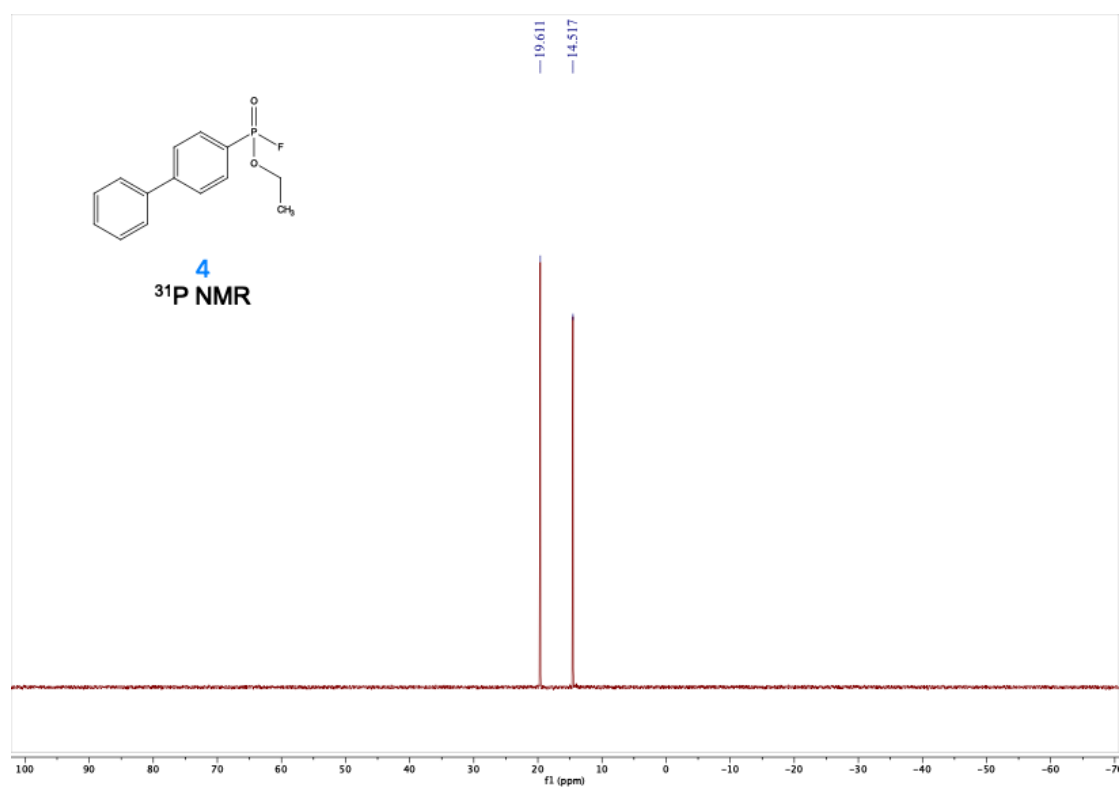

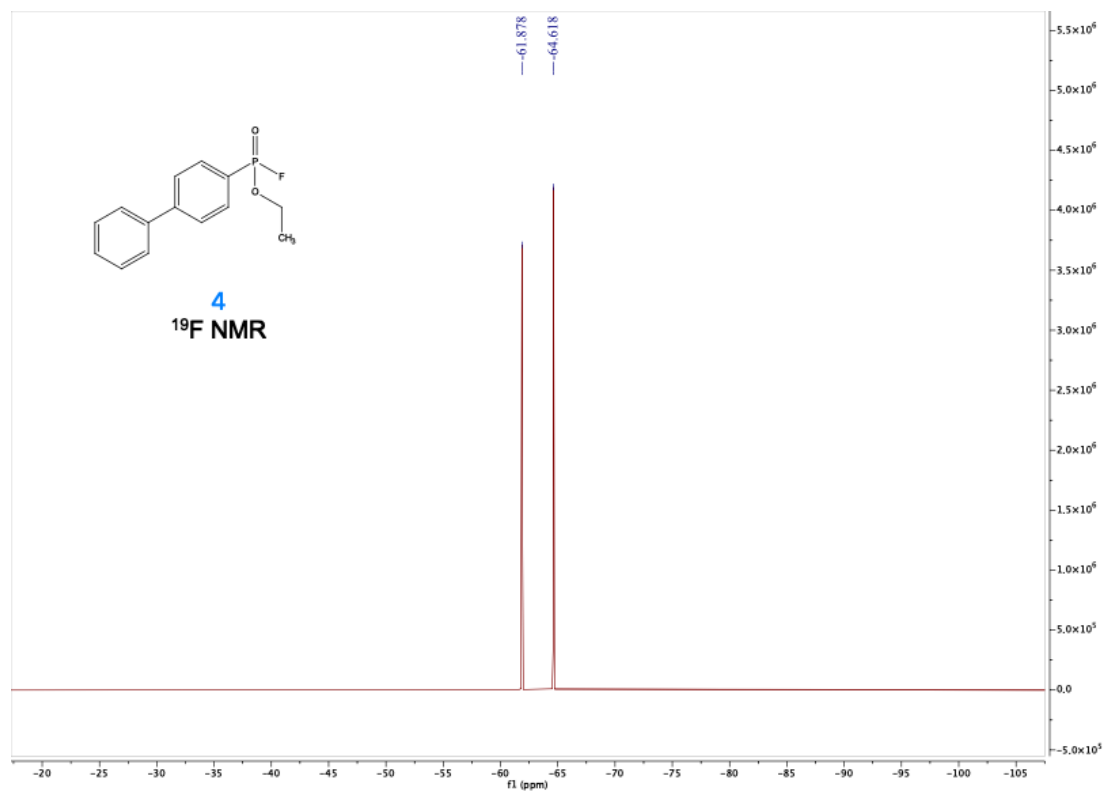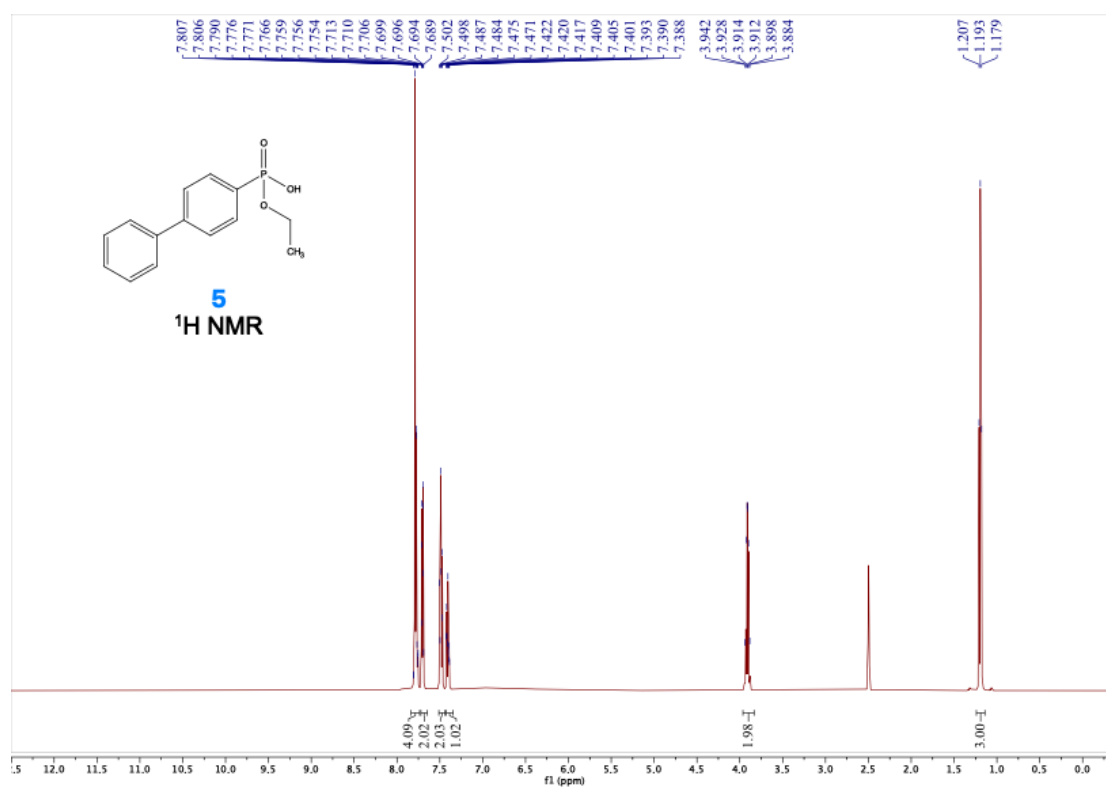

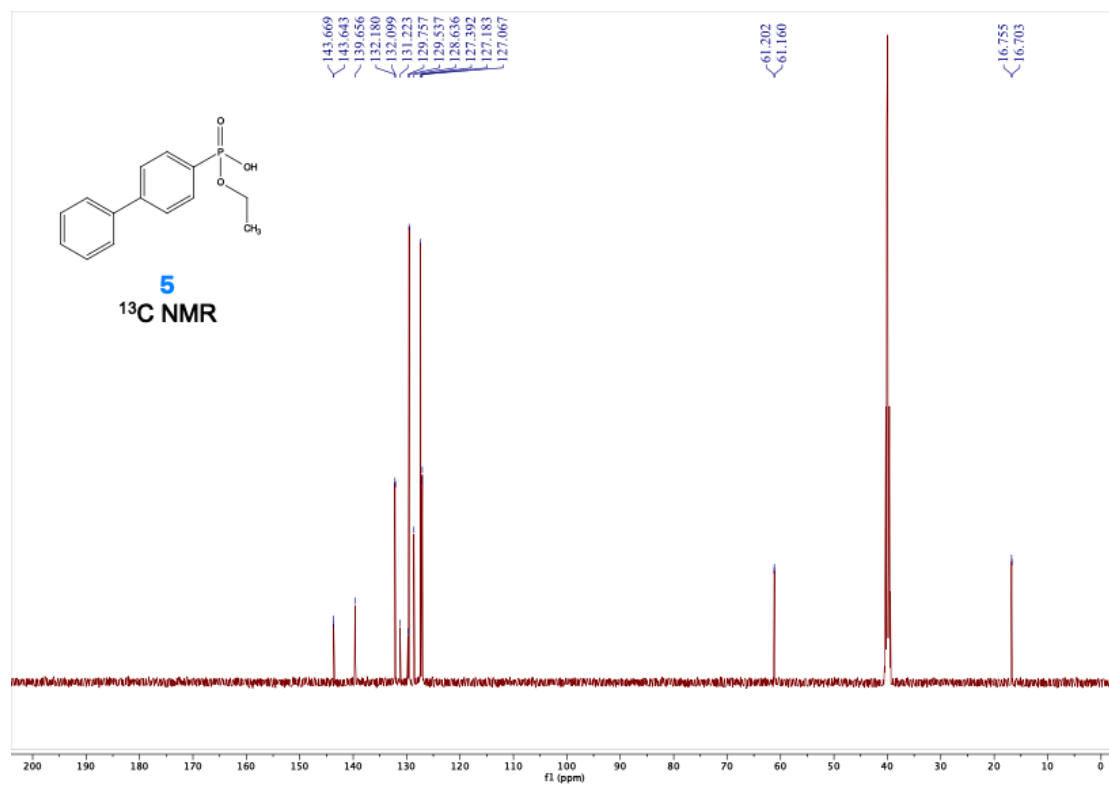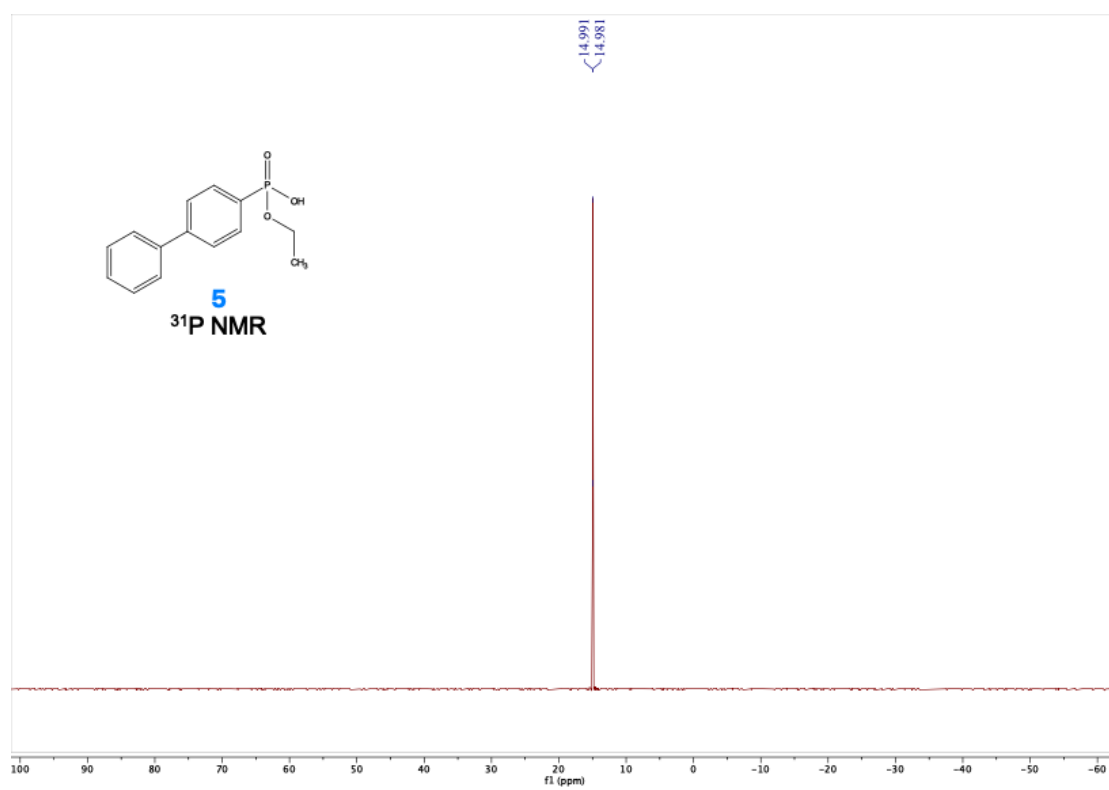

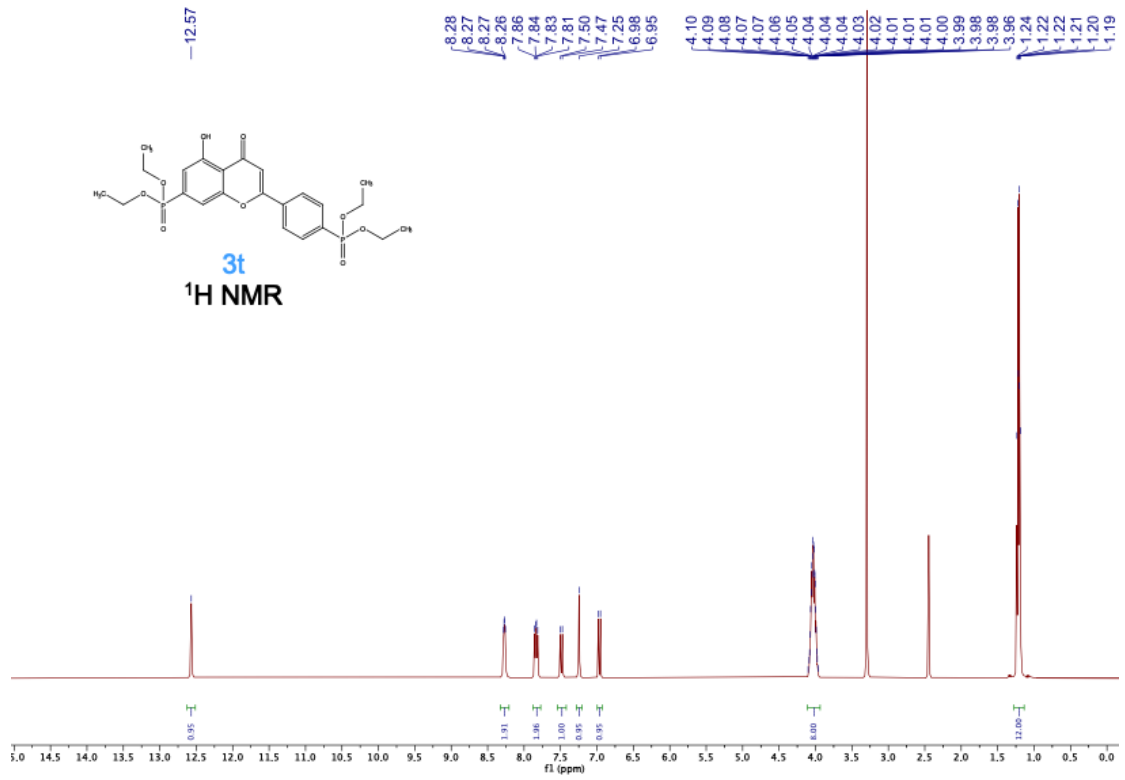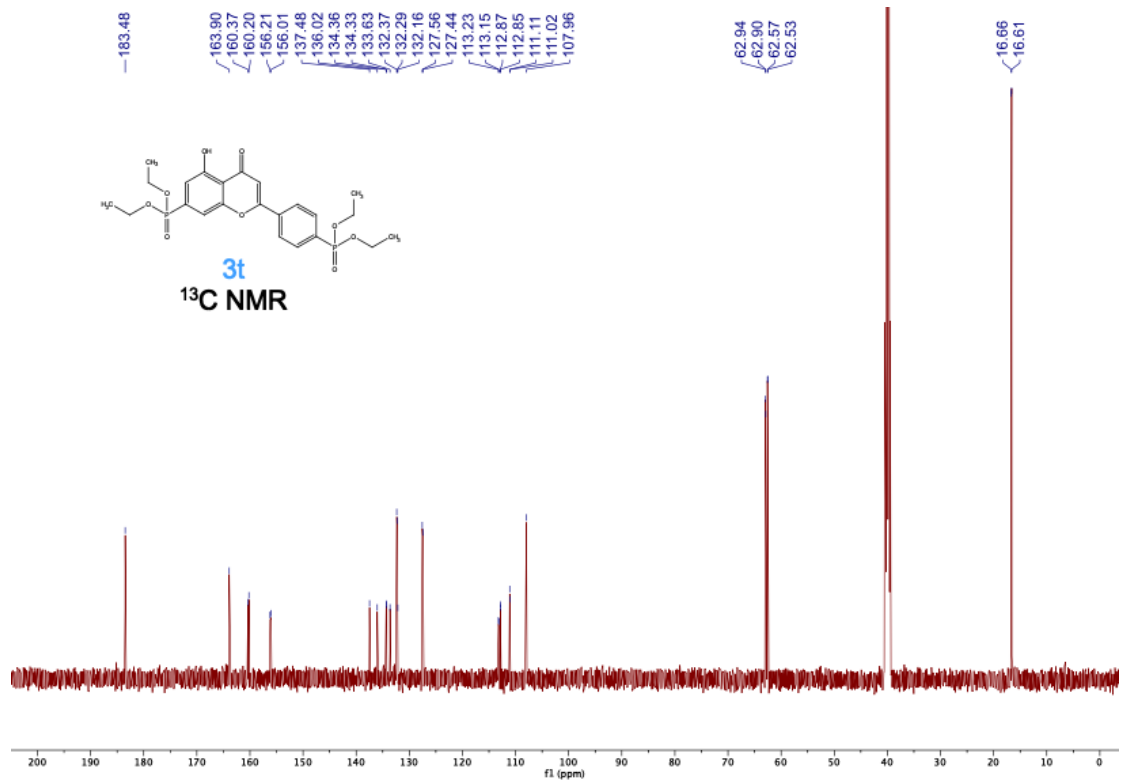

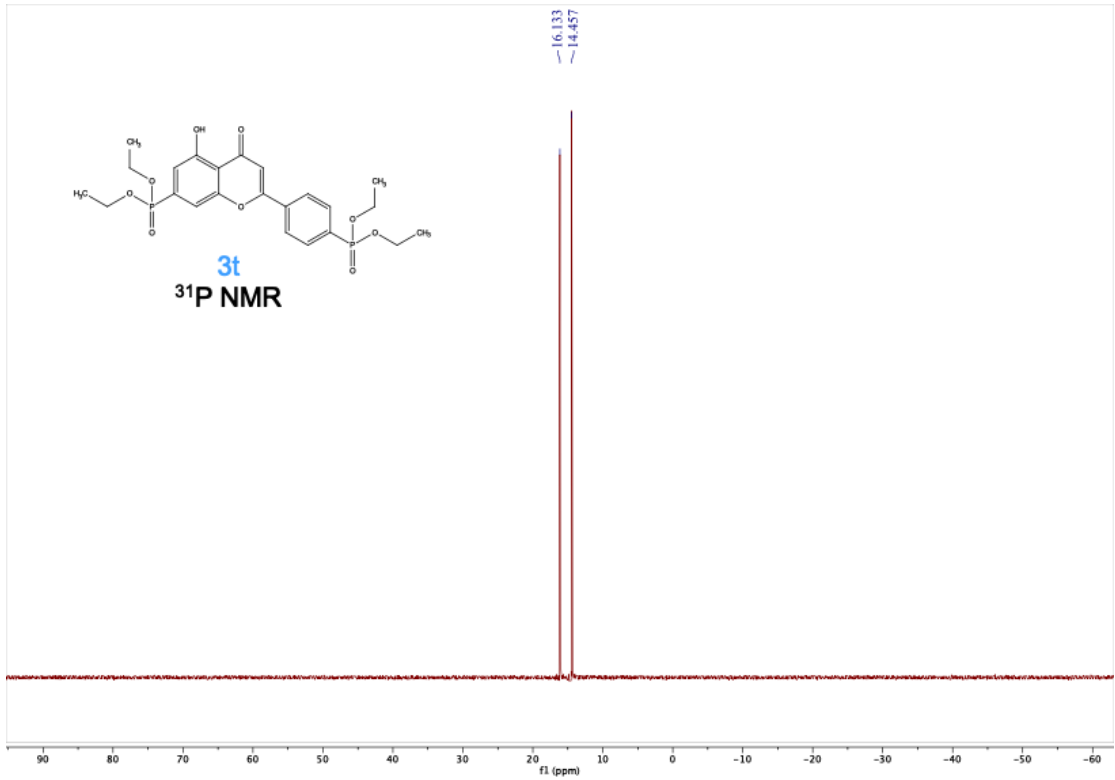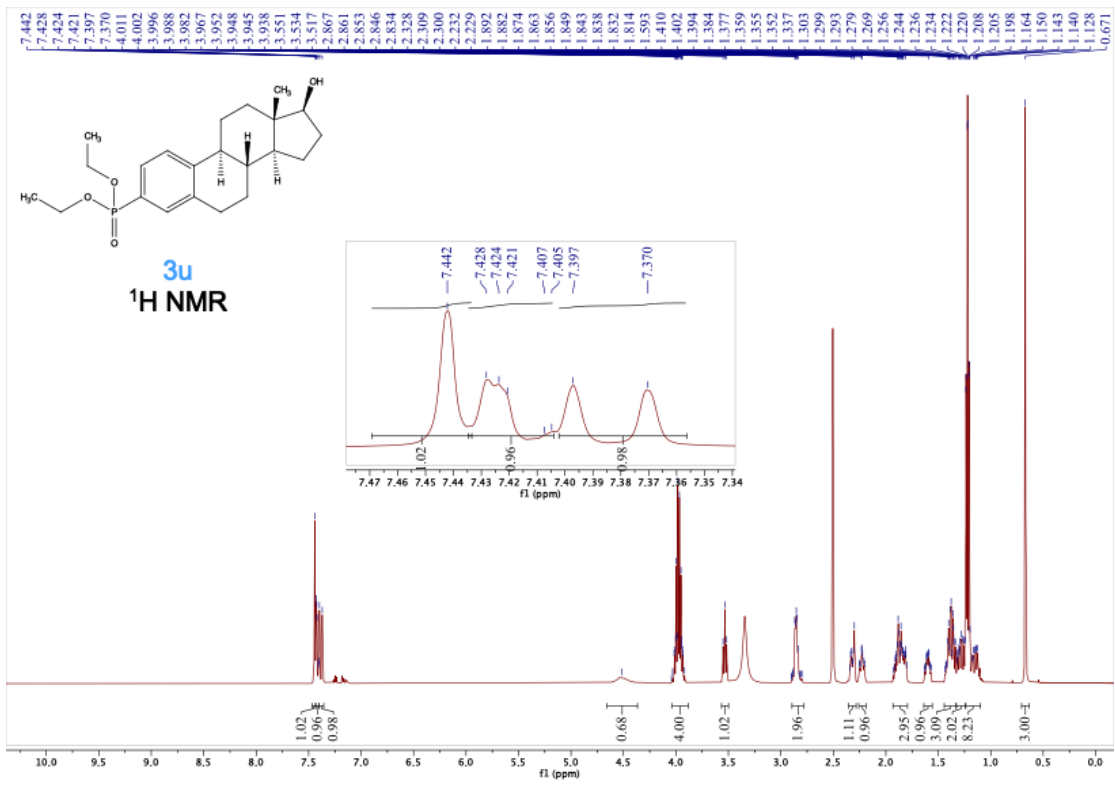

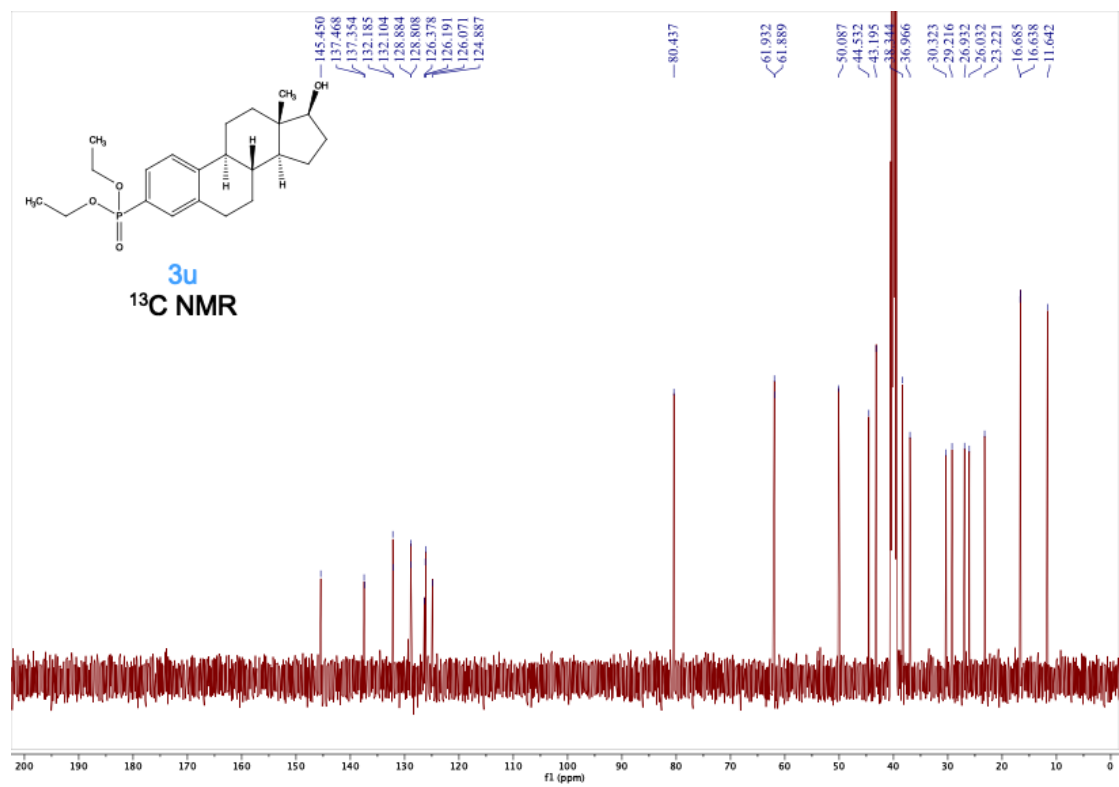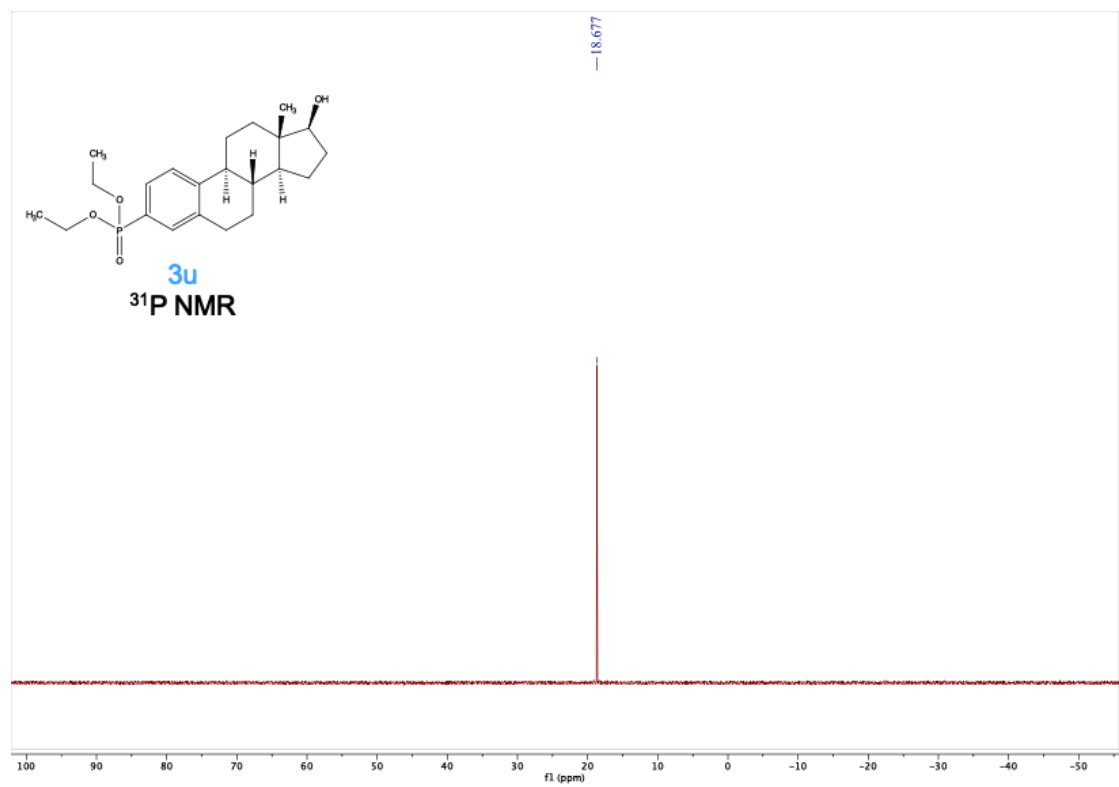

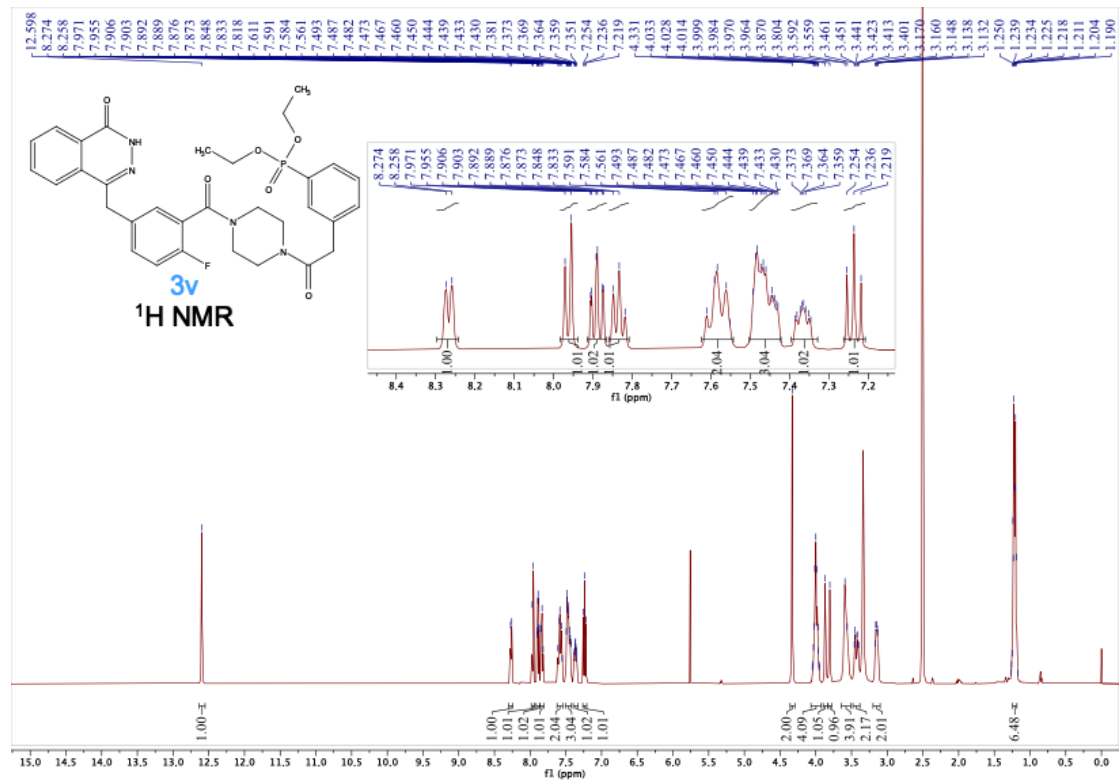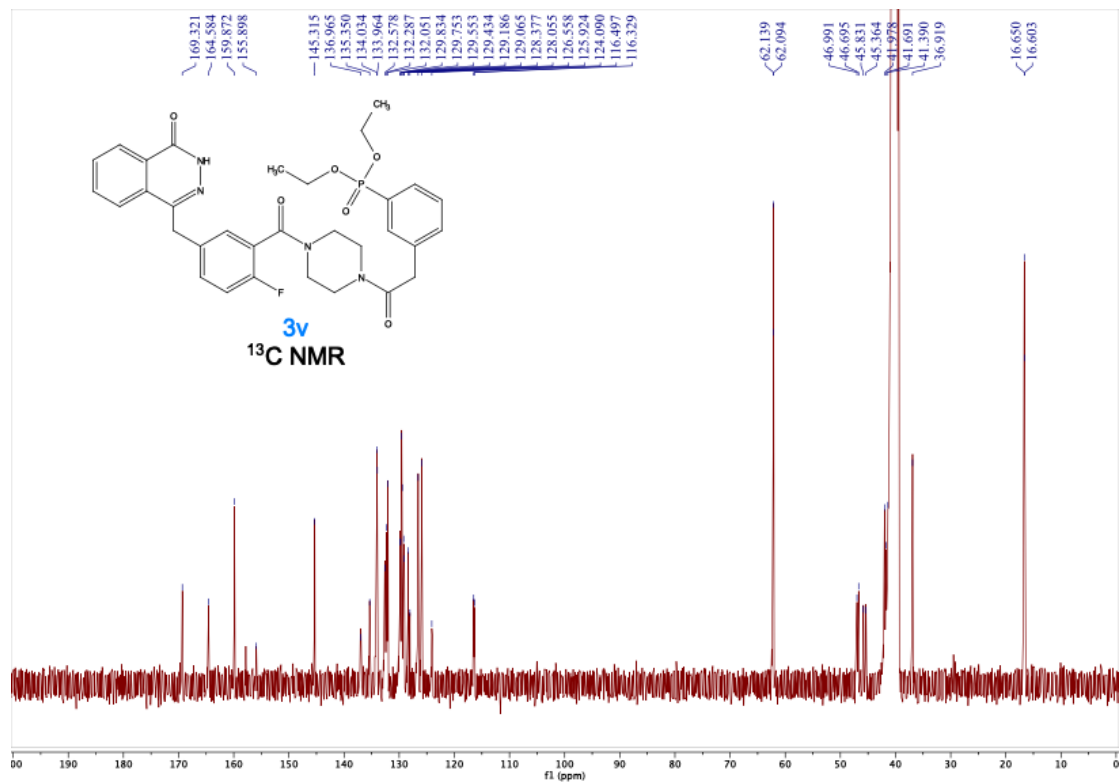

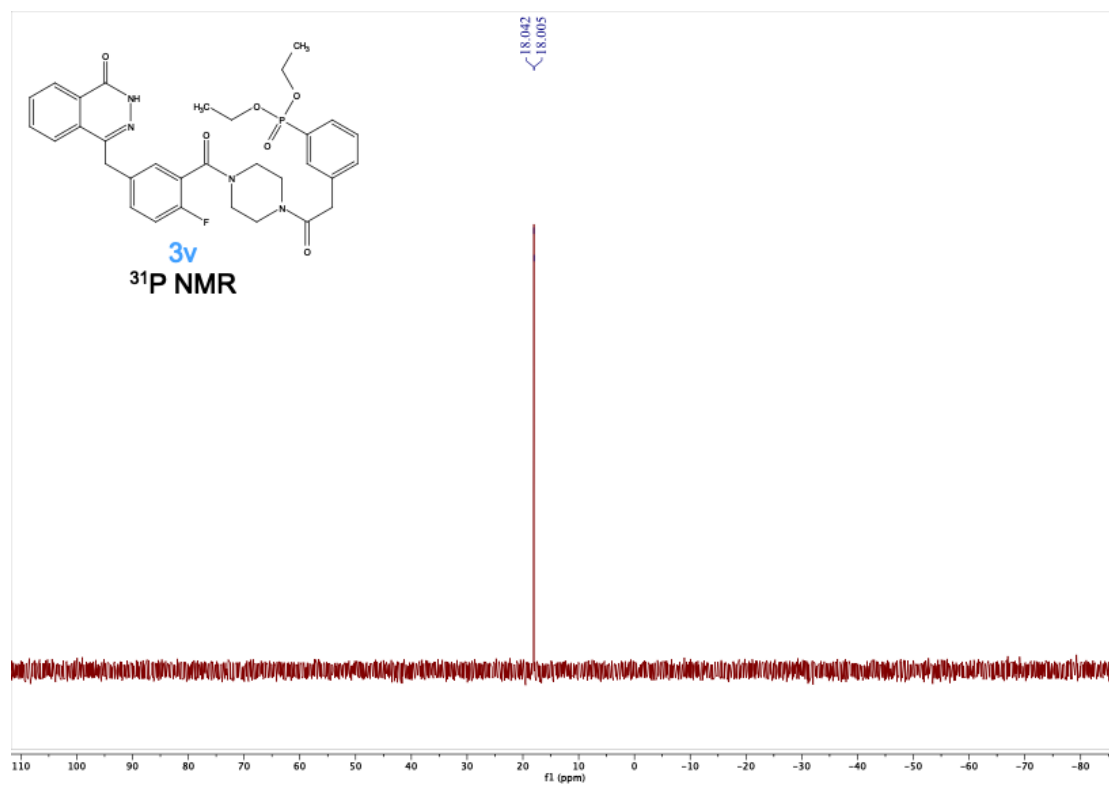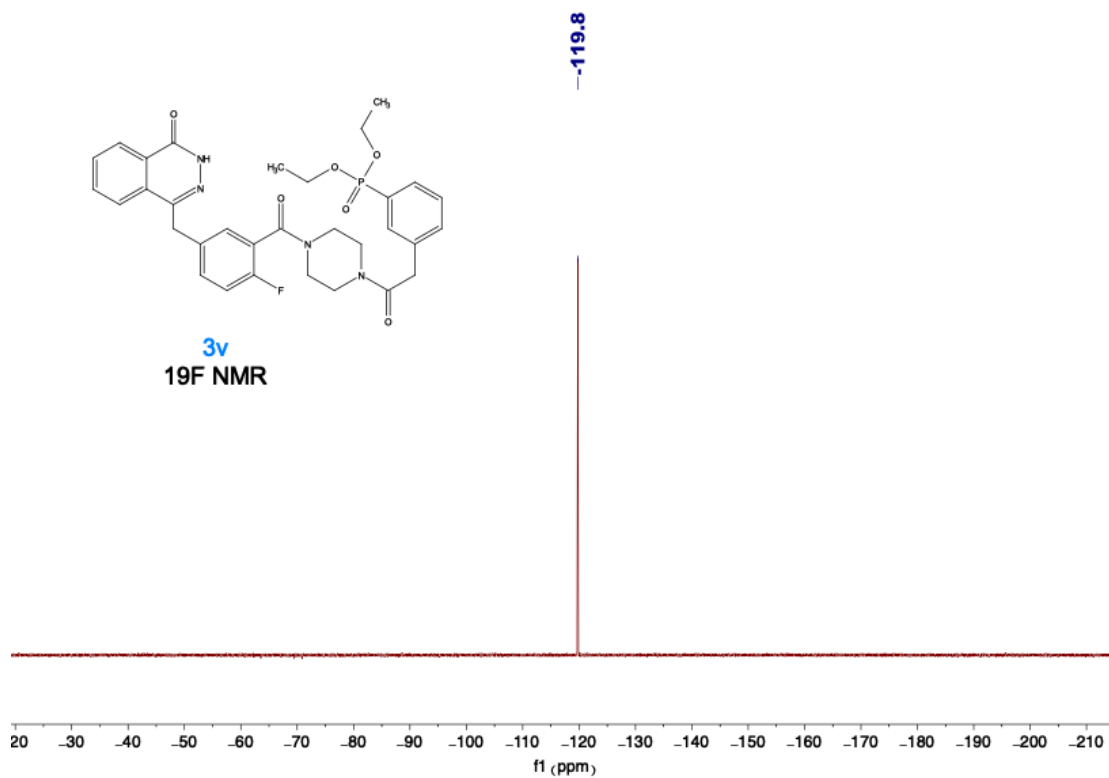



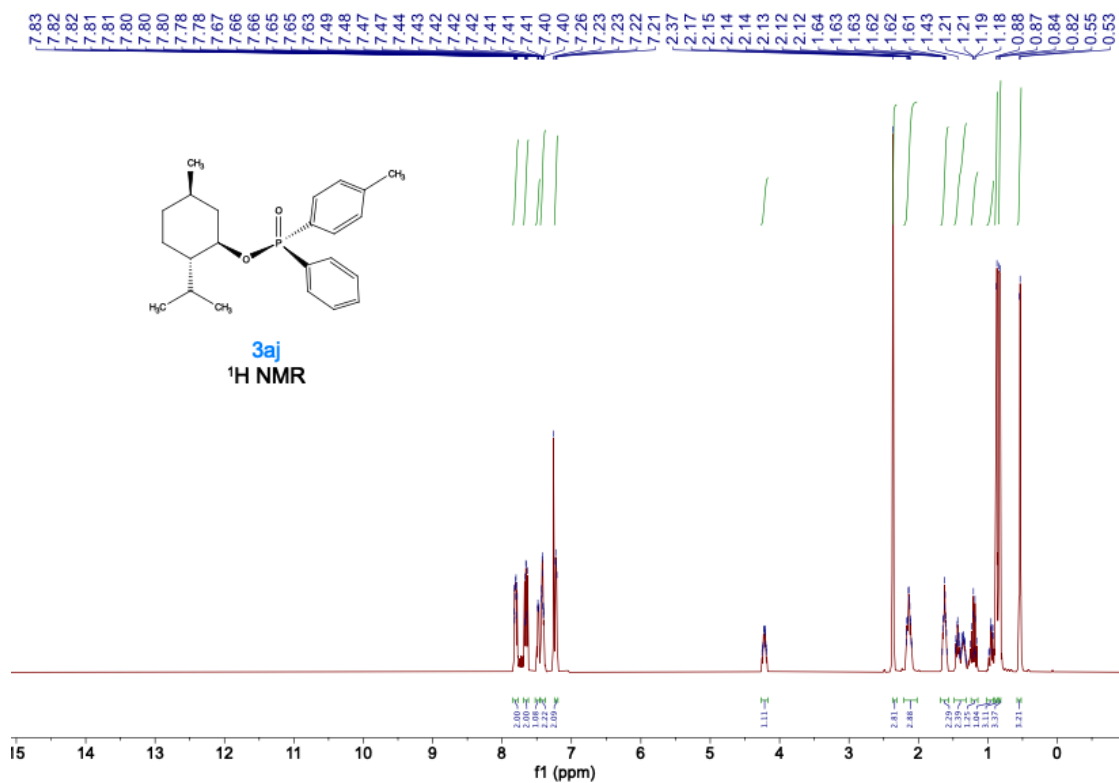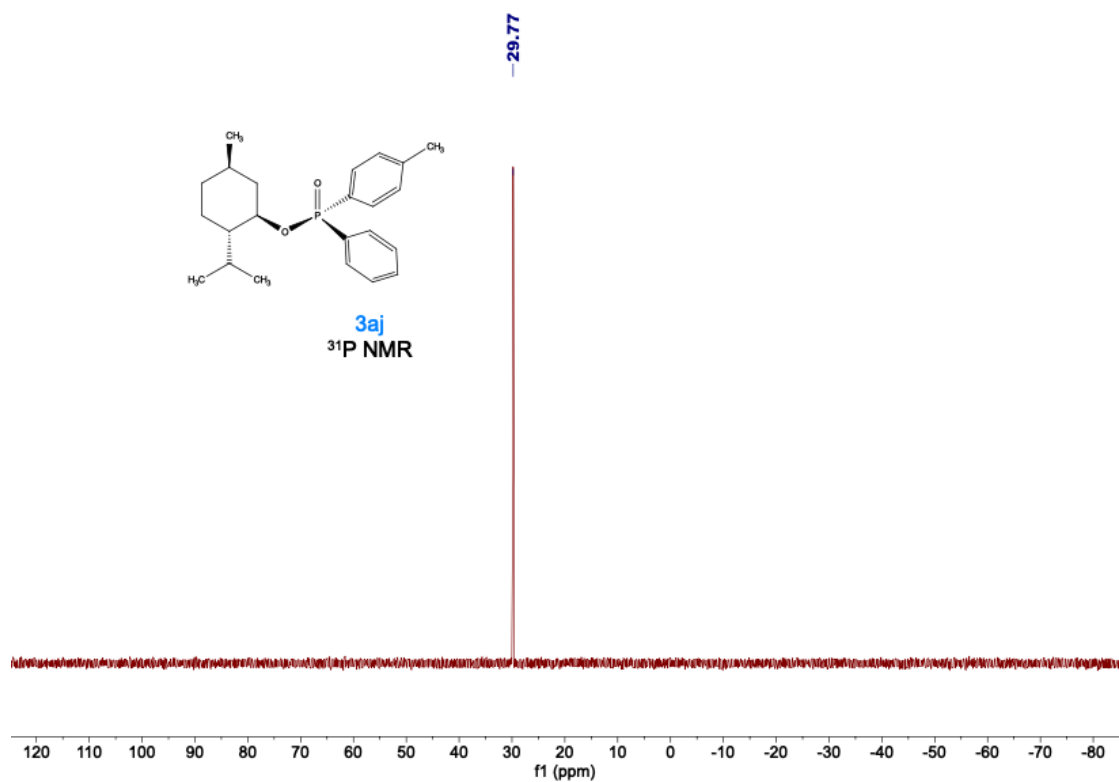

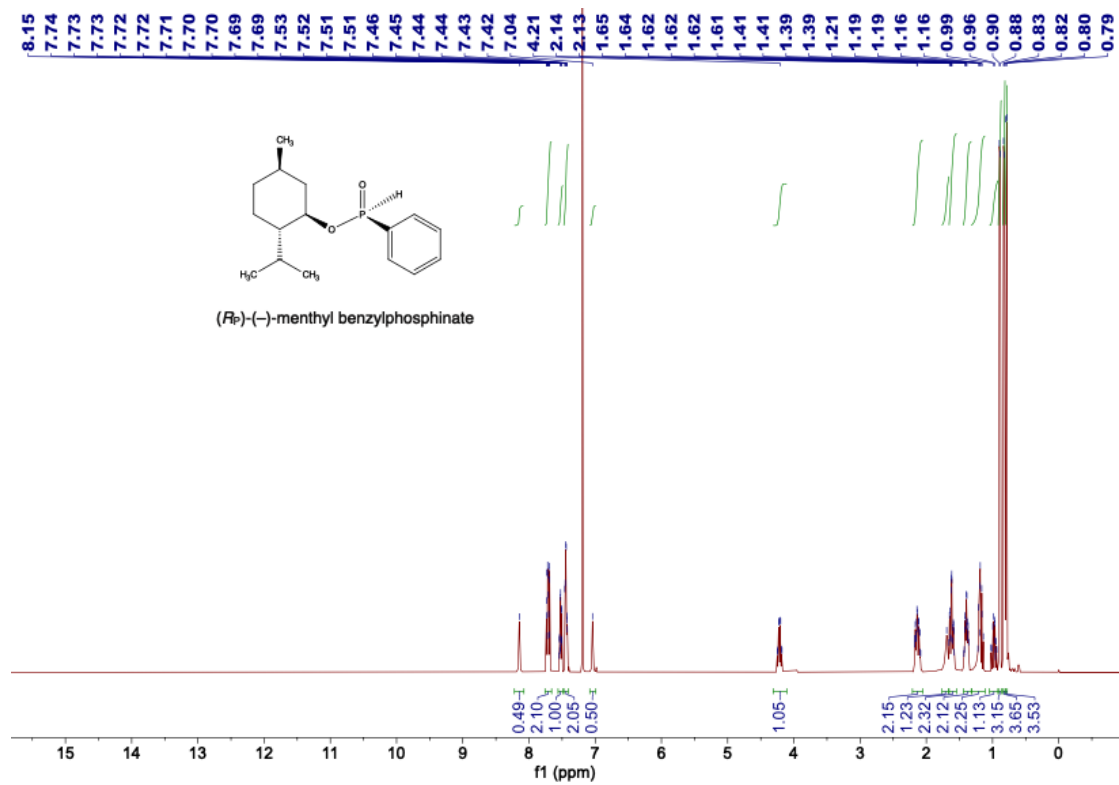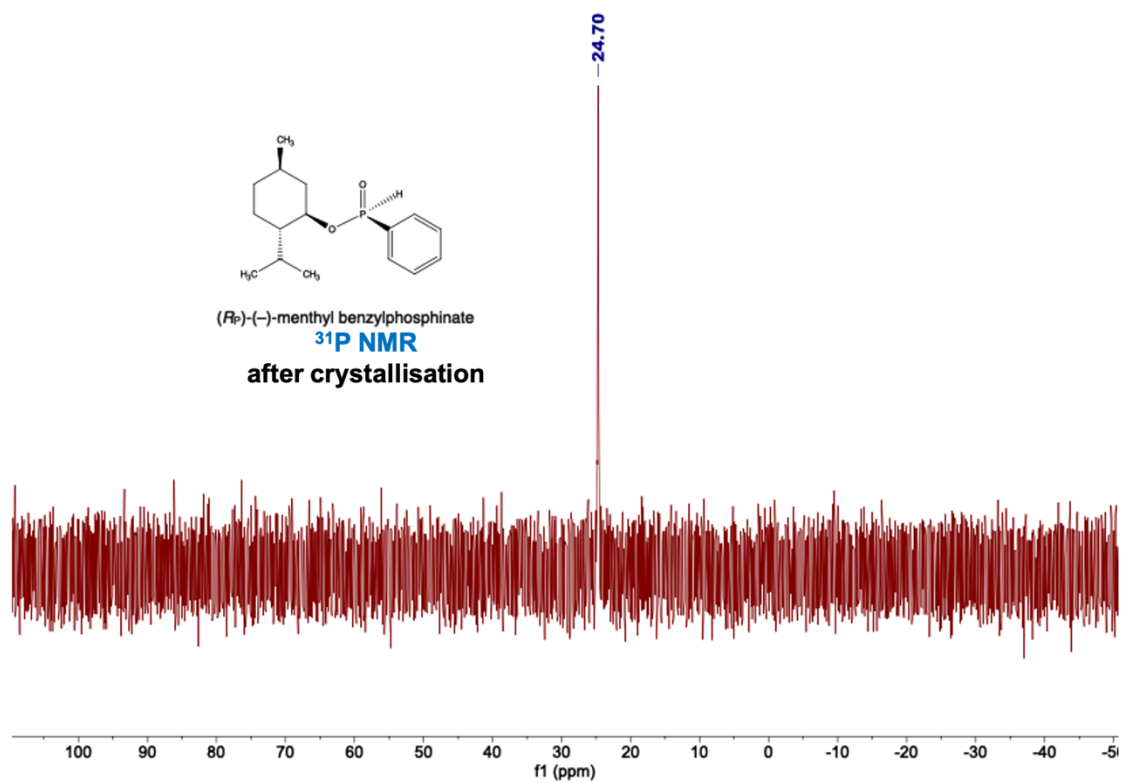

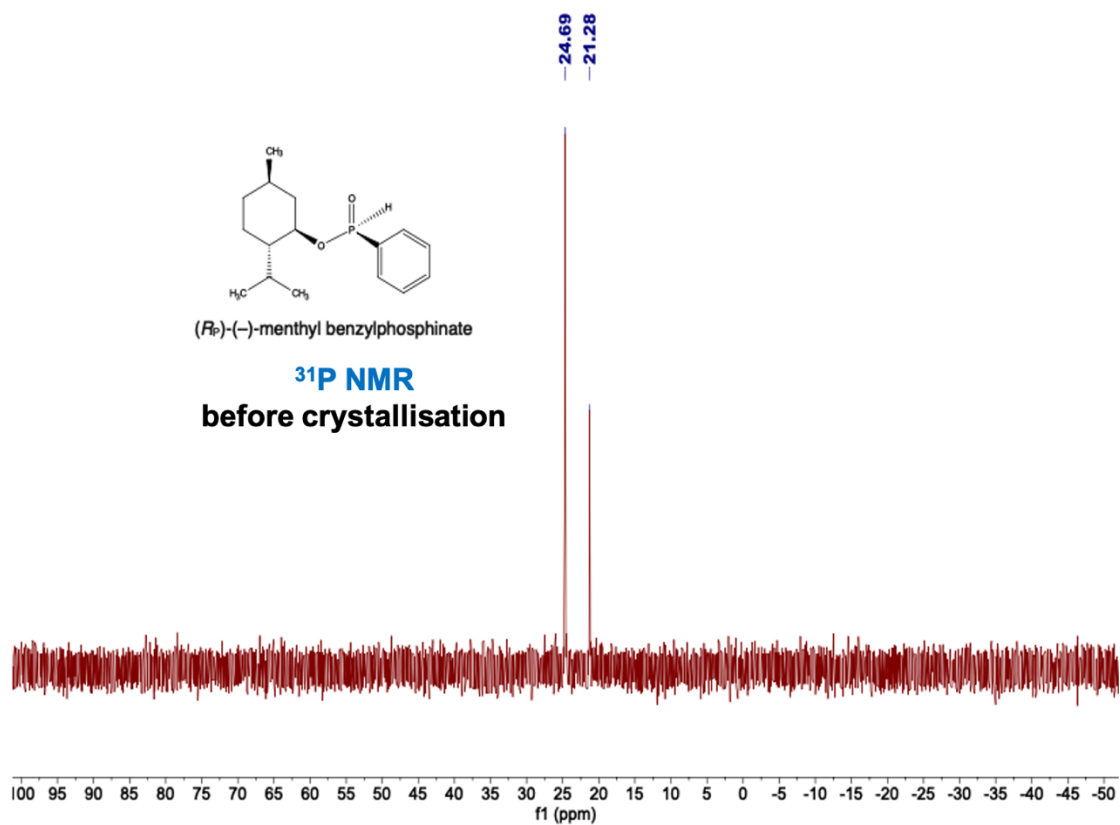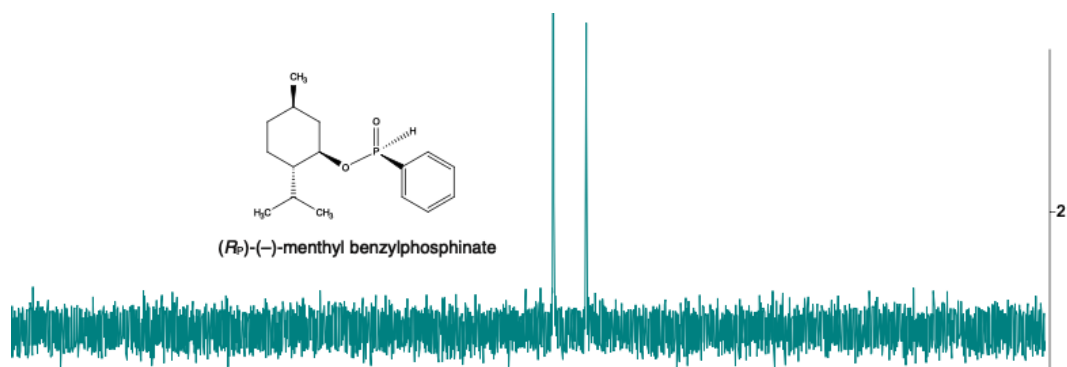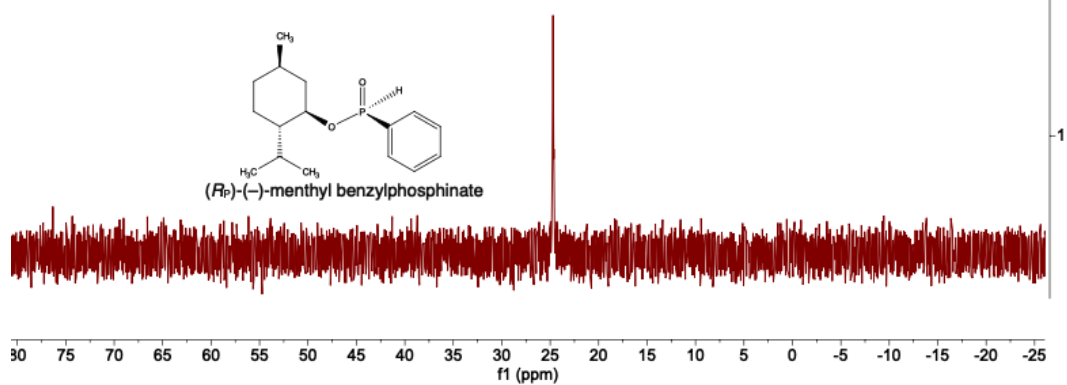

#### IV. Reference:

- (1) Zhang, S.; Xiong, H.; Lu, F.; Ma, F.; Gu, Y.; Ma, P.; Xu, H.; Yang, G. Synthesis of N -Acyl Sulfamates from Fluorosulfonates and Potassium Trimethylsilyloxy Imidates. *J. Org. Chem.* **2019**, *84* (23), 15380–15388. <https://doi.org/10.1021/acs.joc.9b02394>.
- (2) Zhao, Y. L.; Wu, G. J.; Han, F. S. Ni-Catalyzed Construction of C-P Bonds from Electron-Deficient Phenols via the in Situ Aryl C-O Activation by PyBroP. *Chem. Commun.* **2012**, *48* (47), 5868–5870. <https://doi.org/10.1039/c2cc31718d>.
- (3) Huang, C.; Tang, X.; Fu, H.; Jiang, Y.; Zhao, Y. Proline/Pipecolinic Acid-Promoted Copper-Catalyzed P -Arylation. *J. Org. Chem.* **2006**, *71* (13), 5020–5022. <https://doi.org/10.1021/jo060492j>.
- (4) Ackermann, L.; Born, R.; Spatz, J. H.; Meyer, D. Efficient Aryl-(Hetero)Aryl Coupling by Activation of C-Cl and C-F Bonds Using Nickel Complexes of Air-Stable Phosphine Oxides. *Angew. Chemie - Int. Ed.* **2005**, *44* (44), 7216–7219. <https://doi.org/10.1002/anie.200501860>.
- (5) Berrino, R.; Cacchi, S.; Fabrizi, G.; Goggiamani, A.; Stabile, P. Arenediazonium Tetrafluoroborates in Palladium-Catalyzed C-P Bond-Forming Reactions. Synthesis of Arylphosphonates, -Phosphine Oxides, and -Phosphines. *Org. Biomol. Chem.* **2010**, *8* (20), 4518–4520. <https://doi.org/10.1039/c0ob00243g>.
- (6) Edder, C.; Fréchet, J. M. J. Synthesis of Bridged Oligothiophenes: Toward a New Class of Thiophene-Based Electroactive Surfactants. *Org. Lett.* **2003**, *5* (11), 1879–1882. <https://doi.org/10.1021/ol034398q>.
- (7) Kabachnik, M. M.; Solntseva, M. D.; Izmer, V. V.; Novibora, Z. S.; Beletsbaya, I. P. Palladium-Catalyzed. Phase-Transfer Arylation of Dialkyl Phosphonates. *Russ. J. Org. Chem.* **1998**, *34*, 93–97.
- (8) Suto, Y.; Tsuji, R.; Kanai, M.; Shibasaki, M. Cu(I)-Catalyzed Direct Enantioselective Cross Aldol-Type Reaction of Acetonitrile. *Org. Lett.* **2005**, *7* (17), 3757–3760. <https://doi.org/10.1021/ol051423e>.
- (9) Andaloussi, M.; Lindh, J.; Sävmärker, J.; Sjöberg, P. J. R.; Larhed, M. Microwave-Promoted Palladium(II)-Catalyzed C-P Bond Formation by Using Arylboronic Acids or Aryltrifluoroborates. *Chem. - A Eur. J.* **2009**, *15* (47), 13069–13074. <https://doi.org/10.1002/chem.200901473>.
- (10) Liu, C.; Ji, C. L.; Zhou, T.; Hong, X.; Szostak, M. Decarbonylative Phosphorylation of Carboxylic Acids via Redox-Neutral Palladium Catalysis. *Org. Lett.* **2019**, *21* (22), 9256–9261. <https://doi.org/10.1021/acs.orglett.9b03678>.
- (11) Bonnaventure, I.; Charette, A. B. Probing the Importance of the Hemilabile Site of Bis(Phosphine) Monoxide Ligands in the Copper-Catalyzed Addition of Diethylzinc to N-Phosphinoylimines: Discovery of New Effective Chiral Ligands. *J. Org. Chem.* **2008**, *73* (16), 6330–6340.

- <https://doi.org/10.1021/jo800969x>.
- (12) Ghosh, I.; Shaikh, R. S.; König, B. Sensitization-Initiated Electron Transfer for Photoredox Catalysis. *Angew. Chemie - Int. Ed.* **2017**, *56* (29), 8544–8549. <https://doi.org/10.1002/anie.201703004>.
- (13) van der Knaap, T. A.; Klebach, T. C.; Lourens, R.; Vos, M.; Bickelhaupt, F. Oxidation Reactions of Phosphaalkenes. *J. Am. Chem. Soc.* **1983**, *105* (12), 4026–4032. <https://doi.org/10.1021/ja00350a047>.
- (14) Fu, W. C.; So, C. M.; Kwong, F. Y. Palladium-Catalyzed Phosphorylation of Aryl Mesylates and Tosylates. *Org. Lett.* **2015**, *17* (23), 5906–5909. <https://doi.org/10.1021/acs.orglett.5b03104>.
- (15) Xiang, C. B.; Bian, Y. J.; Mao, X. R.; Huang, Z. Z. Coupling Reactions of Heteroarenes with Phosphites under Silver Catalysis. *J. Org. Chem.* **2012**, *77* (17), 7706–7710. <https://doi.org/10.1021/jo301108g>.
- (16) Yang, J.; Xiao, J.; Chen, T.; Han, L. B. Nickel-Catalyzed Phosphorylation of Phenol Derivatives via C-O/P-H Cross-Coupling. *J. Org. Chem.* **2016**, *81* (9), 3911–3916. <https://doi.org/10.1021/acs.joc.6b00289>.
- (17) Yang, J.; Xiao, J.; Chen, T.; Han, L. B. Nickel-Catalyzed Phosphorylation of Aryl Triflates with P([Formula Presented]) Compounds. *J. Organomet. Chem.* **2016**, *820*, 120–124. <https://doi.org/10.1016/j.jorganchem.2016.07.026>.
- (18) Onouchi, H.; Maeda, K.; Yashima, E. A Helical Polyelectrolyte Induced by Specific Interactions with Biomolecules in Water [10]. *J. Am. Chem. Soc.* **2001**, *123* (30), 7441–7442. <https://doi.org/10.1021/ja0160647>.
- (19) W.B. Farnham, R.K. Murray, K. Mislow, Stereospecific alkylation of menthyl phenylphosphinate, *J. Am. Chem. Soc.* **92** (1970) 5809–5810. doi:10.1021/ja00722a083.
- (20) D. Moraleda, D. Gatineau, D. Martin, L. Giordano, G. Buono, A simple route to chiral phosphinous acid-boranes, *Chem. Commun.* (2008) 3031–3033. doi:10.1039/b802817f.
- (21) W.M. Wang, L.J. Liu, C.Q. Zhao, L.B. Han, Diastereoselective hydrolysis of asymmetric P-Cl species and synthesis of optically pure (RP)-(-)-menthyl H-phenylphosphinate, *European J. Org. Chem.* **2015** (2015) 2342–2345. doi:10.1002/ejoc.201500126.
- (22) X. Zhang, H. Liu, X. Hu, G. Tang, J. Zhu, Y. Zhao, Ni(II)/Zn Catalyzed Reductive Coupling of Aryl Halides with Diphenylphosphine Oxide in Water, *Org. Lett.* **13** (2011) 3478–3481. doi:10.1021/ol201141m.
